# Supplementary material for: Symptoms of post-traumatic stress disorder and depression among Eritrean refugees in Ethiopia: identifying direct, meditating and moderating predictors from path analysis
Source: PubMed Central journal article supplement — BMJ Open. 2019 Jan 17;9(1):e021142. doi: 10.1136/bmjopen-2017-021142 (PMC6340455; doi:10.1136/bmjopen-2017-021142), 2019-01-17
Supplement: bmjopen-2017-021142.draft_revisions.pdf [file bmjopen-2017-021142.draft_revisions.pdf]

# BMJ Open

BMJ Open is committed to open peer review. As part of this commitment we make the peer review history of every article we publish publicly available.

When an article is published we post the peer reviewers' comments and the authors' responses online. We also post the versions of the paper that were used during peer review. These are the versions that the peer review comments apply to.

The versions of the paper that follow are the versions that were submitted during the peer review process. They are not the versions of record or the final published versions. They should not be cited or distributed as the published version of this manuscript.

BMJ Open is an open access journal and the full, final, typeset and author-corrected version of record of the manuscript is available on our site with no access controls, subscription charges or pay-per-view fees (<http://bmjopen.bmj.com>).

If you have any questions on BMJ Open's open peer review process please email [editorial.bmjopen@bmj.com](mailto:editorial.bmjopen@bmj.com)

# BMJ Open

## Symptoms of Post Traumatic Stress Disorder and Depression among Eritrean refugees in Ethiopia: Identifying Direct, Mediating and Moderating Predictors from Path Analysis

|                               |                                                                                                                                                                                                                                  |
|-------------------------------|----------------------------------------------------------------------------------------------------------------------------------------------------------------------------------------------------------------------------------|
| Journal:                      | <i>BMJ Open</i>                                                                                                                                                                                                                  |
| Manuscript ID                 | bmjopen-2017-021142                                                                                                                                                                                                              |
| Article Type:                 | Research                                                                                                                                                                                                                         |
| Date Submitted by the Author: | 25-Dec-2017                                                                                                                                                                                                                      |
| Complete List of Authors:     | Getnet, Berhanie; Addis Ababa University School of Medicine, Psychiatry<br>Medhin, Girmay; Addis Ababa University, Aklilu Lemma Institute of Pathobiology<br>Alem, Atalay; Addis Ababa University School of Medicine, Psychiatry |
| Keywords:                     | Mediation, Moderation, Post Traumatic Stress Disorder, Depression, Eritrean refugees                                                                                                                                             |
|                               |                                                                                                                                                                                                                                  |

SCHOLARONE™  
Manuscripts

1  
2  
3 **Symptoms of Post Traumatic Stress Disorder and Depression among Eritrean refugees in**  
4 **Ethiopia: Identifying Direct, Meditating and Moderating Predictors from Path Analysis**  
5

6 Berhanie Getnet,<sup>1\*</sup> M.A., Girmay Medhin,<sup>2</sup> M.Sc., Ph.D., Atalay Alem,<sup>1</sup> M.D., Ph.D  
7

8 **Corresponding Author:** Berhanie Getnet,; College of Health Sciences, Department of Psychiatry, Addis Ababa University;  
9 Addis Ababa, Ethiopia; email address: [berhanie.getnet.bg@gmail.com](mailto:berhanie.getnet.bg@gmail.com) ; Cell phone: +251911336295  
10

11 <sup>1</sup>College of Health Sciences Department of Psychiatry, Addis Ababa University; Addis Ababa, Ethiopia

12 <sup>2</sup>Aklilu Lemma Institute of Pathobiology, Addis Ababa University, Addis Ababa, Ethiopia  
13

14 Text word count (excluding figures, tables, references, abstract) 3933  
15  
16  
17  
18  
19  
20  
21  
22  
23  
24  
25  
26  
27  
28  
29  
30  
31  
32  
33  
34  
35  
36  
37  
38  
39  
40  
41  
42  
43  
44  
45  
46  
47  
48  
49  
50  
51  
52  
53  
54  
55  
56  
57  
58  
59  
60

For peer review only

## Abstract

**Objectives:** This study aimed at testing the significance of mediating and moderating roles of sense of coherence, adaptive coping styles and social support in the relationship between exposure to trauma and psychological symptoms.

**Design:** Cross-sectional survey design was employed.

**Setting:** This study was carried out in Tigray region, Mai Aini refugee camp, 1116 Km. North of Addis Ababa, the capital of Ethiopia.

**Participants:** 562 adult refugees aged 18-74 were randomly selected from eligible Eritrean refugee community living in the camp to screen for depression and PTSD and to look for associated factors.

**Results:** Pre-migration living difficulties were directly associated with symptoms of PTSD ( $\beta=0.09$ ,  $p < 0.05$ ), and indirectly associated with PTSD through paths of duration of stay in camp, sense of coherence, post-migration living difficulties, task-oriented coping style and depression (standardized indirect coefficient = 0.26,  $p < 0.01$ ). Pre-migration living difficulties were directly associated with depression ( $\beta=0.35$ ,  $p < 0.001$ ). Post-migration living difficulties were directly associated with depression ( $\beta=0.23$ ,  $p < 0.05$ ), and indirectly associated with PTSD through paths of sense of coherence, task-oriented coping and depression (standardized indirect coefficient = 0.13,  $p < 0.01$ ). Sense of coherence and task-oriented coping didn't moderate the effect of pre and post-migration living difficulties on neither PTSD nor depression. Social support moderated the effect of post-migration living difficulties on depression ( $P < 0.05$ ). Emotion-oriented coping moderated the effect of pre-migration threat for abuse on PTSD ( $\beta = -0.18$ ,  $p < 0.001$ ) and depression ( $\beta = -0.12$ ,  $p < 0.01$ ), while it moderated threat for life on PTSD ( $\beta = -0.13$ ,  $p < 0.001$ ).

**Conclusions:** Sense of coherence and task-oriented coping style partially mediated the association between exposure to trauma and psychological symptoms. Emotion-oriented coping style and social support moderated the effect of pre and post-migration living difficulties, respectively. Fostering social support, task-oriented and emotion-oriented coping styles seem to be beneficial for these refugees.

**Key words:** Mediation, moderation, PTSD, depression, Eritrean refugees, Ethiopia

## Strength and limitations of the Study

- Participants were randomly drawn from refugee community coming from diversified socio-economic background and occupational profile from many places of Eritrea gives advantage to generalize findings to Eritrean refugee population in Ethiopia.
- In calculating indirect (mediated) effect, the mediating roles of multiple factors were taken into account instead of single mediating factor, and this is strength of this study.
- However, the inherent nature of cross-sectional design may make it difficult to draw cause-effect relationship between variables of research interest.
- Outcome measures used in this study were tested only using 50 respondents.

## Background

In contemporary mental health research in humanitarian settings, to look into the effect of traumatic events on the mental wellbeing of survivors is becoming a common phenomenon. There is also increasing interest to investigate mediators which can be either precipitating risk factors like exposure to post migration trauma,<sup>1</sup> maladaptive coping method,<sup>2</sup> as well as protective factors such as adaptive coping strategy, sense of coherence and social support. These are among vital factors tested for mediating and moderating mental health problems in humanitarian settings principally because identification of these variables yields vital information for planning intervention. In this regard, there is evidence regarding the mediating roles of sense of coherence,<sup>3-4</sup> use of coping methods,<sup>5</sup> and social support<sup>6</sup> between adverse life events and mental health outcome such as: post-traumatic stress disorder (PTSD), depression

1  
2  
3 and anxiety in emergency settings. The moderating roles of sense of coherence,<sup>7-9</sup> emotion-  
4 oriented coping method,<sup>10</sup> and social support<sup>11-12</sup> were also reported.

5 A study from Tibetan refugees in India indicated that exposure to trauma is positively and  
6 significantly associated with coping style and coping style mediated the association between  
7 exposure to trauma and symptoms (i.e., depression and PTSD).<sup>5</sup> In another study which  
8 compared the use of different coping strategies among victims of PTSD and controls, it was  
9 found that those with PTSD were more likely to use emotion-oriented coping style in dealing  
10 with stressful events compared to those without PTSD.<sup>13</sup> The kind of Coping style would  
11 moderate (strengthen or weaken) the association between the other resilience variables and  
12 PTSD symptoms.<sup>14</sup> In the same study, engagement coping style was hypothesized to strengthen  
13 the above associations, while disengagement coping style would weaken them.<sup>14</sup> In addition, the  
14 finding in the Democratic Republic of Congo indicated that the interaction between emotion-  
15 oriented coping strategy and problem-oriented coping strategy (coping flexibility) were  
16 associated with lower psychological distress.<sup>10</sup>

17  
18  
19  
20 Population-based studies in Eritrea and Iraq showed that sense of coherence was found to be  
21 negatively associated with PTSD symptoms.<sup>8-9</sup> Cross-cultural studies aimed at determining the  
22 relationship between sense of coherence and coping strategies in Chinese and US participants  
23 showed that sense of coherence was predictor of problem solving and avoidance coping  
24 strategies.<sup>15</sup> In addition, a study from samples of Pakistan and German indicated the mediation  
25 role of sense of coherence between social support and stress.<sup>3</sup>

26  
27  
28  
29 Structural Equation Modeling (SEM) analysis from among Zimbabwean refugees in South  
30 Africa showed that post-migration living difficulties mediated the association between pre-  
31 migration living difficulties and PTSD.<sup>1</sup> In the same study, mental distress (where depression is  
32 one of indicator variables) significantly and positively predicted PTSD.<sup>1</sup> A study in Ethiopia  
33 among internally displaced persons indicated that some sub-scales of coping interact with  
34 displacement related traumatic events leading to have significant association with mental  
35 distress.<sup>16</sup>

36  
37 Although there are reports on mediating and moderating roles of sense of coherence, copying  
38 styles, and social support in the association between exposure to trauma and psychological  
39 symptoms in humanitarian settings, to our knowledge there are no such studies in Eritrean  
40 refugees living in Ethiopia. Therefore, the present study aimed at addressing this research gap.

## 41 **Materials and Methods**

42 **Study setting:** This study was conducted at Mai-Aini refugee camp which is one of the largest  
43 refugee camps in Tigray Region, 1116 km North of Addis Ababa, the capital city of Ethiopia.  
44 Mai-Ani is one of the refugee camps used by Eritreans which was established in 2008 through  
45 support given by the United Nations Higher Commissioner for Refugees (UNHCR) to the  
46 Ethiopian Government.<sup>42</sup> As of 2013, this camp alone hosts about 17,825 Eritrean refugees.<sup>43</sup>  
47 The camp has self contained structure with provision of employment opportunities; health and  
48 education support to the local Ethiopians as well as the Eritreans, but it does not provide a long  
49 stay environment for the new arrivals.<sup>42</sup>

## 50 **Study design**

51 Data for this particular report were collected using a cross-sectional study design.  
52  
53  
54  
55  
56  
57

### Sample size estimation

Sample size determination was done taking into account the average PTSD prevalence of 30.73% among refugees in East African camps<sup>18-20</sup> with 4% precision and 95% confidence interval. Adding 10% for the likely non-response, the final calculated sample size using single population proportion formula<sup>17</sup> was 562 adults.

### Sampling

Households were taken as a sampling frame for the survey. According to population census document we were able to obtain from ARRA and UNCHR, there were a total of 10,006 registered refugees living in the camp in December 2015, of which 4,257 were females and 5,749 males. But, this document contained incomplete information about refugees' addresses, especially for the newly arrived. Thus, we conducted numbering and making census of households from December 2015 to January, 2016. A total of 2055 households were registered out of which 100 houses holds were filtered out because they were units for unaccompanied minors (children below the age of 18 living without their parents or guardians). Thus, the remaining 1955 units of households were taken as a sampling frame. Finally, 562 households were selected using simple random sampling method. One participant was selected from each household using a lottery method from among members of the household aged 18 and above. Twenty two of the selected households were replaced because household members were not found upon three visits by data collectors. The replacement was done from neighboring households (i.e. from those that preceded or followed the selected household numbers) Data collection took place from January to March, 2016.

### Variables

PTSD and depression were taken as the main outcome variables of the research interest. Pre and post-migration living difficulties were considered to be the exposure and main predictor variables. Sense of coherence, task-oriented coping, emotion-oriented, avoidance-oriented coping styles and social support were conceptualized as mediating as well as moderating variables and assumed to moderate the effect of exposure to traumatic events on psychological symptoms. Variables such as: gender, age, marital statuses, educational background, frequency of using religious coping method, and duration of stay in the refugee camp were regarded as potentially confounders.

### Instrument adaptation

All the instruments were adapted following adaptation procedures for instruments for trans-cultural study.<sup>34</sup> Except for Center for Epidemiologic Studies Depression (CES-D) Scale, all instruments described below were translated from the source language (English) into the target language (Tigrigna) by two bilingual experts, and then masked back translated into English by other two independent bilingual translators. The translations as well as the back translations were given to an expert panel whose mother tongue was Tigrigna, the language used for the study. Having the input from the feedbacks obtained from experts, consensus meetings were held to merge the two translated versions by the translators. The translations were then rated using a 4-point rating scale for their content relevance by seven experts to obtain content validity index.<sup>35-</sup>

<sup>36</sup> Besides, cognitive interviews were conducted with six refugees from the target community and hence minor revisions were made based on their feedbacks. All the instruments were pilot tested before they were employed to collect data for the main study.

### Measures

An exposure variable of interest, traumatic events, were measured using *Pre and Post Migration Living Difficulties Checklist*.<sup>1</sup> This tool was developed and used to measure traumatic events of

Zimbabwean refugees in South Africa in pre and post-migration periods. It has 14-item checklist with five point response format (i.e. strongly disagree score = 1; disagree = 2; neutral = 3; agree = 4, and strongly agree = 5). In order to differentiate those who had encountered trauma from those who hadn't, the authors re-coded responses 1 to 3 to 0 and 4 & 5 to 1.<sup>21</sup> In the pilot study (n=50), internal consistency alpha values of 0.86 and 0.83 were obtained for pre-migration and post-migration living difficulties, respectively. Besides, the item level Content Validity Index (I-CVI) for the fourteen items in the present study ranged from 0.86 to 1.00. The scale level average content validity index (S-CVI/Ave) was found to be 0.98.

Depression was measured using *Center for Epidemiologic Studies Depression Scale (CES-D)*.<sup>22</sup> The English version of CES-D is a brief 20 item scale with four alternative response options, which ranges from 'None of the time' to be scored 0 to 'Most of the time' to be scored 3, and this instrument is designed to measure depressive symptomatology in the general population.<sup>22</sup> CES-D was translated and validated into Tigrigna for Tigrigna speaking Eritrean refugees in the United States, and the adaptation study found alpha value of 0.86 for internal consistency and 0.91 for test re-test reliability.<sup>23</sup> The internal consistency in the present study demonstrated 0.92 in pilot study (n=50). After allowing unique values to correlate, Confirmatory Factor Analysis (CFA) suggested that the present data best fits with two dimensions of negative affect and positive affect ( $\chi^2 = 271.65$ ;  $df = 144$ ;  $CFI = 0.975$ ;  $TLI = 0.967$ ;  $SRMR = 0.0378$ ;  $RMSEA = 0.04$ ) with sufficient loadings of all the 20 items to either of these two dimensions better than other computing factor structures of CES-D in the literature. Thus, composite reliability alpha of the two factors negative Affect (16 Items) has an Alpha value which is 0.93, whereas the positive Affect (4 items) has an alpha value of 0.70. Moreover, the I-CVI values for the 20 items ranged from 0.71 to 1.00 and S-CVI/Ave for the total scale was found to be 0.92.

PTSD was measured using *Primary Care PTSD Screener (PC-PTSD)*.<sup>24</sup> This is a four item brief screening instrument, having two response options, 'Yes' or 'No'.<sup>24</sup> Test re-test reliability was found to be 0.83.<sup>25</sup> Furthermore, the sensitivity and specificity of PC-PTSD is found to be 0.78 and 0.87, respectively.<sup>24</sup> The scale was extensively used to study PTSD among veterans in United States,<sup>24-25</sup> Afghanistan and Iraq,<sup>26</sup> its use for screening PTSD in refugees is also well documented.<sup>27-28</sup> In the present study, the internal consistency alpha value was found to be .68 in the pilot study (n=50). Item-total correlation for the four items ranged from 0.59 to 0.75 in the pilot study. For the four items, Item level Content Validity Index (I-CVI) is 1, which makes the overall Scale level Item Validity Index (S-IVI) to be 1. Moreover, Principal Component Analysis (PCA) shows that the four items loaded on a single factor (ranging from 0.582 to 0.818). Similarly, CFA analysis demonstrated that all the four items, each of which basically represent one factor structure of PTSD, loaded adequately onto a single dimension, ranging from 0.49 (numbing) to 0.73 (re-experiencing).

Coping strategies were measured using a *Coping Style Scale*,<sup>16</sup> which consists 10 items. The items require participants to respond as "this is not like me" or "this is like me".<sup>16</sup> This instrument was cross-culturally validated by Trans-cultural Psychosocial Organization (TPO), and later used to study displaced Ethiopians from Eritrea during secession of Eritrea from Ethiopia.<sup>16, 29</sup> This scale roughly captured three coping strategies, including: task-oriented, avoidance-oriented and emotion-oriented coping strategies.<sup>16</sup> In the present study, the internal consistency alpha value was found to be 0.61 in the pilot study (n=50).



1  
2  
3  
4 Resilience was measured using *Sense of Coherence Scale (SoC-13)*.<sup>30</sup> This is a 13-item semantic  
5 differential scale adapted for Eritrean culture in the form of a 5-point Likert scale from the  
6 original 7-point scale to reduce complexity<sup>8</sup>. Responses for the items 1, 2, 3, 7, and 10 were  
7 coded reversely.<sup>31</sup> The instrument was reported to have proved an adequate measure of resilience  
8 in Eritrean population.<sup>8</sup> Despite the conflicting findings regarding the dimensionality of SoC-  
9 13,<sup>32</sup> our data in the present study fits well into a single factor structure, except for item-2.  
10 Twelve items have demonstrated significant loadings onto a single factor ( $\chi^2=57.54$ ;  $df=34$ ;  
11 CMIN/ $df=1.69$ ; CFI= 0.98; RMSEA= 0.035), which gives a supporting evidence that it  
12 measures a uni-dimensional construct as proposed by the original scale developer.<sup>30</sup> From the  
13 pilot study ( $n=52$ ) Cronbach's alpha value for internal consistency was 0.67.  
14  
15

16  
17 Social support was measured using *Oslo Social Support Scale (OSS-3)*.<sup>12</sup> This is a scale  
18 consisting of three items in which sum scores range from 3-14.<sup>33</sup> In a validation study of OSS-3  
19 in Nigeria, Cronbach's alpha value for internal consistency was found to be 0.5.<sup>33</sup> In the present  
20 pilot study ( $N=52$ ), Cronbach's alpha value was 0.39. CFA showed that all the items  
21 significantly and adequately loaded onto a single factor ranging from 0.49 to 0.68. All the items  
22 received I-CVI of 1, which makes S-CVI to be 1 for the total scale.  
23

### 24 **Statistical analysis**

25 Associations and direction of associations tested in this study were hypothesized based on  
26 existing literature. Path analysis was performed to test the significance and direction of  
27 association as well as to identify direct and indirect effect of variables. IBM SPSS Amos,  
28 version, 21 was employed to carry out the path analysis. The effect of interaction among some  
29 coping sub-scales with sub-scales of pre and post migration living difficulties was calculated by  
30 multiplying the respective variables there by interaction terms were created. Then, the effect of  
31 each interaction term was tested for its significance of association with PTSD, depression or both  
32 using independent path analysis. Item-level Content Validity Index (I-CVI) values of 0.78 or  
33 higher are considered to be valid indices for content validity if the instrument is rated by 6 to 10  
34 experts.<sup>35</sup> In the present study the cut-off values for fit indices of accepted model include: values  
35 of chi-square to degree of freedom ( $\chi^2/df$ ) less than 3; greater than or equal to 0.95 for  
36 Comparative Fit Index (CFI); greater than or equal to 0.95 for Tucker Lewis Index (TLI);  
37 less than or equal to 0.06 to 0.08 for Root Mean Square Error of Approximation (RMSEA),  
38 less than or equal to 0.08 for Standardized Root Mean Square Residual (SRMR).<sup>44</sup>  
39  
40  
41

### 42 **Result**

#### 43 **Characteristics of participants**

44 Of the 652 participants (Table-1), 304(54.1%) were females. Age ranged from 18-74 (with mean  
45 age=29.63,  $SD=10.18$ ); the majority was literate; the average duration of stay in the refugee  
46 camp was 3.71 years. High proportion of participants belonged to the Tigrinya ethnic group  
47 (92%). Very few participants came from Saho, Bilen, Tigre and Jabelty ethnic groups of Eritrea  
48 constituting 8% altogether. Eighty five percent were followers of Coptic Orthodox Christianity.  
49 They had diverse profile of occupation before coming to Ethiopia, but students, x-soldiers and  
50 farmers constituted 71%.  
51  
52  
53  
54  
55  
56  
57  
58  
59  
60



Table-1: Socio-demographic characteristics of participant

| Characteristics            |                           | Number (%) |
|----------------------------|---------------------------|------------|
| Sex                        | Male                      | 258(45.9)  |
|                            | Female                    | 304(54.1)  |
| Age                        | Mean(SD)                  | 29.6(10.2) |
|                            | 18-24                     | 205 (36.5) |
|                            | 25-34                     | 219(39.0)  |
|                            | 35-44                     | 89(15.8)   |
|                            | 45-54                     | 29(5.2)    |
|                            | 55-64                     | 15(2.5)    |
| Educational Background     | 65-75                     | 5 (0.9)    |
|                            | Non-literate              | 67(11.9)   |
|                            | Elementary school         | 232(41.3)  |
|                            | Secondary school          | 238(42.3)  |
| Marital status             | College graduate or above | 25(4.5)    |
|                            | Single                    | 189(33.6)  |
|                            | Married                   | 327(58.2)  |
|                            | Divorced                  | 29(5.2)    |
| Religion                   | Widowed                   | 17(3.0)    |
|                            | Orthodox                  | 477(84.9)  |
|                            | Protestant                | 17(3.0)    |
|                            | Catholic                  | 23(4.1)    |
|                            | Muslim                    | 44(7.8)    |
| Past occupation in Eritrea | Jehovah witness           | 1(0.2)     |
|                            | Student                   | 201 (35.7) |
|                            | Military                  | 111 (19.8) |
|                            | Farmer                    | 89 (15.8)  |
|                            | Home maid                 | 66 (11.75) |
|                            | Educator                  | 23 (4.1)   |
|                            | Daily laborers            | 15 (2.7)   |
| Others                     | 57(13.1)                  |            |

### Direct and mediating predictors of PTSD and depression

The path model presented in figure-1 fits to the data well ( $\chi^2=39.97$ ;  $df = 24$ ;  $\chi^2/df = 1.67$ ; CFI=0.985; TLI= 0.972; SRMR=0.05; RMSEA=0.034 (90% CI=0.013, 0.053);  $p=0.022$ ). In examining the paths in detail, both pre-migration ( $\beta=-0.19$ ,  $p<0.001$ ) and post-migration ( $\beta = -0.15$ ,  $p<0.001$ ) trauma are significantly associated with sense of coherence. Sense of coherence in turn is significantly and negatively associated with symptoms of PTSD ( $\beta = -0.16$ ,  $p<0.001$ ) and depression ( $\beta= -0.40$ ,  $p<0.001$ ) (Table-2). Pre-migration living difficulties were directly associated with symptoms of PTSD ( $\beta=0.09$ ,  $p <0.05$ ) and with depression ( $\beta= 0.35$ ,  $p < 0.001$ ). It was also indirectly associated with depression via sense of coherence and post-migration living difficulties. Post-migration living difficulties were directly associated with depression ( $\beta= 0.23$ ,  $p<0.001$ ) and indirectly associated with PTSD via sense of coherence, symptoms of depression, and task-oriented coping style.

Table 2: Path coefficients between predictors and endogenous variables in the path model

| Predictors                  | Endogenous variables      | Unstandardized Estimate(95%,CI) | Standard Error | Standardized Path Coefficient | p-values |
|-----------------------------|---------------------------|---------------------------------|----------------|-------------------------------|----------|
| Pre-migration difficulties  | Post-migration            | 0.21 (0.17, 0.25)               | 0.021          | 0.39                          | p<0.001  |
| Post-migration difficulties | Sense of coherence        | -0.21 (-0.32, -0.10)            | 0.056          | -0.15                         | p<0.001  |
| Pre-migration difficulties  | Sense of coherence        | -0.14 (-0.20, -0.08)            | 0.031          | -0.19                         | p<0.001  |
| Social support              | Sense of coherence        | 1.28 (1.01, 1.55)               | 0.139          | 0.35                          | p<0.001  |
| Sense of coherence          | Depression                | -0.59 (-0.68, -0.50)            | 0.046          | -0.40                         | p<0.001  |
| Pre-migration difficulties  | Depression                | 0.38 (0.31, 0.45)               | 0.034          | 0.35                          | p<0.001  |
| Post-migration difficulties | Depression                | 0.46 (0.34, 0.58)               | 0.062          | 0.23                          | p<0.001  |
| Pre-migration difficulties  | Duration of stay          | 0.02 (0.00, 0.04)               | 0.011          | 0.09                          | p<0.05   |
| Social support              | Depression                | -0.78 (-1.05, -0.51)            | 0.162          | -0.14                         | p<0.001  |
| Post-migration difficulties | Task-oriented coping      | 0.03 (0.01, 0.05)               | 0.008          | 0.16                          | p<0.001  |
| Social support              | Task-oriented coping      | 0.13 (0.09, 0.17)               | 0.022          | 0.22                          | p<0.001  |
| Duration of stay            | PTSD                      | 0.07 (0.04, 0.10)               | 0.017          | 0.14                          | p<0.001  |
| Sense of coherence          | Avoidance-oriented coping | -0.01(-0.02, -0.002)            | 0.004          | -0.14                         | p<0.001  |
| Sense of coherence          | PTSD                      | -0.03 (-0.04, -0.02)            | 0.007          | -0.16                         | p<0.001  |
| Pre-migration difficulties  | PTSD                      | 0.01 (0.00, 0.02)               | 0.005          | 0.09                          | p<0.05   |
| Depression                  | PTSD                      | 0.04 (0.03, 0.05)               | 0.006          | 0.38                          | p<0.05   |
| Task-oriented coping        | PTSD                      | -0.07(-0.14, -0.004)            | 0.038          | -0.07                         | p<0.05   |
| Pre-migration difficulties  | Emotion-oriented coping   | 0.01 (0.004, 0.02)              | 0.003          | 0.09                          | p<0.001  |
| Sense of coherence          | Emotion-oriented coping   | -0.01(-0.02, -0.002)            | 0.004          | -0.14                         | p<0.01   |

Duration of stay in the refugee camp, sense of coherence, post-migration living difficulties, task-oriented coping style and depression together seem to mediate the association between pre-migration living difficulties and PTSD symptoms (standardized indirect coefficient = 0.26,  $p < 0.01$ ). Similarly, task-oriented coping style, sense of coherence and depression combined mediate the association between post-migration living difficulties and PTSD symptoms (standardized indirect coefficient = 0.13,  $p < 0.01$ ) (Table 3).

Table 3: Mediation analysis between exposure to trauma during pre and post- migration period and symptoms (PTSD and depression)

| Hypothesized relationship                       | Standardized Direct Effect | Standardized Indirect Effect | Result             |
|-------------------------------------------------|----------------------------|------------------------------|--------------------|
| Pre-migration living difficulties → PTSD        | 0.09*                      | 0.26 <sup>‡</sup>            | Partially mediated |
| Post-migration living difficulties → PTSD       | -0.05(n.s)                 | 0.13 <sup>‡</sup>            | Partially mediated |
| Pre-migration living difficulties → Depression  | 0.35 <sup>¥</sup>          | 0.19 <sup>‡</sup>            | Partially mediated |
| Post-migration living difficulties → Depression | 0.23 <sup>¥</sup>          | -0.06 <sup>‡</sup>           | Partially mediated |

\*  $p < 0.05$ ; <sup>‡</sup>  $p < 0.01$ ; <sup>¥</sup>  $p < 0.001$ ; n.s = not significant

Pre-migration and post migration living difficulties were not significantly associated with social support. Hence, social support is not a mediator for the association between exposure to trauma and symptoms in this path model (see figure-1).

[Figure-1: Path model depicting direct and indirect \(mediated\) association between exposure to trauma and mental health outcomes.](#)

The association between pre-migration living difficulties and depression is strengthened by exposure to post- migration living difficulties ( $\beta = 0.23$ ,  $p < 0.001$ ). Pre-migration living difficulties are significantly and positively associated with emotion-oriented coping style ( $\beta = 0.09$ ,  $p < 0.05$ ) as well as post-migration living difficulties ( $\beta = 0.39$ ,  $p < 0.001$ ). On the other hand, post-migration living difficulties are positively associated with task-oriented coping style ( $\beta = 0.16$ ,  $p < 0.001$ ). Depression partially mediated and strengthened the association between post-migration trauma and symptoms of PTSD ( $\beta = 0.38$ ,  $p < 0.001$ ).

### Moderators

Test for moderation (interaction effect) (Table-4) illustrates that sense of coherence and task-oriented coping style do not seem to moderate the effect of pre- migration living difficulties as well as post-migration living difficulties on neither PTSD nor depression ( $p > 0.05$ ). However, the interaction between social support and post-migration living difficulties is inversely associated with depression ( $p < 0.05$ ), and hence social support seems to moderate the effect of post-migration living difficulties on depression.

Table 4: Moderation analysis for sense of coherence, task-oriented coping style and social support

| Model | Main and interaction predictors                           | Standardized path coefficient to PTSD (n=562) | Standardized path coefficient to depression(n=562) |
|-------|-----------------------------------------------------------|-----------------------------------------------|----------------------------------------------------|
| 1     | Pre-migration living difficulties                         | 0.248 <sup>¥</sup>                            | 0.440 <sup>¥</sup>                                 |
|       | pre-migration living difficulties x Sense of coherence    | 0.057                                         | 0.022                                              |
|       | Sense of coherence                                        | -0.372 <sup>¥</sup>                           | -0.513 <sup>¥</sup>                                |
| 2     | Post-migration living difficulties                        | 0.103 <sup>£</sup>                            | 0.371 <sup>¥</sup>                                 |
|       | Post-migration living difficulties x Sense of coherence   | -0.036                                        | 0.053                                              |
|       | Sense of coherence                                        | -0.407 <sup>¥</sup>                           | -0.536 <sup>¥</sup>                                |
| 3     | Pre-migration living difficulties                         | 0.353 <sup>¥</sup>                            | 0.547 <sup>¥</sup>                                 |
|       | pre-migration living difficulties x Task-oriented coping  | 0.027                                         | -0.004                                             |
|       | Task-oriented coping                                      | -0.092 <sup>*</sup>                           | -0.012                                             |
| 4     | Post-migration living difficulties                        | 0.221 <sup>¥</sup>                            | 0.466 <sup>¥</sup>                                 |
|       | Post-migration living difficulties x task-oriented coping | -0.019                                        | -0.061                                             |
|       | Task-oriented coping                                      | -0.076                                        | 0.000                                              |
| 5     | Pre-migration living difficulties                         | 0.327 <sup>¥</sup>                            | 0.536 <sup>¥</sup>                                 |
|       | pre-migration living difficulties x social support        | 0.037                                         | -0.006                                             |
|       | social support                                            | -0.249 <sup>¥</sup>                           | -0.295 <sup>¥</sup>                                |
| 6     | Post-migration living difficulties                        | 0.193 <sup>¥</sup>                            | 0.445 <sup>¥</sup>                                 |
|       | Post-migration living difficulties x social support       | -0.029                                        | -0.106 <sup>*</sup>                                |
|       | Social support                                            | -0.253 <sup>¥</sup>                           | -0.259 <sup>¥</sup>                                |

<sup>¥</sup>  $p < 0.001$ , <sup>£</sup>  $p < 0.01$ , <sup>\*</sup>  $p < 0.05$

Emotion-oriented coping style seems to have a moderating effect upon PTSD when interacting with threat for life sub-scale of pre-migration for both females ( $\beta = -0.120$ ,  $p < 0.05$ ) (n=304) and

males ( $\beta = -0.114$ ,  $p < 0.05$ ) ( $n = 258$ ) (Table-5). Similarly, it is associated with reduced symptoms of PTSD and depression when interacting with threat for abuse sub-scale of pre-migration living difficulties. More specifically, the interaction between emotion-oriented coping styles with threat for abuse sub-scale of pre-migration trauma is negatively and significantly associated both with PTSD and depression (model-6). Sub-group analysis by gender (Table-5: models 7-12) demonstrated that exposure to post-migration trauma is associated with symptoms of PTSD only in females ( $p < 0.001$ ).

Table-5: The significance of path coefficients regarding main effect and interaction effect of predictors on symptoms of PTSD and depression.

| Model | Main and interaction predictors                      | Standardized path coefficient to PTSD |                    |                     | Standardized path coefficient to Depression |                    |                     |
|-------|------------------------------------------------------|---------------------------------------|--------------------|---------------------|---------------------------------------------|--------------------|---------------------|
|       |                                                      | Total (n=562)                         | Female (n=304)     | Male (n=258)        | Total (n=562)                               | Female (n=304)     | Male (n=258)        |
| 1     | Threat for life (Pre-migration)                      | 0.362 <sup>‡</sup>                    | 0.052 <sup>‡</sup> | 0.421 <sup>‡</sup>  | 0.483 <sup>‡</sup>                          | 0.720 <sup>‡</sup> | 0.484 <sup>‡</sup>  |
|       | Threat for life(pre-m) x Task-oriented coping        | 0.035                                 | 0.085              | 0.026               | 0.026                                       | 0.206              | 0.057               |
|       | Task-oriented coping                                 | -0.089*                               | -0.055             | -0.094              | 0.009                                       | 0.768              | -0.044              |
| 2     | Threat for life (Pre-migration)                      | 0.362 <sup>‡</sup>                    | 0.317 <sup>‡</sup> | 0.428 <sup>‡</sup>  | 0.492 <sup>‡</sup>                          | 0.514 <sup>‡</sup> | 0.494 <sup>‡</sup>  |
|       | Threat for life(pre-m) x Avoidance-oriented coping   | -0.069                                | -0.048             | -0.059              | -0.046                                      | -0.021             | -0.030              |
|       | Avoidance-oriented coping                            | 0.021                                 | 0.081              | -0.038              | 0.028                                       | 0.115              | -0.044              |
| 3     | Threat for life (Pre-migration)                      | 0.362 <sup>‡</sup>                    | 0.319 <sup>‡</sup> | 0.422 <sup>‡</sup>  | 0.483 <sup>‡</sup>                          | 0.514 <sup>‡</sup> | 0.484 <sup>‡</sup>  |
|       | Threat for life(pre-m) x Emotion-oriented coping     | -0.127 <sup>£</sup>                   | -0.120*            | -0.114*             | -0.047                                      | -0.060             | -0.015              |
|       | Emotion-oriented coping                              | 0.001                                 | 0.006              | -0.020              | 0.053                                       | 0.067              | 0.021               |
| 4     | Threat for Abuse (Pre-migration)                     | 0.203 <sup>‡</sup>                    | 0.224 <sup>‡</sup> | 0.181 <sup>£</sup>  | 0.504 <sup>‡</sup>                          | 0.538 <sup>‡</sup> | 0.461 <sup>‡</sup>  |
|       | Threat for Abuse(pre-m) x Task-oriented coping       | 0.010                                 | 0.019              | -0.002              | -0.079*                                     | -0.098             | -0.060              |
|       | Task-oriented coping                                 | -0.066                                | -0.069             | -0.064              | -0.012                                      | 0.015              | -0.038              |
|       | Threat for Abuse (Pre-migration)                     | 0.195 <sup>‡</sup>                    | 0.206 <sup>‡</sup> | 0.180 <sup>£</sup>  | 0.490 <sup>‡</sup>                          | 0.530 <sup>‡</sup> | 0.450 <sup>‡</sup>  |
| 5     | Threat for Abuse(pre-m) x Avoidance-oriented coping  | -0.025                                | -0.006             | -0.024              | -0.005                                      | 0.030              | -0.017              |
|       | Avoidance-oriented coping                            | 0.034                                 | 0.077              | -0.002              | 0.030                                       | 0.089              | -0.014              |
|       | Threat for Abuse (Pre-migration)                     | 0.238 <sup>‡</sup>                    | 0.227 <sup>‡</sup> | 0.269 <sup>‡</sup>  | 0.517 <sup>‡</sup>                          | 0.543 <sup>‡</sup> | 0.495 <sup>‡</sup>  |
| 6     | Threat for Abuse(pre-m) x Emotion-oriented coping    | -0.180 <sup>‡</sup>                   | -0.133*            | -0.240 <sup>‡</sup> | -0.116 <sup>£</sup>                         | -0.093             | -0.154 <sup>£</sup> |
|       | Emotion-oriented coping                              | -0.009                                | 0.011              | -0.036              | 0.006                                       | 0.030              | -0.024              |
|       | Threat for life (Post-migration)                     | 0.190 <sup>‡</sup>                    | 0.293 <sup>‡</sup> | 0.078               | 0.449 <sup>£</sup>                          | 0.502 <sup>‡</sup> | 0.400 <sup>‡</sup>  |
| 7     | Threat for life(post-m) x Task-oriented coping       | -0.035                                | -0.009             | -0.034              | -0.070*                                     | -0.056             | -0.090              |
|       | Task-oriented coping                                 | -0.073                                | -0.072             | -0.069              | 0.002                                       | 0.063              | -0.061              |
|       | Threat for life (Post-migration)                     | 0.182 <sup>‡</sup>                    | 0.281 <sup>‡</sup> | 0.067               | 0.453 <sup>‡</sup>                          | 0.522 <sup>‡</sup> | 0.382 <sup>‡</sup>  |
| 8     | Threat for life(post-m) x Avoidance-oriented coping  | -0.019                                | -0.013             | -0.016              | 0.029                                       | 0.045              | 0.017               |
|       | Avoidance-oriented coping                            | 0.037                                 | 0.083              | -0.002              | 0.050                                       | 0.114*             | -0.007              |
| 9     | Threat for life (Post-migration)                     | 0.182 <sup>‡</sup>                    | 0.281 <sup>‡</sup> | 0.063               | 0.452 <sup>‡</sup>                          | 0.521 <sup>‡</sup> | 0.382 <sup>‡</sup>  |
|       | Threat for life(post-m) x Emotion-oriented coping    | .0004                                 | 0.034              | -0.040              | 0.008                                       | 0.000              | 0.012               |
|       | Emotion-oriented coping                              | 0.022                                 | 0.023              | 0.020               | 0.075 <sup>a</sup>                          | 0.061              | 0.088               |
|       | Threat for Abuse (Post-migration)                    | 0.206 <sup>‡</sup>                    | 0.281 <sup>‡</sup> | 0.106               | 0.328 <sup>‡</sup>                          | 0.380 <sup>‡</sup> | 0.280 <sup>‡</sup>  |
| 10    | Threat for Abuse(post-m) x Task-oriented coping      | 0.004                                 | 0.029              | -0.034              | -0.054                                      | -0.107*            | -0.002              |
|       | Task-oriented coping                                 | -0.061                                | -0.072             | -0.061              | 0.038                                       | 0.078              | -0.006              |
|       | Threat for Abuse (Post-migration)                    | 0.199 <sup>‡</sup>                    | 0.276 <sup>‡</sup> | 0.093               | 0.329 <sup>‡</sup>                          | 0.387 <sup>‡</sup> | 0.273 <sup>‡</sup>  |
| 11    | Threat for Abuse(post-m) x Avoidance-oriented coping | 0.024                                 | 0.025              | 0.049               | 0.033                                       | 0.040              | 0.023               |
|       | Avoidance-oriented coping                            | 0.052                                 | 0.097              | 0.013               | 0.069                                       | 0.126*             | 0.014               |
| 12    | Threat for Abuse (Post-migration)                    | 0.201 <sup>‡</sup>                    | 0.272 <sup>‡</sup> | 0.111               | 0.331 <sup>‡</sup>                          | 0.384 <sup>‡</sup> | 0.278 <sup>‡</sup>  |
|       | Threat for Abuse(post-m) x Emotion-oriented coping   | -0.005                                | -0.018             | 0.003               | -0.033                                      | -0.014             | -0.052              |
|       | Emotion-oriented coping                              | 0.040                                 | 0.050              | 0.027               | 0.109*                                      | 0.111*             | 0.106*              |
| 13    | Task oriented coping                                 | -0.049                                | -0.025             | -0.072              | 0.038                                       | 0.114*             | -0.039              |
|       | Task-oriented coping x Emotion-oriented coping       | -0.025                                | 0.014              | -0.067              | -0.125 <sup>£</sup>                         | -0.115*            | -0.148*             |
|       | Emotion-oriented coping                              | 0.033                                 | 0.043              | 0.035               | 0.098*                                      | 0.077              | 0.125*              |

<sup>‡</sup>  $p < 0.001$ , <sup>£</sup>  $p < 0.01$ , \*  $p < 0.05$

Task-oriented coping style was independently and negatively associated with PTSD (Table 5: model 1), while emotion-oriented coping style showed positive association with depression (Table 5: models 9, 12 and 13) independently. Thus, emotion-oriented coping style seems to be a risk factor when tested for its independent prediction. On the contrary, the interaction between

1  
2  
3 emotion-oriented and task-oriented coping styles was negatively and significantly associated  
4 with depression for females ( $\beta = -0.12$ ,  $p < 0.05$ ) and males ( $B = -0.15$ ,  $p < 0.05$ ). Thus, emotion-  
5 oriented coping has dual role in that it became a protective factor when interacting with other  
6 variables (Table 5: Model- 3, 6 & 13), but a risk factor when tested for independent prediction.  
7 Avoidance-oriented coping style was a risk factor for females when tested as independent  
8 predictor (Table 5: models 8 and 11).  
9

## 10 11 **Discussion**

12 In the present study which principally aimed at investigating mediating and moderating roles of  
13 theoretically relevant factors, specifically sense of coherence, adaptive coping style and social  
14 support between exposure to traumatic events and psychological symptoms, findings supporting  
15 previous studies were obtained. Sense of coherence partially mediated but not moderated the  
16 effect of exposure to pre and post traumatic events on symptoms of PTSD and depression; task-  
17 oriented coping also partially mediated but not moderated the effect of exposure to post-  
18 migration traumatic events on PTSD. However, social support moderated the effect of post-  
19 migration living difficulties on symptoms of depression, whereas emotion-oriented coping  
20 strategy moderated the effect of exposure to pre-migration trauma on symptoms of PTSD and  
21 depression.  
22

23 The present finding that duration of stay in refugee camp which seems to exacerbate symptoms  
24 is consistent with previous findings in Australia,<sup>37</sup> which reported that prolonged detention and  
25 temporary protection of refugees contribute substantially to the risk of PTSD and depression as  
26 well as other mental health-related disabilities. An increase in the magnitude of emotion-  
27 oriented and task-oriented coping styles with increased exposure to pre-migration and post-  
28 migration living difficulties respectively, is in line with previous findings of Tibetan refugees in  
29 India.<sup>5</sup>  
30

31 Our finding that sense of coherence being associated with reduced symptoms of PTSD and  
32 depression is in line with the literature that describes inverse association between sense of  
33 coherence and psychological distress in many cultural contexts.<sup>3, 8-9, 30</sup> On the other hand, sense  
34 of coherence seems to mediate the association between traumatic events and psychological  
35 symptoms in this study which is again in agreement with previous findings.<sup>3-4</sup> However, its  
36 moderating role between exposure to trauma and psychological symptoms reported in other  
37 studies<sup>7-9</sup> was not found in this study.  
38  
39  
40

41 Our finding is in line with previous evidence regarding the moderating role of social support,<sup>11-  
42 12,40</sup>. However, unlike the recent study which indicated perceived social support has moderated  
43 the effect of exposure to trauma on symptoms of PTSD among Eritrean and Sudanese asylum  
44 seekers in Israel,<sup>40</sup> the current findings demonstrated that social support has moderated the  
45 effect of exposure to post-migration trauma on symptoms of depression.  
46

47 Task-oriented coping style seems to have mediated the relationship between exposure to post-  
48 migration trauma and symptoms of PTSD which signifies the importance of this coping strategy  
49 for Eritrean refugees; however, task-oriented coping didn't moderate the effect of exposure to  
50 trauma on psychological health reported in previous studies, including report of findings from  
51 samples of displaced Ethiopians from Eritrea who were living in temporary shelters in  
52 Ethiopia.<sup>10</sup> On the other hand, avoidance-oriented coping style was not found beneficial in this  
53 study unlike what was reported in Ethiopia and Congo where avoidance-coping strategy was  
54 found beneficial.<sup>10,16</sup> The likely explanation for this is the composition of refugee participants  
55  
56  
57  
58  
59  
60



1  
2  
3 where most of them were literate, having urban-orientation, and relatively assertive culture of  
4 Eritreans, which was also triangulated in Focus Group Discussions (reported elsewhere). Our  
5 finding regarding the association between depression and PTSD supported what was reported in  
6 the Zimbabwean sample. The beneficial effect of the interaction between emotion-oriented  
7 coping style and task-oriented coping style, for depression for both sexes is in line with the  
8 report from the Democratic Republic of Congo.<sup>10</sup> Our findings that PTSD symptoms are  
9 differentially associated with post-migration trauma in females, not in males, implies the  
10 ongoing gender-based vulnerability of female refugees to post migration abuses in the refugee  
11 camps, which are also reported in previous studies conducted in Ethiopian refugee camps.<sup>38-39</sup>  
12 The association between emotion-oriented coping style and reduced symptoms of PTSD, when  
13 it interacts with threat for life sub-scale of pre-migration difficulties may imply that this coping  
14 style has potential benefit for those persons who encountered life threatening trauma. This  
15 coping strategy may be helpful for release of long held traumatic memories, thereby reducing  
16 their PTSD symptoms. The moderating effect of emotion-oriented coping strategy for pre-  
17 migration abuse (sexual and physical) in reducing symptoms (PTSD and depression) implies its  
18 potential use for refugees who had experienced abuse in Eritrea to deal with symptoms of both  
19 conditions. The protective role of this coping style was also reported by previous studies in  
20 African humanitarian settings.<sup>10, 16</sup>  
21  
22  
23  
24

### 25 **Implications of findings for refugees' mental health care**

26 The differential association of PTSD symptoms with post-migration living difficulties for  
27 females, not for males, may necessitate the need to focus for intervention for the ongoing effect  
28 of post-migration traumatic abuses uniquely for female refugees. The finding that duration of  
29 stay in camp which seems to mediate the effect of pre-migration trauma on PTSD calls for  
30 accelerated integration of the refugees with the host society. Enhancement of social support for  
31 the refugees also seems to be crucial, because this study has shown that it has a fairly strong  
32 positive association with increased sense of coherence, which in turn is associated with  
33 decreasing symptoms of PTSD and depression; it has also modified the effect of post-migration  
34 living difficulties on depression. The finding that task-oriented and emotion-focused coping  
35 styles seem to have benefited for release of long held negative feelings about the trauma is useful  
36 information obtained from the present study. Future studies should focus on prospective cohort  
37 as well as longitudinal study designs to fully confirm the present findings from Eritrean samples  
38 in humanitarian settings.  
39  
40  
41

42 **Acknowledgments:** We would like to thank ARRA for the permission to conduct this study. We would also like to express our  
43 sincere appreciation for healthcare staff of ARRA in Shire and Mai Aini for their unreserved support during the entire period of  
44 data collection, and all the participants of the study who shared their experiences without reservation.

45 **Funding:** This study was financially supported by Addis Ababa University and University of Gondar, Ethiopia

46 **Data availability and sharing:** All necessary data to understand in MS is included in tables or text within the MS. The raw data  
47 in SPSS format will be deposited in the Department of Psychiatry, AAU, and can be accessed in accordance with data sharing  
48 policy of Institutional Review Board (IRB) of College of Health Sciences, Addis Ababa University.

49 **Authors' contributions:** BG led the generation of the research idea, design and methods of the study, writing the research  
50 protocol, validating measures, data collection, analysis, interpretation and writing of the findings. AA has made contribution in  
51 revising the research protocol, the research design, validation of measures, analysis and interpretation of data, and critically  
52 reviewing the final manuscript. GM made contribution in checking and editing the statistical analysis, critically reviewing of the  
53 drafted manuscript, and approved the final version.  
54  
55

56 **Ethical Considerations:** This study had ethical clearance from Institutional Ethical Review Board (IRB) of College of Health  
57  
58



Sciences, Addis Ababa University. Participants were provided with information sheet about the study regarding its objective, relevance, beneficence, risk, participant's rights and others. Then a written consent from each participant was obtained before engaging them to participate. Ethical issues as outlined by declaration of Helsinki for human participants in medical research<sup>41</sup> were adhered.

**Competing interests:** Authors declare that there is no conflict of interest.

## References

1. Idemudia ES, Williams JK, Wyatt G. Gender difference in Trauma and Post traumatic Stress Symptoms among Displaced Zimbabweans in South Africa. *J Trauma Stress Disorder Treat* 2013; 2(3): 1340.
2. Brumsey AD, Joseph NT, Myers HF, et al. Modeling the Relationship between Trauma and Psychological Distress among HIV-Positive and HIV-Negative Women. *Psychol Trauma*, 2013; 5(1): 69–76.
3. Nosheen,A, Riaz,MN, Batoor,N. Cross-Cultural Study on Social Support, Sense of Coherence and Outcomes in Pakistan and Germany. *Pakistan Journal of Commerce and Social Sciences* 2014; 8 (2):445- 452.
4. Veronese G, Pepe A. Sense of coherence mediates the effect of trauma on the social and emotional functioning of Palestinian health providers. *American Journal of Orthopsychiatry* 2014; 84(5): 597-606.
5. Sachs B, Rosenfeld B, Lhewa,D, et al. Entering Exile: Trauma, Mental Health, and Coping Among Tibetan Refugees Arriving in Dharamsala, India. *Journal of Traumatic Stress* 2008; 21(2): 199–208.
6. Lincoln, Chatters, Taylor. Social Support, Traumatic Events, and Depressive Symptoms among African Americans. *J Marriage Fam.* 2005; 67(3): 754–766.
7. Pham PN, Vinck P, kinkodi DK, et al. Sense of coherence and its Association with Exposure to traumatic events, post traumatic stress disorder, and depression in Eastern Democratic Republic of Congo. *Journal of Traumatic Stress* 2010; 23( 3) :313–321.
8. Almedom A, Tesfamichael B, Mohammed ZS, et al. Use of 'sense of coherence (soc) scale to measure resilience in Eritrea: Interrogating both the data and the scale. *J.biosoc.Sci* 2007; 39: 91–107.
9. Aljurany H. Personality characteristics, trauma and symptoms of PTSD: A population based study in Iraq. *PhD dissertation*, Heriot Watt University, 2013.
10. Cherewick M, Tol W, Burnham G,Doocy S, et al. A structural equation model of conflict-affected youth coping and resilience. *Health Psychology and Behavioral Medicine* 2016; 4(1): 155–174.
11. Al-Issa I, Tousignant M. Ethnicity Immigration and psychopathology, plenum Press, New York, *Careless Press Publishers*, Philadelphia 1997; U.S.A.
12. Dalgard OS, Dowrick C, Lehtinen V, et al. Negative life events, social support and gender difference in depression: A multinational community survey with data from the ODIN study. *Soc Psychiatry Psychiatr Epidemiol* 2006; 41: 444-451.
13. Voges MA. and Romney DM. Risk and Resiliency Factors in Post Traumatic Stress Disorder, *Annals of General Hospital Psychiatry* 2003; 2:4, <https://doi.org/10.1186/1475-2832-2-4>
14. HoobermanJ, Rosenfeld B, Rasmussen A, et al. Resilience in Trauma-Exposed Refugees: The Moderating Effect of Coping Style on Resilience Variables. *American Journal of Orthopsychiatry* 2010; 80 (4):557–563.
15. Li M. The Relationship among Sense of Coherence, Coping Strategies, and Interpersonal Patterns: A Cross-Cultural Study, *American Counseling Association*, VISTAS online 2015; 63:1-10.
16. Araya M,Chotai J, KomproeJ.H, de Jong JTV. Gender differences in traumatic life events, coping strategies, perceived social support and socio-demographics among post-conflict displaced persons in Ethiopia. *Social psychiatry Psychiatric epidemiol* 2007; 42: 307-315.
17. Cochran WG. Sampling Techniques, 2<sup>nd</sup> Edition, John and Sons, Inc Wiley; 1963, New York.
18. de Jong JT, Komproe IH, Van Ommeren M, et al: Lifetime Events and Posttraumatic Stress Disorder in 4 Post-conflict Settings, *Journal of American Medical Association*, 2007; 266(5):255-262.
19. OnyutLP, Patience L, Neuner F, et al. The Nakivale Camp Mental Health Project: Building Local Competency for Psychological assistance to Traumatized Refugees, *Intervention* 2004; 2(2): 90-107.
20. Kamau M, Silove D,Steel Z, Catanzaro R, et al. Psychiatric Disorders in an African Refugee Camp. *Intervention* 2004; 2(2):84 –89
21. Idemudia ES, Williams JK, Madu SN, et al. Trauma Exposures and Post traumatic Stress among Zimbabwean refugees in South Africa. *Life Science Journal* 2013; 10 (3): 2397-2497.

22. Radloff, LS. The CES-D Scale: A Self-Report Depression Scale for Research in the General Population. *Applied Psychological measurement* 1977; 1(3): 385-401.
23. Moges MF. Translation And Adaptation Of The Center For Epidemiologic Studies-Depression (CES-D) Scale into Tigrigna Language For Tigrigna Speaking Eritrean Immigrants in the United States (Phd Thesis), University of South Florida, *ProQuest Dissertations Publishing* 2011; 3464689.
24. Prins A, Ouimette C, Kimerling R, et al. The primary care PTSD screen (PC-PTSD): development and operating characteristics. *Primary Care Psychiatry* 2003; 9(1): 9-14.
25. Bileuse PD, Wright KM, Adler AB, et al. Validating the Primary Care Post Traumatic Stress Disorder screen and the Post traumatic Stress Disorder Checklist with soldiers returning from combat. *Journal of Consulting and Clinical Psychology* 2008; 76(2):272–281.
26. Hoge CW, Auchterlonie JL, Milliken CS. Mental health problems, use of mental health services, and attrition from military service after returning from deployment to Iraq or Afghanistan. *Journal of the American Medical Association* 2006; 295:1023-1032.
27. Taylor EM, Yanni EA, Pezzi C, et al. Physical and Mental Health Status of Iraqi Refugees Resettled in the United States. *J Immigr Minor Health* 2014; 16(6): 1130–1137.
28. Caitlin M. Somali Refugee Interpretations of trauma-related Mental Illness: Similarities and Differences between the Somali concepts of ‘MurugoJooqto’ and ‘Qulub’ and PTSD, *Undergraduate Research Journal at the University of Northern Colorado* 2013;3:1.
29. Araya M. Post-conflict internally displaced persons in Ethiopia: Mental Distress and Quality of life in relation to Traumatic Life events, Coping Strategy, Social support, and Living Conditions, *PhD Dissertation*, Printed by Print & Media, Umea University 2007;Umeå, 2003889.
30. Antonovsky A. The structure and properties of sense of coherence scale. *Social Science & Medicine*1994;36(6): 725-733.
31. Mahammadzadeh A, Poursharifi H, Alipour, A. Validation of Sense of Coherence (SOC) 13-item scale in Iranian sample. *Procedia Social and Behavioral Sciences* 2010; 5(2010): 1451–1455.
32. Eriksson M, Lindstro B. Validity of Antonovsky’s sense of coherence scale: a systematic review. *J Epidemiol Community Health* 2005; 59: 460–466.
33. Abiola T,Udofia O,Zakari M. Psychometric properties of the 3-Item Oslo Social Support Scale among Clinical Students of Bayero University, Kano, Nigeria; *Malaysian Journal of Psychiatry* 2013; 22:2.
34. Ommern MV and de Jong JTV. Preparing instruments for cross-cultural research. Use of the translation monitoring form with Nepali speaking Bhutanese refugees, *Trans-cultural psychiatry* 1999; 36(3):285-301.
35. Lynn MR. Determination and Quantification Of Content Validity. *Nursing Research* 1986; 35(6): 382–386.
36. Polit DF and Beck CT. The Content Validity Index: Are you sure you know what’s being reported? Critique and recommendations. *Research in Nursing & Health*, 2006; 29: 489–497.
37. Steel Z, Silove D, Brooks R, et al. Impact of immigration detention and temporary protection on the mental health of refugees. *British Journal of Psychiatry* 2005; 188(1): 58-64.
38. Feseha G. G/mariam A and Gerbaba M. Intimate Partner Physical Violence among Women in Shimelba Refugee Camp, Northern Ethiopia, *BMC Public Health* 2012; 12(125):1-10.
39. Wirtz, AL, Glass N, Pham K, Abera A, Rubenstein LS, Singh S, et al. Development of a screening tool to identify female survivors of gender-based violence in a humanitarian setting: Qualitative evidence from research among refugees in Ethiopia. *Conflict and Health* 2013; 7:13, doi: 10.1186/1752-1505-7-13.
40. Nakasha O, Nagara M, Shoshania A, et al. The association between perceived social support and post traumatic stress symptoms among Eritrean and Sudanese male asylum seekers in Israel. *International Journal of Culture and Mental Health* 2017; doi - 10.1080/17542863.2017.1299190.
41. World Medical Association Declaration of Helsinki: Ethical Principles of Medical Research Involving Human Subjects. *Bulletin of the World Health Organization* 2001; 79(4):373-374.
42. Women’s Refugee Commission).Young and Astray, An Assessment of Driving the Movement of An Accompanied Children and Adolescents from Eritrea into Ethiopia, Sudan and Beyond. 2013; New York.
43. United Nations Higher Commissioner for Refugees. Ethiopia, Operational Overview: Camp Demographic Population statistics by Office and Region (As of 31 August 2013).  
<https://reliefweb.int/sites/reliefweb.int/files/resources/Auguststatisticspackage.pdf>
44. Schreiber JB, Nora A,Stage FK, Barlow EA, King J. Reporting Structural Equation Modeling and Confirmatory Factor Analysis Results: A Review. *The Journal of Educational Research* 2006; 99(6):323-337.

Figure-1: Path model depicting direct and indirect (mediated) association between exposure to trauma and mental health outcomes.

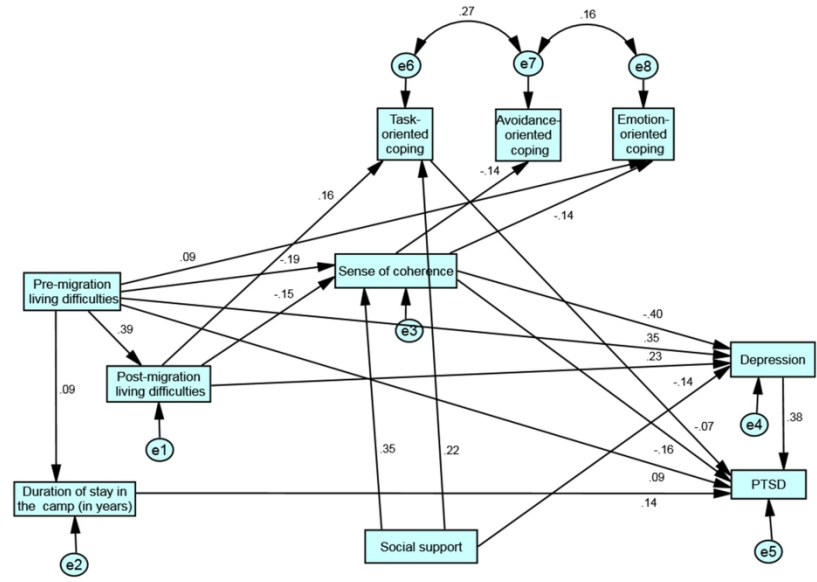

Legend: All paths are depicting standardized significant coefficients. Rectangles represent observed variables, circles represent disturbance (error) terms; one sided arrows together with coefficient values are equivalent to regression beta weights between the two variables; double headed arrows represent co-variances between error terms.

279x238mm (300 x 300 DPI)

## Information Sheet

**Study Name**-Post Traumatic Stress Disorder and Depression among Eritrean Refugees in Ethiopia: their Contextual Relevance and Implications for Intervention

**Principal investigator**- Berhanie Getnet

**Institution**-Addis Ababa University, College of Health Sciences, Department of Psychiatry, Addis Ababa

**Aim**-Little is known about the experience of trauma, conceptualization of Post Traumatic Stress Disorder and depression and source of coping and healing among Eritrean refugees in Ethiopian camps. Therefore, the present study is principally aimed at understanding the lived experiences about reactions to traumatic experiences sources of coping and cultural healing( ritual as well as spiritual) so that it is possible to make important recommendation for designing culturally appropriate trauma intervention for this target community. Although the study is devoted entirely for academic purpose (PhD thesis), the summary of the outcomes of this study will be shared to important stake holders and service providers thinking that there will be improvement in the service with respect to trauma intervention to the refugee community. Since your genuine responses are highly vital for the success of this study, I would like thank you for your genuine and active participation in anticipation.

**Expectation of the participant**-We are expecting you to respond anonymously to questions of survey about your personal details, why you come to Ethiopia, your pre-migration, transit and post -migration experiences of trauma, perceived experiences of coping and healing which will take no more than an hour.

**Voluntary Participation**-Participation in this study is completely voluntary and therefore, you have the right to terminate your participation. You have also the right to skip from giving response to some questions if you felt embarrassed or not willing to share.

**Confidentiality**-Your formation obtained during data collection will be completely kept confidential at the process of research as well as after completion of the study. Your names will remain anonymous while reporting the results of the study, and hence we would like you ensure that your names will not appear in any publications of research.

**Harm** - Unless carefully managed, we believe that the side effects (i.e. harm) of collecting data using instruments that asks refugee participants to recollect past and current stressful life events and present feelings of distress will potentially trigger unnecessary discomfort and negative emotional feelings during the process of data collection.

### Benefit

Refugees are among a high risk of special population who are more likely prone to multiple emotional, sexual and physical abuses, and hence great care will be taken to safeguard your emotional safety while collecting data. Although this study may provoke some discomfort while remembering and discussing some stressful memories and your current psychological distress, it has an immediate as well as long run benefits. Those few participants who felt overwhelmed by the questionnaire or interview as well as have shown acute symptoms of distress will be given the necessary counseling emotional debriefing, referral to counselors as well as medications, according to the nature and severity of their problem. The outcome of the study will be shared to important governmental as well as humanitarian stakeholders (including UNHCR, IOM and ARRA) for the ultimate benefit of improving the mental health services.

**Questions about Research**-If you would like to ask any further information about this research, or would like to obtain further clarification about its purpose, methods and procedures, questionnaire items, you may contact to the principal investigator, Berhanie Getnet via email as well as mobile telephone. My email is [berhanie.getnet.bg@gmail.com](mailto:berhanie.getnet.bg@gmail.com) and mobile telephone is (+251)911-33-62-95. In case you need more information about this study you can also directly contact the Institute of Review Board (IRB) in Addis Ababa University, College of health sciences with an address of office telephone +251118961396.

### Consent Form

**Study Name-**Post Traumatic Stress Disorder and Depression among Eritrean Refugees in Ethiopia: their Contextual Relevance and Implications for Intervention

**Principal Investigator- Berhanie Getnet**

I read the information sheet and understand the purpose of this research and I hereby give my consent to participate in this study having in mind that I agree on the following points:

Please, check in the boxes

1. For my questions and doubts which I need further clarity, I was given sufficient clarifications.
2. I fully understand that participation is completely voluntary and I am free to terminate my participation and demand to cancel the Information I gave in case I feel it put my health as well as legal rights at risk.
3. I understand that information regarding my name and personal details will be kept confidential in security key and only accessed by the investigators.
4. I agree that the researchers can use the information I will give anonymously when making scientific report.
5. I give my consent to be audio taped, photographed or video recorded while I will provide the interview
6. I am volunteer to take part in this study and express my consent by my Signature below

Name \_\_\_\_\_ Signature \_\_\_\_\_ Date \_\_\_\_\_

Name and signature of a person asking the consent (other than investigator)

Name \_\_\_\_\_ Signature \_\_\_\_\_ Date \_\_\_\_\_

Name and Signature of investigator

Name \_\_\_\_\_ Signature \_\_\_\_\_ Date \_\_\_\_\_



|                                                                                   |                                                                                                                                                                                |                                                                                                    |
|-----------------------------------------------------------------------------------|--------------------------------------------------------------------------------------------------------------------------------------------------------------------------------|----------------------------------------------------------------------------------------------------|
|  | <p align="center"><b>Addis Ababa University College of Health<br/>Science Institutional Review Board</b></p> <p><b>Title:</b><br/><b>3.2. Use of Study Assessment Form</b></p> | <p>SOP# AAUMF 008<br/>Version 2.0<br/>Effective date:<br/><b>1 Feb. 2009</b><br/>Page 13 of 13</p> |
|-----------------------------------------------------------------------------------|--------------------------------------------------------------------------------------------------------------------------------------------------------------------------------|----------------------------------------------------------------------------------------------------|

**ANNEX 3**

Form AAUMF 03-008

**IRB's Decision**

Meeting No:001/15

Date: January, 2015

Protocol number: 052/14/Psy

Assigned No.....

|                                                                                                                                                                                         |                                                                                                                                                                                         |
|-----------------------------------------------------------------------------------------------------------------------------------------------------------------------------------------|-----------------------------------------------------------------------------------------------------------------------------------------------------------------------------------------|
| <p><b>Protocol Title:</b> Post-traumatic stress disorder &amp; depression among Eritrean refugees in an Ethiopian camp. Their contextual relevance and implication for intervention</p> |                                                                                                                                                                                         |
| Principal Investigators:                                                                                                                                                                | Berhanie Getnet                                                                                                                                                                         |
| Institute:                                                                                                                                                                              | CHS-AAU                                                                                                                                                                                 |
| Elements Reviewed (AAUMF 01-008)                                                                                                                                                        | <input checked="" type="checkbox"/> Attached <input type="checkbox"/> Not attached                                                                                                      |
| Review of Revised Application<br><input type="checkbox"/> Yes <input type="checkbox"/> No                                                                                               | Date of Previous review:                                                                                                                                                                |
| Decision of the meeting:                                                                                                                                                                | <input checked="" type="checkbox"/> <b>Approved</b> <input type="checkbox"/> Approved with Recommendation<br><input type="checkbox"/> Resubmission <input type="checkbox"/> Disapproved |

- I.Elements approved-
1. Protocol Version No. ....
  2. Protocol Version Date.....
  3. Informed consent Version No. ....
  4. Informed Consent Version Date .....

- II. Obligations of the PI-
1. Should comply with the standard international & national scientific and ethical guidelines
  2. All amendments and changes made in protocol and consent form needs IRB approval
  3. The PI should report SAE within 10 days of the event
  4. End of the study, including manuscripts and thesis works should be reported to the IRB

III. TO ESTM

Institution Review Board (IRB) Approval: Period from **02/02/2015** to **01/02/2016**\_

Follow up report expected in

3 Months \_\_\_      6 months \_\_\_      9 months \_\_\_      one year \_\_\_

**Chairperson, IRB**  
Dr. Yimtubezinash Woldeamanuel  
Signature \_\_\_\_\_  
Date: **02/02/2015**

**Associate Dean for  
Postgraduate and Research**  
Signature \_\_\_\_\_  
Date \_\_\_\_\_

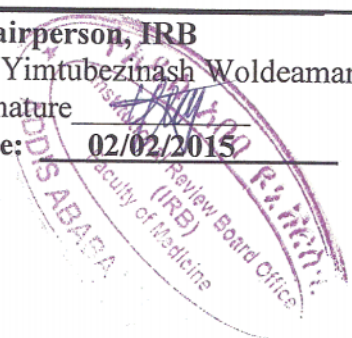



## Symptoms of Post Traumatic Stress Disorder and Depression among Eritrean refugees in Ethiopia: Identifying Direct, Meditating and Moderating Predictors from Path Analysis

### STROBE 2007 (v4) Statement—Checklist of items that should be included in reports of *cross-sectional studies*

| Section/Topic            | Item # | Recommendation                                                                                                                                                                       | Reported on page # |
|--------------------------|--------|--------------------------------------------------------------------------------------------------------------------------------------------------------------------------------------|--------------------|
| Title and abstract       | 1      | (a) Indicate the study's design with a commonly used term in the title or the abstract                                                                                               | 2                  |
|                          |        | (b) Provide in the abstract an informative and balanced summary of what was done and what was found                                                                                  | 2                  |
| <b>Introduction</b>      |        |                                                                                                                                                                                      |                    |
| Background/rationale     | 2      | Explain the scientific background and rationale for the investigation being reported                                                                                                 | 2,3                |
| Objectives               | 3      | State specific objectives, including any prespecified hypotheses                                                                                                                     | 3                  |
| <b>Methods</b>           |        |                                                                                                                                                                                      |                    |
| Study design             | 4      | Present key elements of study design early in the paper                                                                                                                              | 4                  |
| Setting                  | 5      | Describe the setting, locations, and relevant dates, including periods of recruitment, exposure, follow-up, and data collection                                                      | 3                  |
| Participants             | 6      | (a) Give the eligibility criteria, and the sources and methods of selection of participants                                                                                          | 4                  |
| Variables                | 7      | Clearly define all outcomes, exposures, predictors, potential confounders, and effect modifiers. Give diagnostic criteria, if applicable                                             | 4                  |
| Data sources/measurement | 8*     | For each variable of interest, give sources of data and details of methods of assessment (measurement). Describe comparability of assessment methods if there is more than one group | 5-6                |
| Bias                     | 9      | Describe any efforts to address potential sources of bias                                                                                                                            | 4,6                |
| Study size               | 10     | Explain how the study size was arrived at                                                                                                                                            | 4                  |
| Quantitative variables   | 11     | Explain how quantitative variables were handled in the analyses. If applicable, describe which groupings were chosen and why                                                         | 6                  |

|                          |     |                                                                                                                                                                                                              |       |
|--------------------------|-----|--------------------------------------------------------------------------------------------------------------------------------------------------------------------------------------------------------------|-------|
| Statistical methods      | 12  | (a) Describe all statistical methods, including those used to control for confounding                                                                                                                        | 6     |
|                          |     | (b) Describe any methods used to examine subgroups and interactions                                                                                                                                          | 6     |
|                          |     | (c) Explain how missing data were addressed                                                                                                                                                                  | 4     |
|                          |     | (d) If applicable, describe analytical methods taking account of sampling strategy                                                                                                                           | 4     |
|                          |     | (e) Describe any sensitivity analyses                                                                                                                                                                        |       |
| <b>Results</b>           |     |                                                                                                                                                                                                              |       |
| Participants             | 13* | (a) Report numbers of individuals at each stage of study—eg numbers potentially eligible, examined for eligibility, confirmed eligible, included in the study, completing follow-up, and analysed            | NA    |
|                          |     | (b) Give reasons for non-participation at each stage                                                                                                                                                         | NA    |
|                          |     | (c) Consider use of a flow diagram                                                                                                                                                                           |       |
| Descriptive data         | 14* | (a) Give characteristics of study participants (eg demographic, clinical, social) and information on exposures and potential confounders                                                                     | 4,6-7 |
|                          |     | (b) Indicate number of participants with missing data for each variable of interest                                                                                                                          | NA    |
| Outcome data             | 15* | Report numbers of outcome events or summary measures                                                                                                                                                         | NA    |
| Main results             | 16  | (a) Give unadjusted estimates and, if applicable, confounder-adjusted estimates and their precision (eg, 95% confidence interval). Make clear which confounders were adjusted for and why they were included | 8     |
|                          |     | (b) Report category boundaries when continuous variables were categorized                                                                                                                                    | NA    |
|                          |     | (c) If relevant, consider translating estimates of relative risk into absolute risk for a meaningful time period                                                                                             | NA    |
| Other analyses           | 17  | Report other analyses done—eg analyses of subgroups and interactions, and sensitivity analyses                                                                                                               | 10    |
| <b>Discussion</b>        |     |                                                                                                                                                                                                              |       |
| Key results              | 18  | Summarise key results with reference to study objectives                                                                                                                                                     | 11    |
| Limitations              | 19  | Discuss limitations of the study, taking into account sources of potential bias or imprecision. Discuss both direction and magnitude of any potential bias                                                   | 2     |
| Interpretation           | 20  | Give a cautious overall interpretation of results considering objectives, limitations, multiplicity of analyses, results from similar studies, and other relevant evidence                                   | 2     |
| Generalisability         | 21  | Discuss the generalisability (external validity) of the study results                                                                                                                                        | 12    |
| <b>Other information</b> |     |                                                                                                                                                                                                              |       |
| Funding                  | 22  | Give the source of funding and the role of the funders for the present study and, if applicable, for the original study on which the present article is based                                                | 13    |

NA-Not Applicable

1  
2  
3  
4  
5  
6  
7  
8  
9  
10  
11  
12  
13  
14  
15  
16  
17  
18  
19  
20  
21  
22  
23  
24  
25  
26  
27  
28  
29  
30  
31  
32  
33  
34  
35  
36  
37  
38  
39  
40  
41  
42  
43  
44  
45  
46

\*Give information separately for cases and controls in case-control studies and, if applicable, for exposed and unexposed groups in cohort and cross-sectional studies.

**Note:** An Explanation and Elaboration article discusses each checklist item and gives methodological background and published examples of transparent reporting. The STROBE checklist is best used in conjunction with this article (freely available on the Web sites of PLoS Medicine at <http://www.plosmedicine.org/>, Annals of Internal Medicine at <http://www.annals.org/>, and Epidemiology at <http://www.epidem.com/>). Information on the STROBE Initiative is available at [www.strobe-statement.org](http://www.strobe-statement.org).

For peer review only

# BMJ Open

## Symptoms of Post Traumatic Stress Disorder and Depression among Eritrean refugees in Ethiopia: Identifying Direct, Mediating and Moderating Predictors from Path Analysis

|                                 |                                                                                                                                                                                                                                  |
|---------------------------------|----------------------------------------------------------------------------------------------------------------------------------------------------------------------------------------------------------------------------------|
| Journal:                        | <i>BMJ Open</i>                                                                                                                                                                                                                  |
| Manuscript ID                   | bmjopen-2017-021142.R1                                                                                                                                                                                                           |
| Article Type:                   | Research                                                                                                                                                                                                                         |
| Date Submitted by the Author:   | 25-May-2018                                                                                                                                                                                                                      |
| Complete List of Authors:       | Getnet, Berhanie; Addis Ababa University School of Medicine, Psychiatry<br>Medhin, Girmay; Addis Ababa University, Aklilu Lemma Institute of Pathobiology<br>Alem, Atalay; Addis Ababa University School of Medicine, Psychiatry |
| <b>Primary Subject Heading</b>: | Mental health                                                                                                                                                                                                                    |
| Secondary Subject Heading:      | Epidemiology                                                                                                                                                                                                                     |
| Keywords:                       | Mediation, Moderation, Post Traumatic Stress Disorder, Depression, Eritrean refugees                                                                                                                                             |
|                                 |                                                                                                                                                                                                                                  |

SCHOLARONE™  
Manuscripts

1  
2  
3 **Symptoms of Post Traumatic Stress Disorder and Depression among Eritrean refugees in**  
4 **Ethiopia: Identifying Direct, Meditating and Moderating Predictors from Path Analysis**  
5

6 Berhanie Getnet,<sup>1\*</sup> M.A., Girmay Medhin,<sup>2</sup> M.Sc., Ph.D., Atalay Alem,<sup>1</sup> M.D., Ph.D  
7

8 **Corresponding Author:** Berhanie Getnet,; College of Health Sciences, Department of Psychiatry, Addis Ababa University;  
9 Addis Ababa, Ethiopia; email address: berhanie.getnet.bg@gmail.com ; Cell phone: +251911336295  
10

11 <sup>1</sup>College of Health Sciences Department of Psychiatry, Addis Ababa University; Addis Ababa, Ethiopia

12 <sup>2</sup>Aklilu Lemma Institute of Pathobiology, Addis Ababa University, Addis Ababa, Ethiopia  
13  
14  
15  
16  
17  
18  
19  
20  
21  
22  
23  
24  
25  
26  
27  
28  
29  
30  
31  
32  
33  
34  
35  
36  
37  
38  
39  
40  
41  
42  
43  
44  
45  
46  
47  
48  
49  
50  
51  
52  
53  
54  
55  
56  
57  
58  
59  
60

For peer review only

## Abstract

**Objective:** This study aimed at testing the significance of mediating and moderating roles of sense of coherence, adaptive coping styles and social support in the relationship between exposure to trauma and psychological symptoms.

**Methods:** A cross-sectional survey design was employed to collect data. The study was carried out in Mai Aini refugee camp, Ethiopia. 562 adult refugees aged 18-74 were randomly selected from eligible Eritrean refugee community living in the camp to screen for depression and PTSD and to look for associated factors. Data were collected using Pre and post-migration living difficulties checklist, Center for Epidemiologic Studies Depression Scale (CES-D), Primary Care PTSD Screener (PC-PTSD), Coping style scale, Sense of Coherence scale (SoC-13), and Oslo Social Support scale (OSS-3). Path modeling was used to test the mediation and moderation effects of pre-specified factors.

**Results:** Pre-migration living difficulties were directly associated with symptoms of PTSD ( $\beta=0.09$ ,  $p < 0.05$ ), and indirectly associated with PTSD through paths of duration of stay in camp, sense of coherence, post-migration living difficulties, task-oriented coping style and depression ( $\beta = 0.26$ ,  $p < .01$ ). Pre and post-migration living difficulties were directly associated with depression with standardized estimate of ( $\beta=0.35$ ,  $p < 0.001$ ) and ( $\beta=0.23$ ,  $p < 0.05$ ), respectively. Post-migration living difficulties were indirectly associated with PTSD through paths of sense of coherence, task-oriented coping style and depression ( $\beta = 0.13$ ,  $p < 0.01$ ). Social support moderated the effect of post-migration living difficulties on depression ( $P < 0.05$ ). Emotion-oriented coping style moderated the effect of pre-migration threat for abuse on PTSD ( $\beta = -0.18$ ,  $p < 0.001$ ) and depression ( $\beta = -0.12$ ,  $p < 0.01$ ). It also moderated threat for life on PTSD ( $\beta = -0.13$ ,  $p < 0.001$ ).

**Conclusions:** Sense of coherence and task-oriented coping style partially mediated the association between exposure to trauma and symptoms of depression and PTSD. Emotion-oriented coping style and social support moderated the effect of pre and post-migration living difficulties, respectively. Fostering social support, task-oriented and emotion-oriented coping styles seem to be beneficial for these refugees.

**Key words:** Mediation, moderation, PTSD, depression, Eritrean refugees, Ethiopia

### Strengths and Limitations of this Study

- The strength of this study is that it has examined the moderating and mediating roles of multiple factors, which will give the readers a chance to see the dynamic interplay of personal and environmental factors as determinants of refugees' mental wellbeing. This will give a direction for considering multiple factors in the intervention plan.
- Using tools/measures after rigorously adapting them to the local context may also be viewed as the strength of the present study.
- However, this study has inherent limitations; the cross-sectional design employed in the study will limit to show cause-effect relationship between variables of research interest.
- Since there were no gold standard measures in Tigrigna version normed in the target community to identify cases of PTSD and depression, as well as determine cut-off points for self reported measures employed in the present study, the outcomes in the present study as measured by PC-PTSD and CES-D were described as dimensional constructs using their respective symptoms as outcomes. Thus, one needs to be cautious in the interpretation of the findings.
- Since there is vulnerability of refugees for potential abuses in the host society, the likelihood of response bias on the part of respondents for items asking experiences of post-migration living difficulties cannot be ruled out.



## Background

In the contemporary mental health research in humanitarian settings, to look into the effect of traumatic events on the mental wellbeing of survivors is becoming a common phenomenon. There is also increasing interest to investigate mediators which can be either precipitating risk factors like exposure to post migration trauma,<sup>1</sup> maladaptive coping methods,<sup>2</sup> and protective factors such as sense of coherence<sup>3-4</sup> and adaptive coping strategy.<sup>5</sup> Antonovsky(1987, p.19) defined sense of coherence as: “a global orientation that expresses the extent to which one has a pervasive, enduring though dynamic feelings of confidence that (1) the stimuli deriving from one’s internal and external environments in the course of living are structured and predictable and explicable;(2) the resources are available to one to meet the demands posed by the stimuli; and (3) these demands are challenges worthy of investment and engagement”.<sup>6</sup> The moderating roles of sense of coherence,<sup>7</sup> emotion-oriented coping method,<sup>8</sup> inverse association of social support with depression,<sup>9</sup> and moderating role of social support<sup>10</sup> were also reported. Social support has moderated the effect of exposure to trauma on symptoms of PTSD among Eritrean and Sudanese asylum seekers in Israel.<sup>10</sup>

A study from Tibetan refugees in India indicated that exposure to trauma is positively and significantly associated with coping style and coping style mediated the association between exposure to trauma and symptoms of depression and PTSD.<sup>5</sup> Coping in this regard refers to the psychological process that individuals respond to stressors and life hassles, which plays the mediating role between stress and psychological wellbeing.<sup>11</sup> In another study which compared the use of different coping strategies among victims of PTSD and a control group, it was found that those with PTSD were more likely to use emotion-oriented coping style in dealing with stressful events compared to those without PTSD.<sup>12</sup> The kind of coping style would moderate (strengthen or weaken) the association between the other resilience variables and PTSD symptoms.<sup>13</sup> In the same study, engagement coping style was hypothesized to strengthen the above associations, while disengagement coping style would weaken them.<sup>13</sup> A similar study from sample of the Democratic Republic of Congo indicated that the interaction between emotion-oriented coping strategy and problem-oriented coping strategy (coping flexibility) were associated with lower psychological distress.<sup>8</sup>

Population-based studies in Eritrea and Iraq showed that sense of coherence was found to be negatively associated with PTSD symptoms.<sup>14-15</sup> Cross-cultural studies aimed at determining the relationship between sense of coherence and coping strategies in Chinese and United States participants showed that sense of coherence was predictor of problem solving and avoidance coping strategies.<sup>16</sup> A study from samples of Pakistan and German indicated the mediating role of sense of coherence between social support and stress.<sup>3</sup> Sense of coherence also partially mediated the impact of trauma on both anxiety and social dysfunction in samples of Palestinian emergency health workers.<sup>4</sup>

Findings from analysis of Structural Equation Modeling (SEM) from among Zimbabwean refugees in South Africa showed that post-migration living difficulties mediated the association between pre-migration living difficulties and PTSD.<sup>1</sup> A recent study that focused on the importance of post-migration stressors in ecological model of refugees’ mental health reported that post-migration stressors have consistently been found to predict levels of distress as

1  
2  
3 powerfully as exposure to pre-migration trauma, like exposure to violence.<sup>17</sup> A study in Ethiopia  
4 among internally displaced persons indicated that some sub-scales of coping interact with  
5 displacement related traumatic events leading to have significant association with mental  
6 distress.<sup>18</sup>

7  
8 Continuous migration of Eritrean youth to refugee camps of Ethiopia is owing to different  
9 reasons, which include: economic hardship, political reasons and family reunification.<sup>19</sup> As of  
10 2013, there were 53,035 refugees in four camps (i.e. Mai Aini, Shimelba, Adi harush and  
11 Hitsats).<sup>20</sup> Of these, 37,562 (70.8%) were males. Mai Aini, where this study was conducted, is the  
12 second largest camp where 17,825 refugees resided at the time of the study of whom  
13 11,892 (66.7%) were males.<sup>20</sup> The majority were students, and most of them were unemployed  
14 before coming to Ethiopia.<sup>20</sup> A recent update by United Nations Higher Commissioner for  
15 Refugees (UNHCR) indicates that about 11,718 Eritrean refugees were living in Mai Aini  
16 camp, of which 4,826 (41%) were females.<sup>21</sup>

17  
18 Although there are reports on mediating and moderating roles of sense of coherence, copying  
19 styles, and social support in the association between exposure to trauma and psychological  
20 symptoms in humanitarian settings, to our knowledge there are no such studies in Eritrean  
21 refugees living in Ethiopia. Therefore, the present study aimed at addressing this knowledge gap.

## 22 23 24 25 26 **Hypotheses**

27 After reviewing the literature, our alternative hypotheses for this study were: (a) sense of  
28 coherence and task-oriented coping together mediate the relationship between exposure to pre  
29 and post-migration living difficulties and psychological symptoms (PTSD and depression); (b)  
30 Social support moderates the effect of exposure to traumatic events on symptoms of PTSD and  
31 depression; (c) the interaction between emotion-orientated and task-oriented coping styles are  
32 associated with reduced symptoms of PTSD and depression.

## 33 34 35 **Materials and Methods**

36 **Study setting:** This study was conducted at Mai-Aini refugee camp, 1116 km North of Addis Ababa,  
37 the capital city of Ethiopia. Mai-Ani is one of the refugee camps hosting Eritreans which was established  
38 in 2008 through the support given by the UNHCR to the Ethiopian Government.<sup>19</sup>

## 39 40 41 **Study design**

42 Data for this particular report were collected using a cross-sectional study design.

## 43 44 45 **Sample size estimation**

46 Sample size determination was done taking into account the average PTSD prevalence of  
47 30.73% among refugees in East African camps<sup>22-24</sup> with 4% precision and 95% confidence  
48 interval. Adding 10% for the likely non-response, the final calculated sample size using single  
49 population proportion formula was 562 participants.

## 50 51 **Sampling**

52 Households were taken as a sampling frame for the survey. According to population census  
53 document we were able to obtain from Administration of Refugees and Returnees Affairs  
54 (ARRA) and UNCHR, there were a total of 10,006 registered refugees living in the camp in  
55 December 2015, of whom 4,257 were females and 5,749 males. But, this document contained

1  
2  
3 incomplete information about refugees' addresses, especially for the newly arrived. Thus, we  
4 conducted numbering and making census of households from December 2015 to January, 2016.  
5 A total of 2055 households were registered out of which 100 households were excluded because  
6 they were units for unaccompanied minors (children below the age of 18) Thus, the remaining  
7 1955 households were taken as a sampling frame. Then 562 households were selected using  
8 simple random sampling method. One participant was selected from each household using a  
9 lottery method from among members of the household aged 18 and above. Twenty two of the  
10 selected households were replaced because household members were not found upon three visits  
11 by data collectors. The replacement was done from neighboring households (i.e. from those that  
12 preceded or followed the selected households). Data collection took place from January to  
13 March, 2016. Since the principal investigator (BG) was supervising and monitoring the data  
14 collection on daily basis, missed data were obtained by sending the data collectors back to the  
15 respondents' homes to bring information for those skipped question items.

### 16 **Variables**

17 Symptoms of PTSD and depression were the main outcome variables in this study. Pre and post-  
18 migration living difficulties were considered to be the exposure and main predictor variables.  
19 Sense of coherence, task-oriented coping, emotion-oriented, avoidance-oriented coping styles  
20 and social support were assumed to moderate the effect of exposure to traumatic events on  
21 symptoms of depression and PTSD. Variables such as: Genders, age, marital status, and  
22 educational background, frequency of using religious coping, and duration of stay in the refugee  
23 camp were regarded as potential confounders.

### 24 **Instrument adaptation**

25 All of the instruments used in this study were adapted following standard adaptation procedures  
26 for trans-cultural study.<sup>25</sup> Except for Center for Epidemiologic Studies Depression (CES-D)  
27 Scale, all instruments described below were translated from the source language (English) into  
28 the target language (Tigrigna) by two bilingual experts, and then masked back translated into  
29 English by other two independent bilingual translators. The translations as well as the back  
30 translations were given to an expert panel whose mother tongue was Tigrigna, the language used  
31 for the study. Having the input from the feedbacks obtained from experts, consensus meetings  
32 were held to merge the two translated versions by the translators. The translations were then  
33 rated using a 4-point rating scale for their content relevance by seven experts to obtain content  
34 validity index.<sup>26-27</sup> Following that, cognitive interviews were conducted with six refugees from  
35 the target community, and hence minor revisions were made based on their feedbacks. All  
36 instruments were pilot tested before they were employed in the main study.

### 37 **Patient and public involvement**

38 Since this study involved special vulnerable people, refugees, who were potentially at risk of  
39 mental health problems and violation of their rights, the necessary care was taken when  
40 recruiting participants of the study. The research question and adaptation of outcome measures  
41 were informed by literature review and priorities, preferences as well as experiences of refugees  
42 based on situational analysis study done in the same community one year prior to the current  
43 study (unpublished to date). That study involved interviews with key informants of the refugees  
44 and Focus Group Discussion (FGD) with refugee counselors and Eritrean lay counselors trained  
45 in psychosocial intervention. The participants were ensured about legal protection for their  
46 security that permission letters have been obtained from concerned higher authority, ARRA in  
47 Addis Ababa and its site offices, before they gave us their informed consent. Higher scorers of  
48 PTSD symptoms were encouraged to visit refugee counselors or obtain psychiatric service via  
49  
50  
51  
52  
53  
54  
55  
56  
57  
58  
59  
60

1  
2  
3 local healthcare staff as part of connecting refugees who are at risk to a referral pathway for  
4 mental health care. Findings of this study will be disseminated to participants through workshops  
5 and briefing sessions.

### 6 **Measures**

7  
8 An exposure variable of interest, traumatic events, were measured using *Pre and Post Migration*  
9 *Living Difficulties Checklist*.<sup>1</sup> This tool was developed and used to measure traumatic events of  
10 Zimbabwean refugees in South Africa in pre and post-migration periods. It has 14-item checklist  
11 with five point response format (i.e. strongly disagree score = 1; disagree = 2; neutral = 3; agree  
12 = 4, and strongly agree = 5). Examples of items include: “I was beaten and harassed; I was  
13 sexually harassed”. In order to differentiate those who had encountered trauma from those who  
14 hadn't, the authors re-coded responses 1 to 3 to 0 and 4 & 5 to 1.<sup>28</sup> In the pilot study (n=50),  
15 internal consistency alpha values of 0.86 and 0.83 were obtained for pre-migration and post-  
16 migration living difficulties, respectively. CFA analysis of the main study (n=562) has  
17 demonstrated that the two factor structure of pre-migration living difficulties has shown  
18 acceptable fit to the present data: chi-square ( $\chi^2$ )=172.444; chi-square to degree of freedom  
19 ( $\chi^2/df$ )= 2.874; Comparative Fit Index (CFI) =0.971; Tucker Lewis Index (TLI) =0.951; Root Mean  
20 Square Error of Approximation(RMSEA)=0.058(90%CI=0.048, 0.068); Standardized Root Mean  
21 Residual (SRMR) = 0.0402. In this model the first factor, threat for life (9-items), and the second  
22 factor, threat for abuse (5-items), had good internal consistency (Cronbach's alpha 0.88 and 0.82,  
23 respectively). Two factor structures of post-migration living difficulties have demonstrated  
24 acceptable fit to the present data:  $\chi^2$ =202.576;  $\chi^2/df$  =3.554; CFI=0.950; TLI=0.919; RMSEA=  
25 0.067(90%CI= 0.058, 0.078). The first factor, threat for life (9-items) and the second factor,  
26 threat for abuse (5-items) are internally consistent (Cronbach's alpha values 0.68 and 0.72  
27 respectively). Besides, the item level Content Validity Index (I-CVI) for the fourteen items in  
28 the present study ranged from 0.86 to 1.00. The scale level average content validity index(S-  
29 CVI/Ave) was found to be 0.98.

30  
31  
32  
33  
34 Depression was measured using *Center for Epidemiologic Studies Depression Scale (CES-D)*.<sup>29</sup>  
35 The English version of CES-D is a 20 item scale with four alternative response options;  
36 specifically, ‘None of the time’ to be scored 0 ‘A little of the time’ to be scored 1, ‘Moderate  
37 amount of time’ to be scored 2, and ‘Most of the time’ to be scored 3.<sup>29</sup> One example item  
38 reads: “I was bothered by things that usually do not bother me”. This instrument is designed to  
39 measure depressive symptomatology in the general population.<sup>29</sup> CES-D was translated and  
40 validated into Tigrigna for Tigrigna speaking Eritrean refugees in the United States, and the  
41 adaptation study found alpha value of 0.86 for internal consistency and 0.91 for test re-test  
42 reliability.<sup>30</sup> The internal consistency in the present study demonstrated 0.92 in pilot study  
43 (n=50) and 0.91 in the main study (n=562). After allowing unique values to correlate, Confirmatory  
44 Factor Analysis (CFA) suggested that the present data best fitted best with two dimensions of  
45 negative affect and positive affect with second order single factor model ( $\chi^2$ = 271.65; df=144;  
46 CFI=0.975; TLI= 0.967; SRMR= 0.0378; RMSEA=.04). All the 20 items loaded sufficiently to  
47 either of these two dimensions better than other computing factor structures of CES-D in the  
48 literature. Thus, composite reliability alpha of the two factors negative Affect (16 Items) has an  
49 Alpha value which is 0.93, whereas the positive Affect (4 items) has an alpha value of 0.70  
50 (n=562). Moreover, the I-CVI values for the 20 items ranged from 0.71 to 1.00 and S-CVI/ Ave  
51 for the total scale was found to be 0.92.



1  
2  
3 PTSD was measured using *Primary Care PTSD Screener (PC-PTSD)*.<sup>31</sup> This is a four item  
4 brief screening instrument, having two response options, ‘Yes’ or ‘No’.<sup>31</sup> This scale has one  
5 common instruction for all items, “In your life, have you ever had any experience that was  
6 so frightening, horrible, or upsetting that, in the past month...”. One example from among  
7 items following this instruction is: “Have had nightmares about it or thought about it when  
8 you did not want to?”<sup>31</sup> Test re-test reliability was found to be 0.83.<sup>32</sup> Furthermore, the  
9 sensitivity and specificity of PC-PTSD was 0.78 and 0.87, respectively.<sup>31</sup> The scale was  
10 extensively used to study PTSD among veterans in United States,<sup>31-32</sup> Afghanistan and Iraq,<sup>33</sup> its  
11 use for screening PTSD in refugees is also well documented.<sup>34-35</sup> In the present study, the internal  
12 consistency alpha value was found to be 0.68 in the pilot study (n=50) and 0.64 in the main study  
13 (n=562). Item-total correlation for the four items ranged from 0.59 to 0.75 in the pilot study. For  
14 the four items, Item level Content Validity Index (I-CVI) is 1, which makes the overall Scale  
15 level Item Validity Index (S-IVI) to be 1. Moreover, Principal Component Analysis (PCA)  
16 showed that the four items loaded on a single factor (ranging from 0.582 to 0.818). Similarly,  
17 CFA analysis demonstrated that all the four items, each of which basically represents one factor  
18 structure of PTSD, loaded adequately onto a single dimension, ranging from 0.43 (numbing) to  
19 0.78 (re-experiencing). The present data demonstrated closer fit with a single factor structure of  
20 PTSD with fit indices of  $\chi^2=17.275$ ;  $\chi^2/df= 8.622$ , CFI=0.963; TLI=0.888; RMSEA=0.117  
21 (90%CI=0.070, 0.17), SRMR=0.0355.

22  
23  
24  
25  
26 Coping strategies were measured using a *Coping Style Scale*,<sup>18</sup> which consists 10 items. The  
27 items require participants to respond as “this is not like me” or “this is like me”.<sup>18</sup> The first set of  
28 4-items follow one scenario “Imagine, someone is spreading a damaging gossip about you”. One  
29 example of item that following this reads: “Some people would try to find the person who began  
30 the gossip and discuss it with him/her”.<sup>18</sup> The second set of 6-items follow imaginative scenario  
31 “Imagine that some property of your, money, food or object of value is lost or stolen”, one  
32 example of item following this is “some people would avoid thinking about the lost or  
33 theft”.<sup>18</sup> This instrument was cross-culturally validated by Trans-cultural Psychosocial  
34 Organization (TPO), and later used to study displaced Ethiopians from Eritrea during secession  
35 of Eritrea from Ethiopia.<sup>18,36</sup> This scale roughly captured three coping strategies, including: task-  
36 oriented, avoidance-oriented and emotion-oriented coping strategies.<sup>18</sup> In the present study, the  
37 internal consistency alpha value was found to be 0.61 in the pilot study (n=50) and 0.48 in the  
38 main study (n=562). The three factors of coping have demonstrated reasonable fit to the present  
39 data with exclusion of item-8 ( $\beta =0.014$ ,  $p>0.05$ ). The remaining 9-items also have shown close  
40 fit to the data:  $\chi^2=54.549$ ;  $\chi^2/df=2.273$ ; CFI=0.901; TLI= 0.851; RMSEA=0.048(90%CI=0.031,  
41 0.064).

42  
43  
44  
45  
46 Resilience was measured using *Sense of Coherence Scale (SoC-13)*.<sup>37</sup> This is a 13-item semantic  
47 differential scale adapted for Eritrean culture in the form of a 5-point Likert scale from the  
48 original 7-point scale to reduce complexity.<sup>14</sup> For example, item-1 asks: “Do you have feeling  
49 that you don’t really care about what goes on around you? Response options range from “very  
50 seldom or never’ to be scored as 1 and ‘very often’ to be scored as 5.<sup>14</sup> Responses for the items 1,  
51 2, 3, 7, and 10 were reverse coded as indicated in previous literature.<sup>38</sup> The instrument was  
52 reported to have proved an adequate measure of resilience in Eritrean population.<sup>14</sup> Despite the  
53 conflicting findings regarding the dimensionality of SoC-13,<sup>39</sup> our data in the present study fits  
54 well into a single factor structure, except for item-2. Twelve items have demonstrated significant

1  
2  
3 loadings onto a single factor ( $\chi^2=57.54$ ;  $df=34$ ;  $\chi^2/df=1.69$ ; CFI= 0.98; RMSEA= 0.035), which  
4 gives a supporting evidence that it measures a one dimensional construct as proposed by the  
5 original scale developer.<sup>37</sup> Cronbach's alpha value for internal consistency for pilot study (n=52)  
6 and main study (n=562) were 0.67 and 0.74, respectively.  
7

8  
9 Social support was measured using *Oslo Social Support Scale (OSS-3)*.<sup>9</sup> This is a scale  
10 consisting of three items in which sum scores range from 3-14.<sup>40</sup> In a validation study of OSS-3  
11 in Nigeria, Cronbach's alpha value for internal consistency was found to be 0.5.<sup>40</sup> In our pilot  
12 study (N=52), Cronbach's alpha value was 0.39 and the alpha value for the main study was 0.58  
13 (n=562). CFA showed that all the items significantly and adequately loaded onto a single factor  
14 ranging from 0.49 to 0.68, with fit indices of  $\chi^2=4.233$ ,  $\chi^2/df=4.233$ , CFI=0.978, TLI=0.934,  
15 RMSEA=0.076(90%CI=0.014,0.156). All the items received I-CVI of 1, which makes S-CVI to  
16 be 1 for the total scale.  
17

### 18 **Statistical analysis**

19 Associations and direction of associations tested in this study were hypothesized based on  
20 existing literature. Path analysis was performed to test the significance and direction of  
21 association as well as to identify direct and indirect effect of variables. IBM SPSS Amos,  
22 version, 21 was employed to carry out the path analysis. The effect of interaction among some  
23 coping sub-scales with sub-scales of pre and post-migration living difficulties was calculated by  
24 multiplying the respective variables there by interaction terms were created. Then, the effect of  
25 each interaction term was tested for its significance of association with PTSD, depression or both  
26 using independent path analysis. Item-level Content Validity Index (I-CVI) values of 0.78 or  
27 higher are considered to be valid indices for content validity if the instrument is rated by 6 to 10  
28 experts.<sup>26</sup> In the present study the cut-off values for fit indices of accepted model include: values  
29 of  $\chi^2/df$  less than 3; greater than or equal to 0.95 for CFI; greater than or equal to 0.95 for TLI;  
30 less than or equal to 0.06 to 0.08 for RMSEA, and less than or equal to 0.08 for SRMR.<sup>41</sup>  
31  
32

### 33 **Results**

#### 34 **Characteristics of participants**

35 Of the 562 participants (Table-1), 304(54.1%) were females. Age ranged from 18-74 (with mean  
36 age=29.63, SD=10.18); the majority was literate; the average duration of stay in the refugee  
37 camp was 3.71 years. High proportion of participants belonged to the Tigrinya ethnic group  
38 (92%). Very few participants came from Saho, Bilen, Tigre and Jabelty ethnic groups of Eritrea  
39 constituting 8% altogether. Eighty five percent were followers of Coptic Orthodox Christianity.  
40 They had diverse profile of occupation before coming to Ethiopia, but students, x-soldiers and  
41 farmers constituted 71%.  
42  
43  
44  
45  
46  
47  
48  
49  
50  
51  
52  
53  
54  
55  
56  
57  
58  
59  
60



Table-1: The demographic characteristics of participants

| Characteristics            |                           | Number (%) |
|----------------------------|---------------------------|------------|
| Sex                        | Male                      | 258(45.9)  |
|                            | Female                    | 304(54.1)  |
| Age                        | Mean(SD)                  | 29.6(10.2) |
|                            | 18-24                     | 205 (36.5) |
|                            | 25-34                     | 219(39.0)  |
|                            | 35-44                     | 89(15.8)   |
|                            | 45-54                     | 29(5.2)    |
|                            | 55-64                     | 15(2.5)    |
| Educational Background     | 65-75                     | 5 (0.9)    |
|                            | Non-literate              | 67(11.9)   |
|                            | Elementary school         | 232(41.3)  |
|                            | Secondary school          | 238(42.3)  |
| Marital status             | College graduate or above | 25(4.5)    |
|                            | Single                    | 189(33.6)  |
|                            | Married                   | 327(58.2)  |
|                            | Divorced                  | 29(5.2)    |
| Religion                   | Widowed                   | 17(3.0)    |
|                            | Orthodox                  | 477(84.9)  |
|                            | Protestant                | 17(3.0)    |
|                            | Catholic                  | 23(4.1)    |
|                            | Muslim                    | 44(7.8)    |
| Past occupation in Eritrea | Jehovah witness           | 1(0.2)     |
|                            | Student                   | 201 (35.8) |
|                            | Military                  | 111 (19.8) |
|                            | Farmer                    | 89 (15.8)  |
|                            | Home maid                 | 66 (11.7)  |
|                            | Educator                  | 23 (4.1)   |
|                            | Daily laborers            | 15 (2.7)   |
| Others                     | 57(10.1)                  |            |

### Direct and mediating predictors of PTSD and depression

The path model presented in figure-1 fits to the data well ( $\chi^2=39.97$ ;  $df = 24$ ;  $\chi^2/df = 1.67$ ; CFI=0.985; TLI= 0.972; SRMR=0.05; RMSEA=0.034 (90% CI=0.013, 0.053);  $p=0.022$ ). In examining the paths in detail, both pre-migration ( $\beta=-0.19$ ,  $p<0.001$ ) and post-migration ( $\beta = -0.15$ ,  $p<0.001$ ) trauma are significantly associated with sense of coherence. Sense of coherence in turn is significantly and negatively associated with symptoms of PTSD ( $\beta = -0.16$ ,  $p<0.001$ ) and depression ( $\beta= -0.40$ ,  $p<0.001$ ) (Table-2). Pre-migration living difficulties were directly associated with symptoms of PTSD ( $\beta=0.09$ ,  $p <0.05$ ) and with depression ( $\beta= 0.35$ ,  $p < 0.001$ ). It was also indirectly associated with depression via sense of coherence and post-migration living difficulties. Post-migration living difficulties were directly associated with depression ( $\beta= 0.23$ ,  $p<0.001$ ) and indirectly associated with PTSD via sense of coherence, symptoms of depression, and task-oriented coping style.

Table 2: Path coefficients between predictors and endogenous variables in the path model

| Predictors                  | Endogenous variables      | Unstandardized Estimate(95%,CI) | Standard Error | Standardized Path Coefficient | p-values |
|-----------------------------|---------------------------|---------------------------------|----------------|-------------------------------|----------|
| Pre-migration difficulties  | Post-migration            | 0.21 (0.17, 0.25)               | 0.021          | 0.39                          | p<0.001  |
| Post-migration difficulties | Sense of coherence        | -0.21 (-0.32, -0.10)            | 0.056          | -0.15                         | p<0.001  |
| Pre-migration difficulties  | Sense of coherence        | -0.14 (-0.20, -0.08)            | 0.031          | -0.19                         | p<0.001  |
| Social support              | Sense of coherence        | 1.28 (1.01, 1.55)               | 0.139          | 0.35                          | p<0.001  |
| Sense of coherence          | Depression                | -0.59 (-0.68, -0.50)            | 0.046          | -0.40                         | p<0.001  |
| Pre-migration difficulties  | Depression                | 0.38 (0.31, 0.45)               | 0.034          | 0.35                          | p<0.001  |
| Post-migration difficulties | Depression                | 0.46 (0.34, 0.58)               | 0.062          | 0.23                          | p<0.001  |
| Pre-migration difficulties  | Duration of stay          | 0.02 (0.00, 0.04)               | 0.011          | 0.09                          | p<0.05   |
| Social support              | Depression                | -0.78 (-1.05, -0.51)            | 0.162          | -0.14                         | p<0.001  |
| Post-migration difficulties | Task-oriented coping      | 0.03 (0.01, 0.05)               | 0.008          | 0.16                          | p<0.001  |
| Social support              | Task-oriented coping      | 0.13 (0.09, 0.17)               | 0.022          | 0.22                          | p<0.001  |
| Duration of stay            | PTSD                      | 0.07 (0.04, 0.10)               | 0.017          | 0.14                          | p<0.001  |
| Sense of coherence          | Avoidance-oriented coping | -0.01(-0.02, -0.002)            | 0.004          | -0.14                         | p<0.001  |
| Sense of coherence          | PTSD                      | -0.03 (-0.04, -0.02)            | 0.007          | -0.16                         | p<0.001  |
| Pre-migration difficulties  | PTSD                      | 0.01 (0.00, 0.02)               | 0.005          | 0.09                          | p<0.05   |
| Depression                  | PTSD                      | 0.04 (0.03, 0.05)               | 0.006          | 0.38                          | p<0.05   |
| Task-oriented coping        | PTSD                      | -0.07(-0.14, -0.004)            | 0.038          | -0.07                         | p<0.05   |
| Pre-migration difficulties  | Emotion-oriented coping   | 0.01 (0.004, 0.02)              | 0.003          | 0.09                          | p<0.001  |
| Sense of coherence          | Emotion-oriented coping   | -0.01(-0.02, -0.002)            | 0.004          | -0.14                         | p<0.01   |

Duration of stay in the refugee camp, sense of coherence, post-migration living difficulties, task-oriented coping style and depression together seem to mediate the association between pre-migration living difficulties and PTSD symptoms (standardized indirect coefficient = 0.26, p<0.01). Similarly, task-oriented coping style, sense of coherence and depression combined mediate the association between post-migration living difficulties and PTSD symptoms (standardized indirect coefficient= 0.13, p<0.01) (Table 3).

Table 3: Mediation analysis between exposure to trauma during pre and post- migration period and symptoms (PTSD and depression)

| Hypothesized relationship                      | Mediating variables                                                                                                    | Standardized Direct Effect | Standardized Indirect Effect | Result             |
|------------------------------------------------|------------------------------------------------------------------------------------------------------------------------|----------------------------|------------------------------|--------------------|
| 1. Pre-migration living difficulties → PTSD    | Duration of stay in the camp, sense of coherence, post-migration living difficulties, task-oriented coping, depression | 0.09*                      | 0.26 <sup>‡</sup>            | Partially mediated |
| Post-migration living difficulties → PTSD      | Task-oriented coping, sense of coherence and depression                                                                | -0.05(n.s)                 | 0.13 <sup>‡</sup>            | Partially mediated |
| Pre-migration living difficulties → Depression | Sense of coherence and post-migration living difficulties                                                              | 0.35 <sup>¥</sup>          | 0.19 <sup>‡</sup>            | Partially mediated |
| Post-migration living difficulties →Depression | Sense of coherence                                                                                                     | 0.23 <sup>¥</sup>          | -0.06 <sup>‡</sup>           | Partially mediated |

\* p< 0.05; <sup>‡</sup> p< 0.01; <sup>¥</sup> p< 0.001; n.s = not significant

Pre-migration and post migration living difficulties were not significantly associated with social support. Hence, social support is not a mediator for the association between exposure to trauma and symptoms in this path model (see figure-1).

Figure-1: Path model depicting direct and indirect (mediated) association between exposure to trauma and mental health outcomes.

The association between pre-migration living difficulties and depression is strengthened by exposure to post- migration living difficulties ( $\beta= 0.23, p< 0.001$ ). Pre-migration living difficulties are significantly and positively associated with emotion-oriented coping style ( $\beta= 0.09, p < 0.05$ ) as well as post-migration living difficulties ( $\beta=0.39, p < 0.001$ ). On the other hand, post-migration living difficulties are positively associated with task-oriented coping style ( $\beta=0.16, p< 0.001$ ). Depression partially mediated and strengthened the association between post-migration trauma and symptoms of PTSD ( $\beta= 0.38, p< 0.001$ ).

### Moderators

Test for moderation (interaction effect) (Table-4) illustrates that sense of coherence and task-oriented coping style do not seem to moderate the effect of pre- migration living difficulties as well as post-migration living difficulties on neither PTSD nor depression ( $p > 0.05$ ). However, the interaction between social support and post-migration living difficulties is inversely associated with depression ( $p < 0.05$ ), and hence social support seems to moderate the effect of post-migration living difficulties on depression.

Table 4: Moderation analysis for sense of coherence, task-oriented coping style and social support

| Model | Main and interaction predictors                           | Standardized path coefficient to PTSD (n=562) | Standardized path coefficient to depression(n=562) |
|-------|-----------------------------------------------------------|-----------------------------------------------|----------------------------------------------------|
| 1     | Pre-migration living difficulties                         | 0.248 <sup>¥</sup>                            | 0.440 <sup>¥</sup>                                 |
|       | pre-migration living difficulties x Sense of coherence    | 0.057                                         | 0.022                                              |
|       | Sense of coherence                                        | -0.372 <sup>¥</sup>                           | -0.513 <sup>¥</sup>                                |
| 2     | Post-migration living difficulties                        | 0.103 <sup>£</sup>                            | 0.371 <sup>¥</sup>                                 |
|       | Post-migration living difficulties x Sense of coherence   | -0.036                                        | 0.053                                              |
|       | Sense of coherence                                        | -0.407 <sup>¥</sup>                           | -0.536 <sup>¥</sup>                                |
| 3     | Pre-migration living difficulties                         | 0.353 <sup>¥</sup>                            | 0.547 <sup>¥</sup>                                 |
|       | pre-migration living difficulties x Task-oriented coping  | 0.027                                         | -0.004                                             |
|       | Task-oriented coping                                      | -0.092 <sup>*</sup>                           | -0.012                                             |
| 4     | Post-migration living difficulties                        | 0.221 <sup>¥</sup>                            | 0.466 <sup>¥</sup>                                 |
|       | Post-migration living difficulties x task-oriented coping | -0.019                                        | -0.061                                             |
|       | Task-oriented coping                                      | -0.076                                        | 0.000                                              |
| 5     | Pre-migration living difficulties                         | 0.327 <sup>¥</sup>                            | 0.536 <sup>¥</sup>                                 |
|       | pre-migration living difficulties x social support        | 0.037                                         | -0.006                                             |
|       | social support                                            | -0.249 <sup>¥</sup>                           | -0.295 <sup>¥</sup>                                |
| 6     | Post-migration living difficulties                        | 0.193 <sup>¥</sup>                            | 0.445 <sup>¥</sup>                                 |
|       | Post-migration living difficulties x social support       | -0.029                                        | -0.106 <sup>*</sup>                                |
|       | Social support                                            | -0.253 <sup>¥</sup>                           | -0.259 <sup>¥</sup>                                |

<sup>¥</sup> p < 0.001, <sup>£</sup> p<0.01, \* p < 0.05

Emotion-oriented coping style seems to have a moderating effect upon PTSD when interacting with threat for life sub-scale of pre-migration for both females ( $\beta = -0.120$ ,  $p < 0.05$ ) ( $n=304$ ) and males ( $\beta = -0.114$ ,  $p < 0.05$ ) ( $n=258$ ) (Table-5). Similarly, it is associated with reduced symptoms of PTSD and depression when interacting with threat for abuse sub-scale of pre-migration living difficulties. More specifically, the interaction between emotion-oriented coping styles with threat for abuse sub-scale of pre-migration trauma is negatively and significantly associated both with PTSD and depression (model-6). Sub-group analysis by gender (Table-5: models 7-12) demonstrated that exposure to post-migration trauma is associated with symptoms of PTSD only in females ( $p < 0.001$ ).

Table-5: The significance of path coefficients regarding main effect and interaction effect of predictors on symptoms of PTSD and depression.

| Model | Main and interaction predictors                      | Standardized path coefficient to PTSD |                    |                     | Standardized path coefficient to Depression |                    |                     |
|-------|------------------------------------------------------|---------------------------------------|--------------------|---------------------|---------------------------------------------|--------------------|---------------------|
|       |                                                      | Total (n=562)                         | Female (n=304)     | Male (n=258)        | Total (n=562)                               | Female (n=304)     | Male (n=258)        |
| 1     | Threat for life (Pre-migration)                      | 0.362 <sup>‡</sup>                    | 0.052 <sup>‡</sup> | 0.421 <sup>‡</sup>  | 0.483 <sup>‡</sup>                          | 0.720 <sup>‡</sup> | 0.484 <sup>‡</sup>  |
|       | Threat for life(pre-m) x Task-oriented coping        | 0.035                                 | 0.085              | 0.026               | 0.026                                       | 0.206              | 0.057               |
|       | Task-oriented coping                                 | -0.089*                               | -0.055             | -0.094              | 0.009                                       | 0.768              | -0.044              |
| 2     | Threat for life (Pre-migration)                      | 0.362 <sup>‡</sup>                    | 0.317 <sup>‡</sup> | 0.428 <sup>‡</sup>  | 0.492 <sup>‡</sup>                          | 0.514 <sup>‡</sup> | 0.494 <sup>‡</sup>  |
|       | Threat for life(pre-m) x Avoidance-oriented coping   | -0.069                                | -0.048             | -0.059              | -0.046                                      | -0.021             | -0.030              |
|       | Avoidance-oriented coping                            | 0.021                                 | 0.081              | -0.038              | 0.028                                       | 0.115              | -0.044              |
| 3     | Threat for life (Pre-migration)                      | 0.362 <sup>‡</sup>                    | 0.319 <sup>‡</sup> | 0.422 <sup>‡</sup>  | 0.483 <sup>‡</sup>                          | 0.514 <sup>‡</sup> | 0.484 <sup>‡</sup>  |
|       | Threat for life(pre-m) x Emotion-oriented coping     | -0.127 <sup>‡</sup>                   | -0.120*            | -0.114*             | -0.047                                      | -0.060             | -0.015              |
|       | Emotion-oriented coping                              | 0.001                                 | 0.006              | -0.020              | 0.053                                       | 0.067              | 0.021               |
| 4     | Threat for Abuse (Pre-migration)                     | 0.203 <sup>‡</sup>                    | 0.224 <sup>‡</sup> | 0.181 <sup>‡</sup>  | 0.504 <sup>‡</sup>                          | 0.538 <sup>‡</sup> | 0.461 <sup>‡</sup>  |
|       | Threat for Abuse(pre-m) x Task-oriented coping       | 0.010                                 | 0.019              | -0.002              | -0.079*                                     | -0.098             | -0.060              |
|       | Task-oriented coping                                 | -0.066                                | -0.069             | -0.064              | -0.012                                      | 0.015              | -0.038              |
| 5     | Threat for Abuse (Pre-migration)                     | 0.195 <sup>‡</sup>                    | 0.206 <sup>‡</sup> | 0.180 <sup>‡</sup>  | 0.490 <sup>‡</sup>                          | 0.530 <sup>‡</sup> | 0.450 <sup>‡</sup>  |
|       | Threat for Abuse(pre-m) x Avoidance-oriented coping  | -0.025                                | -0.006             | -0.024              | -0.005                                      | 0.030              | -0.017              |
|       | Avoidance-oriented coping                            | 0.034                                 | 0.077              | -0.002              | 0.030                                       | 0.089              | -0.014              |
| 6     | Threat for Abuse (Pre-migration)                     | 0.238 <sup>‡</sup>                    | 0.227 <sup>‡</sup> | 0.269 <sup>‡</sup>  | 0.517 <sup>‡</sup>                          | 0.543 <sup>‡</sup> | 0.495 <sup>‡</sup>  |
|       | Threat for Abuse(pre-m) x Emotion-oriented coping    | -0.180 <sup>‡</sup>                   | -0.133*            | -0.240 <sup>‡</sup> | -0.116 <sup>‡</sup>                         | -0.093             | -0.154 <sup>‡</sup> |
|       | Emotion-oriented coping                              | -0.009                                | 0.011              | -0.036              | 0.006                                       | 0.030              | -0.024              |
| 7     | Threat for life (Post-migration)                     | 0.190 <sup>‡</sup>                    | 0.293 <sup>‡</sup> | 0.078               | 0.449 <sup>‡</sup>                          | 0.502 <sup>‡</sup> | 0.400 <sup>‡</sup>  |
|       | Threat for life(post-m) x Task-oriented coping       | -0.035                                | -0.009             | -0.034              | -0.070*                                     | -0.056             | -0.090              |
|       | Task-oriented coping                                 | -0.073                                | -0.072             | -0.069              | 0.002                                       | 0.063              | -0.061              |
| 8     | Threat for life (Post-migration)                     | 0.182 <sup>‡</sup>                    | 0.281 <sup>‡</sup> | 0.067               | 0.453 <sup>‡</sup>                          | 0.522 <sup>‡</sup> | 0.382 <sup>‡</sup>  |
|       | Threat for life(post-m) x Avoidance-oriented coping  | -0.019                                | -0.013             | -0.016              | 0.029                                       | 0.045              | 0.017               |
|       | Avoidance-oriented coping                            | 0.037                                 | 0.083              | -0.002              | 0.050                                       | 0.114*             | -0.007              |
| 9     | Threat for life (Post-migration)                     | 0.182 <sup>‡</sup>                    | 0.281 <sup>‡</sup> | 0.063               | 0.452 <sup>‡</sup>                          | 0.521 <sup>‡</sup> | 0.382 <sup>‡</sup>  |
|       | Threat for life(post-m) x Emotion-oriented coping    | .0004                                 | 0.034              | -0.040              | 0.008                                       | 0.000              | 0.012               |
|       | Emotion-oriented coping                              | 0.022                                 | 0.023              | 0.020               | 0.075 <sup>a</sup>                          | 0.061              | 0.088               |
| 10    | Threat for Abuse (Post-migration)                    | 0.206 <sup>‡</sup>                    | 0.281 <sup>‡</sup> | 0.106               | 0.328 <sup>‡</sup>                          | 0.380 <sup>‡</sup> | 0.280 <sup>‡</sup>  |
|       | Threat for Abuse(post-m) x Task-oriented coping      | 0.004                                 | 0.029              | -0.034              | -0.054                                      | -0.107*            | -0.002              |
|       | Task-oriented coping                                 | -0.061                                | -0.072             | -0.061              | 0.038                                       | 0.078              | -0.006              |
| 11    | Threat for Abuse (Post-migration)                    | 0.199 <sup>‡</sup>                    | 0.276 <sup>‡</sup> | 0.093               | 0.329 <sup>‡</sup>                          | 0.387 <sup>‡</sup> | 0.273 <sup>‡</sup>  |
|       | Threat for Abuse(post-m) x Avoidance-oriented coping | 0.024                                 | 0.025              | 0.049               | 0.033                                       | 0.040              | 0.023               |
|       | Avoidance-oriented coping                            | 0.052                                 | 0.097              | 0.013               | 0.069                                       | 0.126*             | 0.014               |
| 12    | Threat for Abuse (Post-migration)                    | 0.201 <sup>‡</sup>                    | 0.272 <sup>‡</sup> | 0.111               | 0.331 <sup>‡</sup>                          | 0.384 <sup>‡</sup> | 0.278 <sup>‡</sup>  |
|       | Threat for Abuse(post-m) x Emotion-oriented coping   | -0.005                                | -0.018             | 0.003               | -0.033                                      | -0.014             | -0.052              |
|       | Emotion-oriented coping                              | 0.040                                 | 0.050              | 0.027               | 0.109*                                      | 0.111*             | 0.106*              |
| 13    | Task oriented coping                                 | -0.049                                | -0.025             | -0.072              | 0.038                                       | 0.114*             | -0.039              |
|       | Task-oriented coping x Emotion-oriented coping       | -0.025                                | 0.014              | -0.067              | -0.125 <sup>‡</sup>                         | -0.115*            | -0.148*             |
|       | Emotion-oriented coping                              | 0.033                                 | 0.043              | 0.035               | 0.098*                                      | 0.077              | 0.125*              |

<sup>‡</sup>  $p < 0.001$ , <sup>‡</sup>  $p < 0.01$ , \*  $p < 0.05$

1  
2  
3 Task-oriented coping style was independently and negatively associated with PTSD (Table 5:  
4 model-1), while emotion-oriented coping style showed positive association with depression  
5 (Table 5: models 9, 12 and 13) independently. On the contrary, the interaction between emotion-  
6 oriented and task-oriented coping styles was negatively and significantly associated with  
7 depression for females ( $\beta = -0.12$ ,  $p < 0.05$ ) and males ( $B = -0.15$ ,  $p < 0.05$ ). Emotion-oriented  
8 coping has shown inverse association with symptoms when interacting with other variables  
9 (Table 5: Model-3, 6 & 13), but it demonstrated a positive association with psychological  
10 symptoms when tested for independent prediction. Avoidance-oriented coping style was  
11 positively associated with symptoms of depression for females when tested as independent  
12 predictor (Table 5: models-8 & 11).  
13  
14  
15  
16

### 17 Discussion

18 In the present study which principally aimed at investigating mediating and moderating roles of  
19 theoretically relevant factors, specifically sense of coherence, adaptive coping style and social  
20 support between exposure to traumatic events and psychological symptoms, findings supporting  
21 our hypotheses, which we formulated based on previous studies were obtained. Sense of  
22 coherence partially mediated but not moderated the effect of exposure to pre and post traumatic  
23 events on symptoms of PTSD and depression; task-oriented coping also partially mediated but  
24 not moderated the effect of exposure to post-migration traumatic events on PTSD. However,  
25 social support moderated the effect of post-migration living difficulties on symptoms of  
26 depression, whereas emotion-oriented coping strategy moderated the effect of exposure to pre-  
27 migration trauma on symptoms of PTSD and depression.  
28  
29

30 The present finding that duration of stay in refugee camp which seems to exacerbate symptoms  
31 is consistent with previous findings in Australia,<sup>42</sup> which reported that prolonged detention and  
32 temporary protection of refugees contribute substantially to the risk of PTSD and depression as  
33 well as other mental health-related disabilities. The likely explanation for exacerbating effect of  
34 increased duration of stay for worsening symptoms of depression and PTSD in the present study  
35 is that the more refugees stay in the refugee camp, the greater chance they are exposed to post-  
36 migration stressors and traumatic abuses. Meager support, limited employment opportunities and  
37 resources and being in this situation for a prolonged period are also other stressors that could  
38 lead them to experience some form of psychological symptoms.  
39

40 An increase in the magnitude of emotion-oriented and task-oriented coping styles with  
41 increased exposure to pre-migration and post-migration living difficulties respectively, is in  
42 line with previous findings of Tibetan refugees in India.<sup>5</sup> The indirect (mediated) effect of pre-  
43 migration living difficulties on depression and PTSD via the path of post-migration living  
44 difficulties has theoretical support in the literature.<sup>1,17</sup> The association between pre-migration  
45 living difficulties and PTSD was mediated by post-migration living difficulties among  
46 Zimbabwean refugees in South Africa.<sup>1</sup> A recent study has also reported that post-migration  
47 stressors have accounted for greater variance in levels of depression and anxiety compared to  
48 experiences of trauma and loss,<sup>17</sup> which implies that being exposed to pre-migration alone is not  
49 a sole factor accountable for current status of refugees mental wellbeing, and hence post-  
50 migration stressors likely play an intervening (mediating) role. The mediating role of post-  
51 migration living difficulties in the present study can be best explained by continues exposure of  
52  
53  
54  
55  
56  
57  
58  
59  
60



1  
2  
3 Eritrean refugees to stressful conditions of the camp life in Ethiopia, like poverty and economic  
4 dependency, limited employment opportunity, poor and overcrowded housing, which likely  
5 worsen the effect of exposure to traumatic events, which Eritreans had confronted in their home  
6 country before migration.  
7  
8

9 The association between sense of coherence and reduced symptoms of PTSD and depression in  
10 this study is in line with the literature that describes inverse association between sense of  
11 coherence and psychological distress in many cultural contexts.<sup>3, 14-15,37</sup> On the other hand, sense  
12 of coherence seems to mediate the association between traumatic events and psychological  
13 symptoms in this study which is again in agreement with previous findings.<sup>3-4</sup> However, its  
14 moderating role between exposure to trauma and psychological symptoms reported in other  
15 studies<sup>7</sup> was not found in this study.  
16  
17

18 The moderating role of social support in this study is in line with evidences of previous studies.<sup>10</sup>  
19 However, unlike the recent study which indicated perceived social support to have a moderating  
20 effect of exposure to trauma on symptoms of PTSD among Eritrean and Sudanese asylum  
21 seekers in Israel,<sup>10</sup> the current findings showed that social support has moderated the effect of  
22 exposure to post-migration trauma on symptoms of depression. The absence of mediating role of  
23 social support between exposure to trauma and symptoms of PTSD and depression is in  
24 agreement with findings of a study conducted in African Americans aged between 18 and 54  
25 from the National Co-morbidity Study, which reported that social support did not mediate the  
26 effects of financial strain or traumatic events on psychological symptoms.<sup>43</sup>  
27  
28

29 Task-oriented coping style seems to have mediated the relationship between exposure to post-  
30 migration trauma and symptoms of PTSD in this study, which signifies the importance of this  
31 coping strategy for Eritrean refugees. This finding is also consistent with findings in Tibetan  
32 refugees in India.<sup>5</sup> However, task-oriented coping style didn't have a moderating effect of  
33 exposure to trauma on psychological health indicated in previous studies, including the  
34 findings from displaced Ethiopians from Eritrea who were living in temporary shelters in  
35 Ethiopia.<sup>18</sup> On the other hand, avoidance-oriented coping style was not found beneficial in this  
36 study unlike what was reported in previous studies from Ethiopian<sup>18</sup> and Congolese sample,<sup>8</sup>  
37 where avoidance-coping strategy was found beneficial. The likely explanation for this is the  
38 composition of refugee participants where most of them were literate, having urban-orientation,  
39 and relatively assertive culture of Eritreans.  
40  
41

42 Our finding regarding the association between depression and PTSD supported what was  
43 reported in the Zimbabwean sample.<sup>1</sup> However, since our finding was based on a cross-sectional  
44 survey, it is noteworthy to think the possibility that elevated symptoms of depression might have  
45 been driven by heightened symptoms of PTSD for reasons of reverse causality, and hence  
46 caution should be taken in the interpretation of this finding. The inverse association between the  
47 interaction variable (i.e. emotion-oriented coping style and task-oriented coping style) and  
48 symptoms of depression for both sexes has supported one of our hypotheses, and this finding is  
49 in line with the report from the Democratic Republic of Congo.<sup>8</sup> Our findings that PTSD  
50 symptoms are differentially associated with post-migration trauma in females, not in males,  
51 implies the ongoing gender-based vulnerability of female refugees to post migration abuses in  
52 the refugee camps, which are also reported in previous studies conducted in refugee camps in  
53 Ethiopia.<sup>44-45</sup> Specifically, gender based physical violence was documented in previous study  
54 from Eritrean sample living in Shimelba, one of the biggest refugee camps for Eritreans in  
55  
56  
57



Northern Ethiopia.<sup>44</sup> Another study from among Somali female refugees reported that they were vulnerable to rape during transit and abduction in the refugee camp in South Eastern Ethiopia.<sup>45</sup> The pre/post-migration living difficulties should be understood with caution in the context of the present study with Eritrean refugees who traveled short distance to cross the border to a neighboring country (Ethiopia), characterized by a relatively similar culture. The essence of pre/post migration living difficulties described in the literature may denote something different for refugees who had traveled long distances and those who had entirely different culture in comparison with the culture of the host country.

The association between emotion-oriented coping style and reduced symptoms of PTSD, when it interacts with threat for life sub-scale of pre-migration difficulties may imply that this coping style has potential benefit for those persons who encountered life threatening trauma. This coping strategy may be helpful for release of long held traumatic memories, thereby reducing their PTSD symptoms. The moderating effect of emotion-oriented coping strategy for pre-migration abuse (sexual and physical) in reducing symptoms (PTSD and depression) implies its potential use for refugees who had experienced abuse in Eritrea to deal with symptoms of both conditions. The protective role of this coping style was also reported by previous studies in other African humanitarian settings.<sup>8,18</sup>

### **Implications of the findings**

The differential association between PTSD symptoms and post-migration living difficulties for females, unlike males, may necessitate on the pressing need of intervention on ongoing post-migration traumatic abuses uniquely for female refugees. This finding also informs national and international policy makers for special protection of women refugees from violation of their rights which is so rampant in a male dominated society such as Eastern Africa.

The finding that duration of stay in camp which seems to mediate the effect of pre-migration trauma on PTSD calls for accelerated integration of refugees with the host society. Enhancement of social support for the refugees also seems to be crucial, because this study has shown that it has a fairly strong positive association with increased sense of coherence, which in turn is associated with decreasing symptoms of PTD and depression; it has also moderated the effect of post-migration living difficulties on depression. Future studies should focus on prospective cohort as well as longitudinal study designs to replicate the present findings from Eritrean samples in humanitarian settings.

**Acknowledgments:** Our appreciation primarily goes to a senior Ethiopian mental health researcher, Dr Teshome Shibre kerkilie, who is presently living in Canada, for his invaluable support in revising the research protocol and his inspiring encouragements from the inception of this study till its completion. We would also like to thank head office of ARRA in Addis Ababa, and its district office in Shire in Ethiopia for permission to conduct this study. Furthermore, we would like to acknowledge the worthwhile contribution made by healthcare staff of ARRA and center for victims of Trauma (CVT) in Shire and Mai Aini refugee camp for their unreserved support during the entire period of data collection, and all the participants of the study who shared their experiences without reservation.

**Funding:** This study was financially supported by Addis Ababa University and University of Gondar, Ethiopia

**Data availability and sharing:** All necessary data to understand in manuscript (MS) is included in tables or text within the MS. The row data in SPSS format will be deposited in the Department of Psychiatry, Addis Ababa University (AAU), and can be accessed in accordance with data sharing policy of Institutional Review Board (IRB) of College of Health Sciences, AAU.

**Authors' contributions:** BG is the Principal Investigator (PI) of this study. He led in generating the research idea, design and methods of the study, writing the research protocol, validating measures, data collection, analysis, interpretation and writing of the findings. AA has made contribution in revising the research protocol, the research design, validation of measures, analysis

and interpretation of data, and critically reviewing the final manuscript. GM made contribution in checking and editing the statistical analysis, critically reviewing of the drafted manuscript, and approved the final version.

**Ethical Considerations:** This study had ethical clearance from Institutional Ethical Review Board (IRB) of College of Health Sciences, Addis Ababa University. Participants were provided with information sheet about the study regarding its objective, relevance, beneficence, risk, participant's rights and others. Then a written consent from each participant was obtained before engaging them to participate. Ethical issues as outlined by declaration of Helsinki for human participants in medical research were adhered.

**Competing interests:** Authors declare that there is no conflict of interest.

## References

1. Idemudia ES, Williams JK, Wyatt G. Gender difference in Trauma and Post traumatic Stress Symptoms among Displaced Zimbabweans in South Africa. *J Trauma Stress Disorder Treat* 2013; 2(3): 1340.
2. Brumsey AD, Joseph NT, Myers HF, et al. Modeling the Relationship between Trauma and Psychological Distress among HIV-Positive and HIV-Negative Women. *Psychol Trauma*, 2013; 5(1): 69–76.
3. Nosheen,A, Riaz,MN, Batoor,N. Cross-Cultural Study on Social Support, Sense of Coherence and Outcomes in Pakistan and Germany. *Pakistan Journal of Commerce and Social Sciences* 2014; 8 (2):445- 452.
4. Veronese G, Pepe A. Sense of coherence mediates the effect of trauma on the social and emotional functioning of Palestinian health providers. *American Journal of Orthopsychiatry* 2014; 84(5): 597-606.
5. Sachs B, Rosenfeld B, Lhewa,D, et al. Entering Exile: Trauma, Mental Health, and Coping Among Tibetan Refugees Arriving in Dharamsala, India. *Journal of Traumatic Stress* 2008; 21(2): 199–208.
6. Antonovsky, A. Unravelling the Mystery of Health. How People Manage Stress and Stay Well. Jossey-Bass, 1987, San Francisco.
7. Pham PN, Vinck P, kinkodi DK, et al. Sense of coherence and its Association with Exposure to traumatic events, post traumatic stress disorder, and depression in Eastern Democratic Republic of Congo. *Journal of Traumatic Stress* 2010; 23(3):313–321.
8. Cherewick M, Tol W, Burnham G, Doocy S, et al. A structural equation model of conflict-affected youth coping and resilience. *Health Psychology and Behavioral Medicine* 2016; 4(1): 155–174.
9. Dalgard OS, Dowrick C, Lehtinen V, et al. Negative life events, social support and gender difference in depression: A multinational community survey with data from the ODIN study. *Soc Psychiatry Psychiatr Epidemiol* 2006; 41: 444-451.
10. Nakasha O, Nagara M, Shoshania A, et al. The association between perceived social support and post traumatic stress symptoms among Eritrean and Sudanese male asylum seekers in Israel. *International Journal of Culture and Mental Health* 2017;doi - 10.1080/17542863.2017.1299190.
11. Lazarus, R. S., & Folkman, S. Psychological Stress and the Coping Process. New York, 1984; Appleton-Century-Crofts.
12. Voges MA. and Romney DM. Risk and Resiliency Factors in Post Traumatic Stress Disorder, *Annals of General Hospital Psychiatry* 2003; 2:4, <https://doi.org/10.1186/1475-2832-2-4>.
13. HoobermanJ, Rosenfeld B, Rasmussen A, et al. Resilience in Trauma-Exposed Refugees: The Moderating Effect of Coping Style on Resilience Variables. *American Journal of Orthopsychiatry* 2010; 80 (4):557–563.
14. Almedom A, Tesfamichael B, Mohammed ZS, et al. Use of 'sense of coherence (soc) scale to measure resilience in Eritrea: Interrogating both the data and the scale. *J.biosoc.Sci* 2007; 39: 91–107.
15. Aljurany H. Personality characteristics, trauma and symptoms of PTSD: A population based study in Iraq. *PhD dissertation*2013; Heriot Watt University.
16. Li M. The Relationship among Sense of Coherence, Coping Strategies, and Interpersonal Patterns: A Cross-Cultural Study, *American Counseling Association, VISTAS* online 2015; 63:1-10.
17. Miller KE, Rasmusse A. The mental health of civilians displaced by armed conflict: an ecological model of refugee distress. *Epidemiology and Psychiatric Sciences* 2016; doi:10.1017/S2045796016000172
18. Araya M,Chotai J, KomproeJ.H, de Jong JTV. Gender differences in traumatic life events, coping strategies, perceived social support and socio-demographics among post-conflict displaced persons in Ethiopia. *Social psychiatry Psychiatric epidemiol* 2007; 42: 307-315.

19. Women's Refugee Commission). Young and Astray, An Assessment of Driving the Movement of An Accompanied Children and Adolescents from Eritrea into Ethiopia, Sudan and Beyond. 2013; New York.
20. United Nations Higher Commissioner for Refugees. Ethiopia, Operational Overview: Camp Demographic Population statistics by Office and Region (As of 31 August 2013).  
<https://reliefweb.int/sites/reliefweb.int/files/resources/Auguststatisticspackage.pdf>
21. United Nations Higher Commissioner for Refugees. Mai Aini refugee camp. Camp profile Shire as of 31<sup>st</sup> January, 2018. UNHCR, Ethiopia, <https://data2.unhcr.org/ar/documents/download/62694>
22. de Jong JT, Komproe IH, Van Ommeren M, et al: Lifetime Events and Posttraumatic Stress Disorder in 4 Post-conflict Settings, *Journal of American Medical Association*, 2007; 266(5):255-262.
23. Onyut LP, Patience L, Neuner F, et al. The Nakivale Camp Mental Health Project: Building Local Competency for Psychological assistance to Traumatized Refugees, *Intervention* 2004; 2(2): 90-107.
24. Kamau M, Silove D, Steel Z, Catanzaro R, et al. Psychiatric Disorders in an African Refugee Camp. *Intervention* 2004; 2(2):84–89
25. Ommern MV and de Jong JTV. Preparing instruments for cross-cultural research. Use of the translation monitoring form with Nepali speaking Bhutanese refugees, *Trans-cultural psychiatry* 1999; 36(3):285-301.
26. Lynn MR. Determination and Quantification Of Content Validity. *Nursing Research* 1986; 35(6): 382–386.
27. Polit DF and Beck CT. The Content Validity Index: Are you sure you know what's being reported? Critique and recommendations. *Research in Nursing & Health*, 2006; 29: 489–497.
28. Idemudia ES, Williams JK, Madu SN, et al. Trauma Exposures and Post traumatic Stress among Zimbabwean refugees in South Africa. *Life Science Journal* 2013; 10 (3): 2397-2497.
29. Radloff, LS. The CES-D Scale: A Self-Report Depression Scale for Research in the General Population. *Applied Psychological measurement* 1977; 1(3): 385-401.
30. Moges MF. Translation And Adaptation Of The Center For Epidemiologic Studies-Depression (CES-D) Scale into Tigrigna Language For Tigrigna Speaking Eritrean Immigrants in the United States (Phd Thesis), University of South Florida, *ProQuest Dissertations Publishing* 2011; 3464689.
31. Prins A, Ouimette C, Kimerling R, et al. The primary care PTSD screen (PC-PTSD): development and operating characteristics. *Primary Care Psychiatry* 2003; 9(1): 9-14.
32. Bileuse PD, Wright KM, Adler AB, et al. Validating the Primary Care Post Traumatic Stress Disorder screen and the Post traumatic Stress Disorder Checklist with soldiers returning from combat. *Journal of Consulting and Clinical Psychology* 2008; 76(2):272–281.
33. Hoge CW, Auchterlonie JL, Milliken CS. Mental health problems, use of mental health services, and attrition from military service after returning from deployment to Iraq or Afghanistan. *Journal of the American Medical Association* 2006; 295:1023-1032.
34. Taylor EM, Yanni EA, Pezzi C, et al. Physical and Mental Health Status of Iraqi Refugees Resettled in the United States. *J Immigr Minor Health* 2014; 16(6): 1130–1137.
35. Caitlin M. Somali Refugee Interpretations of trauma-related Mental Illness: Similarities and Differences between the Somali concepts of 'MurugoJoogto' and 'Qulub' and PTSD, *Undergraduate Research Journal at the University of Northern Colorado* 2013;3:1.
36. Araya M. Post-conflict internally displaced persons in Ethiopia: Mental Distress and Quality of life in relation to Traumatic Life events, Coping Strategy, Social support, and Living Conditions, *PhD Dissertation*, Printed by Print & Media, Umea University 2007; Umeå, 2003889.
37. Antonovsky A. The structure and properties of sense of coherence scale. *Social Science & Medicine* 1994; 36(6): 725-733.
38. Mohammadzadeh A, Poursharifi H, Alipour, A. Validation of Sense of Coherence (SOC) 13-item scale in Iranian sample. *Procedia Social and Behavioral Sciences* 2010; 5(2010): 1451–1455.
39. Eriksson M, Lindstro B. Validity of Antonovsky's sense of coherence scale: a systematic review. *J Epidemiol Community Health* 2005; 59: 460–466.
40. Abiola T, Udofia O, Zakari M. Psychometric properties of the 3-Item Oslo Social Support Scale among Clinical Students of Bayero University, Kano, Nigeria; *Malaysian Journal of Psychiatry* 2013; 22:2.
41. Schreiber JB, Nora A, Stage FK, Barlow EA, King J. Reporting Structural Equation Modeling and Confirmatory Factor Analysis Results: A Review. *The Journal of Educational Research* 2006; 99(6):323-337.
42. Steel Z, Silove D, Brooks R, et al. Impact of immigration detention and temporary protection on the mental health of refugees. *British Journal of Psychiatry* 2005; 188(1): 58-64.
43. Lincoln, Chatters, Taylor. Social Support, Traumatic Events, and Depressive Symptoms among African Americans. *J Marriage Fam.* 2005; 67(3): 754–766.

- 1  
2  
3 44. Feseha G, G/mariam A and Gerbaba M. Intimate Partner Physical Violence among Women in Shimelba  
4 Refugee Camp, Northern Ethiopia, *BMC Public Health* 2012; 12(125):1-10.  
5 45. Wirtz, AL, Glass N, Pham K, Aberra A, Rubenstein LS, Singh S, et al. Development of a screening tool to  
6 identify female survivors of gender-based violence in a humanitarian setting: Qualitative evidence from  
7 research among refugees in Ethiopia. *Conflict and Health* 2013; 7:13,doi: 10.1186/1752-1505-7-13.  
8  
9  
10  
11  
12  
13  
14  
15  
16  
17  
18  
19  
20  
21  
22  
23  
24  
25  
26  
27  
28  
29  
30  
31  
32  
33  
34  
35  
36  
37  
38  
39  
40  
41  
42  
43  
44  
45  
46  
47  
48  
49  
50  
51  
52  
53  
54  
55  
56  
57  
58  
59  
60

For peer review only

1  
2  
3  
4  
5  
6  
7  
8  
9  
10  
11  
12  
13  
14  
15  
16  
17  
18  
19  
20  
21  
22  
23  
24  
25  
26  
27  
28  
29  
30  
31  
32  
33  
34  
35  
36  
37  
38  
39  
40  
41  
42  
43  
44  
45  
46  
47  
48  
49  
50  
51  
52  
53  
54  
55  
56  
57  
58  
59  
60

Figure-1: Path model depicting direct and indirect (mediated) association between exposure to trauma and mental health outcomes.

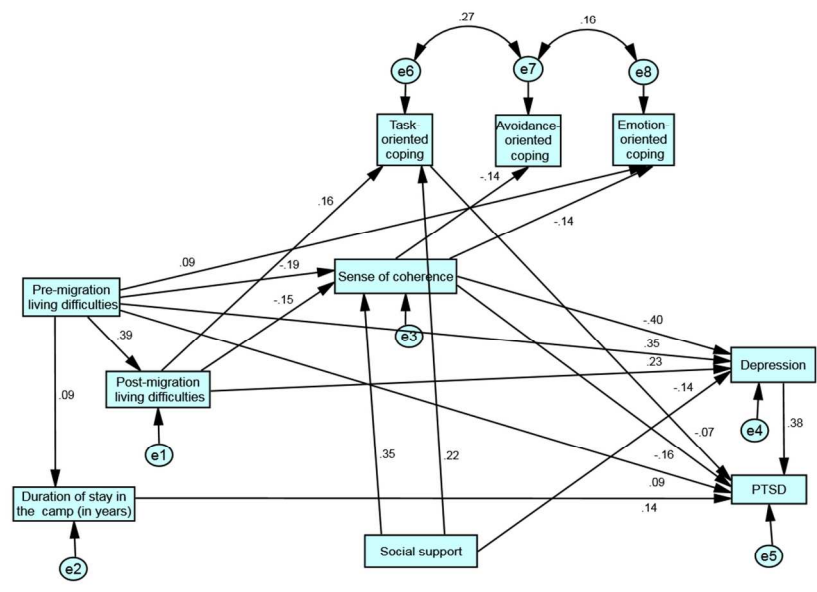

**Legend:** All paths are depicting standardized significant coefficients. Rectangles represent observed variables, circles represent disturbance (error) terms; one sided arrows together with coefficient values are equivalent to regression beta weights between the two variables; double headed arrows represent co-variances between error terms.

279x238mm (300 x 300 DPI)

Only

# BMJ Open

## Symptoms of Post Traumatic Stress Disorder and Depression among Eritrean refugees in Ethiopia: Identifying Direct, Mediating and Moderating Predictors from Path Analysis

|                                  |                                                                                                                                                                                                                                  |
|----------------------------------|----------------------------------------------------------------------------------------------------------------------------------------------------------------------------------------------------------------------------------|
| Journal:                         | <i>BMJ Open</i>                                                                                                                                                                                                                  |
| Manuscript ID                    | bmjopen-2017-021142.R2                                                                                                                                                                                                           |
| Article Type:                    | Research                                                                                                                                                                                                                         |
| Date Submitted by the Author:    | 20-Nov-2018                                                                                                                                                                                                                      |
| Complete List of Authors:        | Getnet, Berhanie; Addis Ababa University School of Medicine, Psychiatry<br>Medhin, Girmay; Addis Ababa University, Aklilu Lemma Institute of Pathobiology<br>Alem, Atalay; Addis Ababa University School of Medicine, Psychiatry |
| <b>Primary Subject Heading</b> : | Mental health                                                                                                                                                                                                                    |
| Secondary Subject Heading:       | Epidemiology                                                                                                                                                                                                                     |
| Keywords:                        | Mediation, Moderation, Post Traumatic Stress Disorder, Depression, Eritrean refugees                                                                                                                                             |
|                                  |                                                                                                                                                                                                                                  |

SCHOLARONE™  
Manuscripts



1  
2  
3 **Symptoms of Post Traumatic Stress Disorder and Depression among Eritrean refugees in**  
4  
5 **Ethiopia: Identifying Direct, Meditating and Moderating Predictors from Path Analysis**  
6  
7  
8  
9

10 Berhanie Getnet,<sup>1,2\*</sup> M.A., Girmay Medhin,<sup>3</sup>M.Sc., Ph.D., Atalay Alem,<sup>1</sup> M.D., Ph.D  
11  
12  
13

14 **Corresponding Author:** Berhanie Getnet, PhD candidate in Mental Health Epidemiology, College of Health Sciences,  
15 Department of Psychiatry, Addis Ababa University; Addis Ababa, Ethiopia; lecturer, University of Gondar, Department of  
16 Psychology, Gondar, Ethiopia; email address: berhanie.getnet.bg@gmail.com ; Cell phone: +251911336295  
17  
18  
19  
20

21 <sup>1</sup> Addis Ababa University, College of Health Sciences, Department of Psychiatry, Addis Ababa, Ethiopia  
22

23 <sup>2</sup>University of Gondar, Department of Psychology, P.O.Box: 196, Gondar, Ethiopia  
24

25 <sup>3</sup>Addis Ababa University, Aklilu Lemma Institute of Pathobiology, Addis Ababa, Ethiopia  
26  
27  
28  
29  
30  
31  
32  
33  
34  
35  
36  
37  
38  
39  
40  
41  
42  
43  
44  
45  
46  
47  
48  
49  
50  
51  
52  
53  
54  
55  
56  
57  
58  
59  
60

## Abstract

**Objective:** This study aimed at testing the significance of mediating and moderating roles of sense of coherence, adaptive coping styles and social support in the relationship between exposure to trauma and psychological symptoms in a refugee population in sub-Saharan Africa.

**Methods:** A cross-sectional survey design was employed to collect data. The study was carried out in Mai Aini refugee camp in Ethiopia. A total of 562 adult Eritrean refugees aged 18-74 years were selected randomly to screen for depression and post-traumatic stress disorder (PTSD) symptoms and to examine associated factors. Data were collected using the pre- and post-migration living difficulties checklist, Center for Epidemiologic Studies Depression Scale (CES-D), Primary Care PTSD Screener (PC-PTSD), coping style scale, Sense of Coherence scale (SoC-13), and Oslo Social Support scale (OSS-3). Path modeling was used to test the mediation and moderation effects of pre-specified factors.

**Results:** Pre-migration living difficulties were associated directly with symptoms of PTSD ( $\beta=0.09$ ,  $p < 0.05$ ), and associated indirectly with PTSD symptoms in paths through duration of stay in the camp, sense of coherence, post-migration living difficulties, task-oriented coping style and depressive symptoms ( $\beta = 0.26$ ,  $p < 0.01$ ). Pre- and post-migration living difficulties were associated directly with depressive symptoms with standardized estimate of  $\beta=0.35$  ( $p < 0.001$ ) and  $\beta=0.23$  ( $p < 0.05$ ), respectively. Post-migration living difficulties were associated indirectly with PTSD through paths of sense of coherence, task-oriented coping style and depressive symptoms ( $\beta=0.13$ ;  $p < 0.01$ ). Social support moderated the effect of post-migration living difficulties on depressive symptoms ( $p < 0.05$ ). Emotion-oriented coping style moderated the

1  
2  
3 effect of pre-migration threat for abuse on PTSD ( $\beta = -0.18$ ,  $p < 0.001$ ) and depressive ( $\beta = -0.12$ ,  
4  $p < 0.01$ ) symptoms, as well as moderating threat to life on PTSD symptoms ( $\beta = -0.13$ ,  $p < 0.001$ ).  
5  
6

7 **Conclusions:** Sense of coherence and task-oriented coping style showed a partial mediating  
8 effect on the association between exposure to trauma and symptoms of depression and PTSD. An  
9 emotion-oriented coping style and social support moderated the effect of pre and post-migration  
10 living difficulties, respectively. Fostering social support, task-oriented and emotion-oriented  
11 coping styles may be beneficial for these refugees.  
12  
13  
14  
15  
16  
17  
18  
19  
20

21 **Key words:** Mediation, moderation, PTSD, depression, Eritrean refugees, Ethiopia  
22  
23  
24  
25

### 26 **Strengths and Limitations of this Study**

- 27  
28 ■ The use of path modeling to examine multiple moderating and mediating factors on the  
29 effect of exposure to outcome variables is strength of this study.  
30  
31
- 32  
33 ■ Rigorous adaptation of tools to the local context increased validity of the findings.  
34  
35
- 36  
37 ■ The inherent nature of cross-sectional design employed in the current study means that a  
38 cause-effect relationship cannot be inferred.  
39  
40
- 41  
42 ■ It is possible that study participants had reservations about reporting violations of rights  
43 and other adverse experiences in Ethiopia for fear of negative consequences.  
44  
45  
46

### 47 **Background**

48  
49 In contemporary mental health research in humanitarian settings it is important to consider the  
50 effects of traumatic events on the mental wellbeing of survivors. There is also increasing interest  
51 to investigate mediators of the effects of trauma on mental health, including the role of  
52  
53  
54  
55  
56  
57  
58  
59  
60

1  
2  
3 precipitating risk factors such as exposure to post migration trauma,<sup>1</sup> maladaptive coping  
4 methods,<sup>2</sup> and protective factors, such as a sense of coherence<sup>3-4</sup> and adaptive coping strategies.<sup>5</sup>  
5  
6  
7  
8  
9

10  
11 Antonovsky(1987, p.19) defined sense of coherence as: “a global orientation that expresses the  
12 extent to which one has a pervasive, enduring though dynamic feelings of confidence that (1) the  
13 stimuli deriving from one’s internal and external environments in the course of living are  
14 structured and predictable and explicable;(2) the resources are available to meet the demands  
15 posed by the stimuli; and (3) these demands are challenges worthy of investment and  
16 engagement”.<sup>6</sup> Sense of coherence<sup>7</sup> and emotion-oriented coping strategies<sup>8</sup> have been reported  
17 to moderate the effect of traumatic events. Social support is reported to be inversely associated  
18 with depression.<sup>9</sup> Similarly, social support has also been reported to have a moderating effect  
19 when there has been exposure to trauma on the symptoms of PTSD among Eritrean and  
20 Sudanese asylum seekers in Israel.<sup>10</sup>  
21  
22  
23  
24  
25  
26  
27  
28  
29  
30  
31  
32  
33  
34

35 In a study of Tibetan refugees in India, subsequent development of depressive or PTSD  
36 symptoms was mediated by use of coping strategies.<sup>5</sup> Coping in this regard refers to the  
37 psychological process with which individuals respond to stressors and life hassles, which acts as  
38 a mediator between stress and psychological wellbeing.<sup>11</sup> In another study where the use of  
39 different coping strategies was compared between people with PTSD and a control group, it was  
40 found that those with PTSD were more likely to use an emotion-oriented coping style in dealing  
41 with stressful events compared to those without PTSD.<sup>12</sup> The kind of coping style could  
42 moderate (strengthen or weaken) the association between other resilience variables and PTSD  
43 symptoms.<sup>13</sup> In the same study, an engagement coping style was hypothesized to strengthen the  
44  
45  
46  
47  
48  
49  
50  
51  
52  
53  
54  
55  
56  
57  
58  
59  
60

1  
2  
3 above associations, while a disengagement coping style weakened them.<sup>13</sup> A similar study from  
4 the Democratic Republic of Congo indicated that the interaction between emotion-oriented  
5 coping strategies and problem-oriented coping strategies (coping flexibility) was associated with  
6 lower psychological distress.<sup>8</sup>  
7  
8  
9  
10  
11

12  
13  
14 In population-based studies conducted in Eritrea and Iraq, sense of coherence was found to be  
15 negatively associated with PTSD symptoms<sup>14</sup> and exposure to trauma.<sup>15</sup> In cross-cultural studies  
16 aimed at determining the relationship between sense of coherence and coping strategies in  
17 Chinese and United States study participants, sense of coherence was found to be a predictor of  
18 problem solving and avoidance coping strategies.<sup>16</sup> In another study from Pakistan and Germany,  
19 sense of coherence played a mediating role between social support and stress.<sup>3</sup> In a study of  
20 Palestinian emergency health workers, sense of coherence was shown to be a partial mediator on  
21 the impact of trauma for both anxiety and social dysfunction.<sup>4</sup>  
22  
23  
24  
25  
26  
27  
28  
29  
30  
31  
32

33  
34  
35 In a Structural Equation Modeling (SEM) study conducted among Zimbabwean refugees in  
36 South Africa, post-migration living difficulties mediated the association between pre-migration  
37 living difficulties and PTSD.<sup>1</sup> Similarly, in a recent study that focused on the importance of post-  
38 migration stressors in an ecological model of refugees' mental health, post-migration stressors  
39 were found to consistently predict levels of distress as powerfully as exposure to pre-migration  
40 trauma such as exposure to violence.<sup>17</sup> In a study in Ethiopia among internally displaced persons,  
41 some sub-scales of coping interacted with displacement-related traumatic events leading to a  
42 significant association with mental distress.<sup>18</sup>  
43  
44  
45  
46  
47  
48  
49  
50  
51  
52  
53  
54  
55  
56  
57  
58  
59  
60

1  
2  
3 Continuous migration of Eritrean youth to refugee camps of Ethiopia is occurring in large  
4 numbers for a variety of reasons including: limited employment opportunities and economic  
5 need, desire for family reunification, social pressure, and perceived threat of conscription.<sup>19</sup> As  
6  
7  
8 of 2013, there were 53,035 refugees in four camps (namely Mai Aini, Shimelba, Adi harush and  
9 Hitsats).<sup>20</sup> Of these, 37,562 (70.8%) were males. Mai Aini, where this study was conducted, is  
10 the second largest camp, where 17,825 refugees resided at the time of the study. Of these,  
11  
12 11,892(66.7%) were males.<sup>20</sup> The majority were students, and most of them were unemployed  
13 before coming to Ethiopia.<sup>20</sup>A recent update by the United Nations High Commissioner for  
14  
15  
16  
17  
18  
19  
20  
21  
22  
23  
24  
25  
26  
27  
28  
29  
30  
31  
32  
33  
34  
35  
36  
37  
38  
39  
40  
41  
42  
43  
44  
45  
46  
47  
48  
49  
50  
51  
52  
53  
54  
55  
56  
57  
58  
59  
60

Refugees (UNHCR) indicated that about 11,718 Eritrean refugees were living in Mai Aini camp, of which 4,826(41%) were female.<sup>21</sup>

Although there are reports on mediating and moderating roles of sense of coherence, coping styles, and social support in the relationship between exposure to trauma and psychological symptoms in humanitarian settings, to our knowledge there are no such studies in Eritrean refugees living in Ethiopia. Specifically, we wanted to investigate whether: (a) a sense of coherence and task-oriented coping together mediated the relationship between exposure to pre and post-migration living difficulties and psychological symptoms (PTSD and depression); (b) social support moderated the effect of exposure to traumatic events on symptoms of PTSD and depression; (c) the interaction between emotion-orientated and task-oriented coping styles would be associated with reduced symptoms of PTSD and depression.

## Materials and Methods

**Study setting:** As stated earlier, this study was conducted at Mai-Aini refugee camp, 1116 km North of Addis Ababa, the capital city of Ethiopia. Mai-Ani is one of the refugee camps hosting



1  
2  
3 Eritreans which was established in 2008 through the support given to the Ethiopian Government  
4  
5 by the UNHCR.<sup>19</sup>  
6  
7

## 8 **Study design**

9  
10 Data for this report were collected using a cross-sectional study design.  
11  
12

## 13 **Sample size estimation**

14  
15 Sample size determination was carried out considering the average prevalence of PTSD to be  
16  
17 30.7% among refugees in East African camps<sup>22-24</sup> with 4% precision and a 95% confidence  
18  
19 interval. Adding 10% for the likely non-response, and using a single population proportion  
20  
21 formula, the required sample size was 562.  
22  
23

## 24 **Sampling**

25  
26 According to a population census document from the Administration of Refugees and Returnees  
27  
28 Affairs (ARRA) and UNCHR, there were a total of 10,006 registered refugees living in the camp  
29  
30 in December 2015, of whom 5,749 were males. However, there was incomplete information  
31  
32 about refugees' addresses, especially for the newly arrived. Thus, we allocated a house number  
33  
34 to each household and conducted a household census from December 2015 to January, 2016. The  
35  
36 census showed that a total of 2055 households were registered in the camp, out of which 100  
37  
38 households were excluded because household members were minors (children below the age of  
39  
40 18). The remaining 1955 households were taken as a sampling frame. From this sampling frame,  
41  
42 562 households were selected using the simple random sampling method and one participant was  
43  
44 interviewed by a trained data collector from each household. In a household where there were  
45  
46 more than one eligible persons (18 years old and above and having Eritrean nationality before  
47  
48 migrating to Ethiopia), one participant was selected using the lottery method. Twenty-two of the  
49  
50 selected households were replaced because household members were not found after three visits  
51  
52  
53  
54  
55  
56  
57  
58  
59  
60

1  
2  
3 by data collectors. The replacement was done using neighboring households (i.e. from those that  
4 preceded or followed the selected households' numbers). Data collection took place from  
5  
6 January to March 2016. As the principal investigator (BG) was supervising and monitoring the  
7  
8 data collection on daily basis, incomplete data were collected by sending the data collectors back  
9  
10 to the respondents' homes.  
11  
12  
13

### 14 **Variables**

15  
16 Symptoms of PTSD and depression were the main outcome variables in this study. Pre and post-  
17 migration living difficulties were the exposures and main predictor variables. Sense of  
18 coherence, task-oriented coping, emotion-oriented, avoidance-oriented coping styles and social  
19 support were assumed to moderate the effect of exposure to traumatic events on symptoms of  
20 depression and PTSD. Variables such as gender, age, and marital status, level of education,  
21 frequency of prayer and duration of stay in the refugee camp were regarded as potential  
22 confounders.  
23  
24  
25  
26  
27  
28  
29  
30  
31  
32

### 33 **Instrument adaptation**

34  
35 All instruments used in this study were adapted following standard adaptation procedures for  
36 trans-cultural study.<sup>25</sup> Except for the Center for Epidemiologic Studies Depression (CES-D)  
37 Scale, all instruments were translated from the source language (English) into the target language  
38 (Tigrigna) by two bilingual experts, followed by masked back translated into English by two  
39 other independent bilingual translators. The translations and the back translations were given to  
40 an expert panel whose mother tongue was Tigrigna, the language used for the study. Taking  
41 comments from the experts as an input, consensus meetings were held to merge the two  
42 translated versions by the translators. The translations were then rated using a 4-point rating  
43 scale for their content relevance by seven experts to obtain a content validity index.<sup>26-27</sup>  
44  
45  
46  
47  
48  
49  
50  
51  
52  
53  
54  
55  
56  
57  
58  
59  
60

1  
2  
3 Following that, cognitive interviews were conducted with six refugees not included in the study  
4  
5 to ensure the understandability, as well acceptability, of items for the target Eritrean refugee  
6  
7 community. Minor revisions were made based on their feedback. All instruments were pilot  
8  
9 tested before they were employed in the main study.  
10  
11  
12  
13

### 14 **Patient and public involvement**

15  
16 Since this study involved members of vulnerable population, who were at risk of violation of  
17  
18 their rights and susceptible to various health problems including mental health problems, the  
19  
20 necessary precautions were taken when recruiting participants for the study. The research  
21  
22 question and adaptation of outcome measures were informed by literature review. The  
23  
24 preferences and experiences of refugees were understood based on a situational analysis study  
25  
26 (unpublished data) carried out in the same community one year prior to the current study (B.  
27  
28 Getnet, personal communication, May 14, 2015). The situational analysis study involved  
29  
30 interviews with key informants amongst the refugees and Focus Group Discussion (FGD) with  
31  
32 refugee counselors and Eritrean lay counselors trained in psychosocial interventions. The  
33  
34 participants were assured about legal protection for their security. Permission letters were also  
35  
36 obtained from concerned higher authorities, ARRA in Addis Ababa and its site offices, before  
37  
38 participants gave us their informed consent. High scorers on PTSD and depression symptom  
39  
40 scales were encouraged to visit refugee counselors or to obtain psychiatric care from local  
41  
42 healthcare staff. Findings of this study will be disseminated to the research participants through  
43  
44 workshops and briefing sessions.  
45  
46  
47  
48  
49  
50  
51  
52  
53  
54  
55  
56  
57  
58  
59  
60

## Measures

Traumatic events were measured using the Pre and Post Migration Living Difficulties Checklist.<sup>1</sup>

This tool was developed and used to measure traumatic events of Zimbabwean refugees in South Africa in pre and post-migration periods. It has a 14-item checklist with five point response format (i.e. strongly disagree score = 1; disagree = 2; neutral = 3; agree = 4, and strongly agree = 5). Examples of items include: “I was beaten and harassed; I was sexually harassed”. In order to differentiate those who had encountered trauma from those who had not, the authors re-coded responses 1 to 3 as 0 and 4 to 5 as 1.<sup>28</sup> In the pilot study (n=50), internal consistency alpha values of 0.86 and 0.83 were obtained for pre-migration and post-migration living difficulties, respectively. Confirmatory Factor Analysis (CFA) in the main study sample (n=562) indicated that the two factors structure of pre-migration living difficulties had an acceptable fit to the present data: chi-square ( $\chi^2$ )=172.444; chi-square to degree of freedom ( $\chi^2/df$ )= 2.874; Comparative Fit Index (CFI) =0.971; Tucker Lewis Index (TLI) =0.951; Root Mean Square Error of Approximation(RMSEA)=0.058 (90%CI = 0.048, 0.068); Standardized Root Mean Residual (SRMR) = 0.0402. In this model the first factor, threat for life (9-items), and the second factor, threat for abuse (5-items), had good internal consistency (Cronbach’s alpha 0.88 and 0.82, respectively). Two factor structures of post-migration living difficulties have demonstrated acceptable fit to the present data:  $\chi^2$ =202.576;  $\chi^2/df$  =3.554; CFI=0.950; TLI=0.919; RMSEA= 0.067(90%CI 0.058, 0.078). The first factor, threat for life (9-items) and the second factor, threat for abuse (5-items) are internally consistent (Cronbach’s alpha values 0.68 and 0.72 respectively). Besides, the item level Content Validity Index (I-CVI) for the fourteen items in the present study ranged from 0.86 to 1.00. The scale level average content validity index (S-CVI/Ave) was found to be 0.98.

1  
2  
3  
4  
5  
6 Depression was measured using the Center for Epidemiologic Studies Depression Scale (CES-  
7  
8 D).<sup>29</sup> The English version of CES-D is a 20 item scale with four alternative response options:  
9  
10 none of the time, a little of the time, a moderate amount of the time and most of the time, to be  
11  
12 scored 0 to 3.<sup>29</sup> One example of an item reads: “I was bothered by things that usually do not  
13  
14 bother me”. This instrument is designed to measure depressive symptomatology in the general  
15  
16 population.<sup>29</sup> The CES-D was translated into Tigrigna and validated for Tigrigna speaking  
17  
18 Eritrean refugees in the United States, and the adaptation study found an alpha value of 0.86 for  
19  
20 internal consistency and 0.91 for test re-test reliability.<sup>30</sup> The internal consistency in our pilot  
21  
22 study was 0.92(n=50) and 0.91 in the main study (n=562). After allowing unique values to  
23  
24 correlate, Confirmatory Factor Analysis (CFA) suggested that the present data best fitted with  
25  
26 two dimensions of negative affect and positive affect with a second order single factor model  
27  
28 ( $\chi^2= 271.65$ ;  $df=144$ ;  $CFI=0.975$ ;  $TLI= 0.967$ ;  $SRMR= 0.0378$ ;  $RMSEA=.04$ ). All the 20 items  
29  
30 loaded sufficiently onto either of these two dimensions better than other computing factor  
31  
32 structures of CES-D in the literature. Thus, composite reliability alpha of the two factors  
33  
34 negative affect (16 Items) had an alpha value of 0.93, whereas the positive affect (4 items) had  
35  
36 an alpha value of 0.70 (n=562). The I-CVI values for the 20 items ranged from 0.71 to 1.00 and  
37  
38 S-CVI/ Ave for the total scale was found to be 0.92.  
39  
40  
41  
42  
43  
44  
45  
46

47 PTSD was measured using the Primary Care PTSD Screener (PC-PTSD).<sup>31</sup> This is a four item  
48  
49 brief screening instrument, having two response options, ‘Yes’ or ‘No’.<sup>31</sup> This scale has one  
50  
51 common instruction for all items , “In your life, have you ever had any experience that was  
52  
53 so frightening, horrible or upsetting that, in the past month...”. One example item is: “Have  
54  
55  
56  
57  
58  
59  
60

1  
2  
3 had nightmares about it or thought about it when you did not want to?"<sup>31</sup> Test re-test reliability  
4 was found to be 0.83.<sup>32</sup> Sensitivity and specificity of PC-PTSD was 0.78 and 0.87, respectively.<sup>31</sup>  
5  
6 The scale has been extensively used to study PTSD in veterans in United States,<sup>31-32</sup> Afghanistan  
7 and Iraq;<sup>33</sup> its use for screening PTSD in refugees is also documented.<sup>34-35</sup> In the present study,  
8 the internal consistency alpha value was found to be 0.68 in the pilot study (n=50) and 0.64 in  
9 the main study (n=562). Item-total correlation for the four items ranged from 0.59 to 0.75 in the  
10 pilot study. For the four items, Item level Content Validity Index (I-CVI) was 1, which makes  
11 the overall Scale level Item Validity Index (S-IVI) to be 1. Principal Component Analysis (PCA)  
12 showed that the four items loaded on a single factor (ranging from 0.58 to 0.82). Similarly, CFA  
13 showed that all the four items, each of which basically represents one factor structure of PTSD,  
14 loaded adequately onto a single dimension, ranging from 0.43 (numbing) to 0.78 (re-  
15 experiencing). The present data showed closer fit with a single factor structure of PTSD with fit  
16 indices of  $\chi^2=17.275$ ;  $\chi^2/df = 8.622$ , CFI=0.963; TLI=0.888; RMSEA=0.117(90%CI=0.070,  
17 0.17), SRMR=0.0355.  
18  
19  
20  
21  
22  
23  
24  
25  
26  
27  
28  
29  
30  
31  
32  
33  
34  
35  
36  
37

38 Coping strategies were measured using a Coping Style Scale,<sup>18</sup> which consists of 10 items. The  
39 items require participants to respond "this is not like me" or "this is like me".<sup>18</sup> The first set of 4-  
40 items follow one scenario: "Imagine, someone is spreading damaging gossip about you". One  
41 example of the item that follows this reads: "Some people would try to find the person who  
42 began the gossip and discuss it with him/her".<sup>18</sup> The second set of 6-items follow an imagined  
43 scenario "Imagine that some property of yours, money, food or object of value is lost or stolen",  
44 one example of items following this is "some people would avoid thinking about the loss or  
45 theft".<sup>18</sup> This instrument was cross-culturally validated by Trans-cultural Psychosocial  
46  
47  
48  
49  
50  
51  
52  
53  
54  
55  
56  
57  
58  
59  
60



1  
2  
3 Organization (TPO), and later used to study coping strategies from among displaced Ethiopians  
4 from Eritrea during the secession of Eritrea from Ethiopia.<sup>18,36</sup> This scale roughly captured three  
5 coping strategies, which include: task-oriented, avoidance-oriented and emotion-oriented coping  
6 strategies.<sup>18</sup> In the present study, the internal consistency alpha value was found to be 0.61 in the  
7 pilot study (n=50) and 0.48 in the main study (n=562). The three factors of coping have  
8 demonstrated reasonable fit to the present data with exclusion of item8 ( $\beta = 0.014$ ,  $p > 0.05$ ). The  
9 remaining 9-items had a close fit to the data:  $\chi^2 = 54.549$ ;  $\chi^2/df = 2.273$ ; CFI=0.901; TLI= 0.851;  
10 RMSEA=0.048(90%CI=0.031, 0.064).  
11  
12  
13  
14  
15  
16  
17  
18  
19  
20  
21  
22  
23

24 Resilience was measured using the Sense of Coherence Scale (SoC-13).<sup>37</sup> This is a 13-item  
25 semantic differential scale adapted for Eritrean culture in the form of a 5-point Likert scale from  
26 the original 7-point scale to reduce complexity.<sup>14</sup> For example, item-1 asks: “Do you have a  
27 feeling that you don’t really care about what goes on around you? Response options range from  
28 “very seldom or never’ to be scored as 1 and ‘very often’ to be scored as 5.<sup>14</sup> Responses for the  
29 items 1, 2, 3, 7, and 10 were reverse coded as per previous study.<sup>38</sup> The instrument has been  
30 reported to be an adequate measure of resilience in an Eritrean population.<sup>14</sup> Despite the  
31 conflicting findings regarding the dimensionality of SoC-13,<sup>39</sup> our data in the present study fitted  
32 well into a single factor structure, except for item-2. Twelve items demonstrated significant  
33 loadings onto a single factor ( $\chi^2 = 57.54$ ;  $df = 34$ ;  $\chi^2/df = 1.69$ ; CFI= 0.98; RMSEA= 0.035 (90%  
34 CI=0.02, 0.05), which gives supporting evidence that it measures a one dimensional construct as  
35 proposed by the original scale developer.<sup>37</sup> Cronbach’s alpha value for internal consistency in the  
36 pilot study (n=52) and the main study (n=562) were 0.67 and 0.74, respectively.  
37  
38  
39  
40  
41  
42  
43  
44  
45  
46  
47  
48  
49  
50  
51  
52  
53  
54  
55  
56  
57  
58  
59  
60

1  
2  
3 Social support was measured using the Oslo Social Support Scale (OSS-3).<sup>9</sup> This is a scale  
4  
5 consisting of three items in which the sum of scores ranges from 3-14.<sup>40</sup> In a validation study of  
6  
7 OSS-3 in Nigeria, Cronbach's alpha value for internal consistency was found to be 0.5.<sup>40</sup> In our  
8  
9 pilot study (n=52), Cronbach's alpha value was 0.39 and the alpha value for the main study was  
10  
11 0.58 (n=562). CFA indicated that all the items significantly and adequately loaded onto a single  
12  
13 factor ranging from 0.49 to 0.68, with fit indices of  $\chi^2=4.233$ ,  $\chi^2/df=4.233$ ,  
14  
15 CFI=0.978, TLI=0.934, RMSEA=0.076 (90%CI=0.014,0.156). All the items received I-CVI of 1,  
16  
17 which makes S-CVI to be 1 for the total scale.  
18  
19

### 20 21 **Statistical analysis**

22  
23 Associations and direction of associations tested in this study were based on the existing  
24  
25 literature. Path analysis was performed to test the significance of association and to identify  
26  
27 direct and indirect effects of variables using IBM SPSS Amos, version, 21. The effect of  
28  
29 interaction among some coping sub-scales with sub-scales of pre and post-migration living  
30  
31 difficulties was calculated by multiplying the respective variables; thereby interaction terms  
32  
33 were created. Then, the effect of each interaction term was tested for its significance of  
34  
35 association with PTSD or depression symptoms using independent path analysis For Item-level  
36  
37 Content Validity Index (I-CVI) values of 0.78 or higher are considered to be valid indices for  
38  
39 content validity if the instrument is rated by 6 to 10 experts.<sup>26</sup> In the present study, the cut-off  
40  
41 values for fit indices of an acceptable model included values of  $\chi^2/df$  less than 3; greater than or  
42  
43 equal to 0.95 for CFI; greater than or equal to 0.95 for TLI; less than or equal to 0.06 to 0.08 for  
44  
45 RMSEA, and less than or equal to 0.08 for SRMR.<sup>41</sup>  
46  
47  
48  
49  
50  
51  
52  
53  
54  
55  
56  
57  
58  
59  
60

## Results

### Socio-demographic characteristics of participants

Of the 562 participants (Table-1), 304(54.1%) were females. Age ranged from 18-74 years (with mean age=29.6, SD=10.18); the majority was literate and the average duration of stay in the refugee camp was 3.71 years. A high proportion of participants belonged to the Tigrinya ethnic group (92%). Very few participants came from Saho, Bilen, Tigre and Jabelty ethnic groups of Eritrea (constituting 8% altogether). Eighty five percent were followers of Coptic Orthodox Christianity. Participants had a diverse profile of occupations before coming to Ethiopia, but students, ex-soldiers and farmers constituted 71%.

Table-1: The demographic characteristics of participants

| Characteristics            |                           | Number (%)  |
|----------------------------|---------------------------|-------------|
| Sex                        | Male                      | 258 (45.9)  |
|                            | Female                    | 304 (54.1)  |
| Age                        | Mean(SD)                  | 29.6 (10.2) |
|                            | 18-24                     | 205 (36.5)  |
|                            | 25-34                     | 219 (39.0)  |
|                            | 35-44                     | 89 (15.8)   |
|                            | 45-54                     | 29 (5.2)    |
|                            | 55-64                     | 15 (2.5)    |
|                            | 65-74                     | 5 (0.9)     |
| Educational Background     | Non-literate              | 67 (11.9)   |
|                            | Elementary school         | 232 (41.3)  |
|                            | Secondary school          | 238 (42.3)  |
|                            | College graduate or above | 25 (4.5)    |
| Marital status             | Single                    | 189 (33.6)  |
|                            | Married                   | 327 (58.2)  |
|                            | Divorced                  | 29 (5.2)    |
|                            | Widowed                   | 17 (3.0)    |
| Religion                   | Orthodox                  | 477 (84.9)  |
|                            | Protestant                | 17 (3.0)    |
|                            | Catholic                  | 23 (4.1)    |
|                            | Muslim                    | 44 (7.8)    |
|                            | Jehovah witness           | 1 (0.2)     |
| Past occupation in Eritrea | Student                   | 201 (35.8)  |
|                            | Military                  | 111 (19.8)  |
|                            | Farmer                    | 89 (15.8)   |
|                            | Home maid                 | 66 (11.7)   |
|                            | Educator                  | 23 (4.1)    |
|                            | Daily laborers            | 15 (2.7)    |
|                            | Others                    | 57 (10.1)   |

### Direct and mediating predictors of PTSD and depression symptoms

The path model as shown in figure-1 fitted well with the data: [ $\chi^2=39.97$ ;  $df = 24$ ;  $\chi^2/df = 1.67$ ; CFI=0.985; TLI= 0.972; SRMR=0.05; RMSEA=0.034 (90% CI=0.013, 0.053);  $p=0.022$ ]. In examining the paths in detail, both pre-migration ( $\beta=-0.19$ ,  $p<0.001$ ) and post-migration ( $\beta = -0.15$ ,  $p<0.001$ ) traumatic events were significantly associated with sense of coherence. Sense of coherence in turn was significantly and negatively associated with symptoms of PTSD ( $\beta = -0.16$ ,  $p<0.001$ ) and depression ( $\beta= -0.40$ ,  $p<0.001$ ) (Table-2). Pre-migration living difficulties were directly associated with symptoms of PTSD ( $\beta=0.09$ ,  $p <0.05$ ) and with depression ( $\beta= 0.35$ ,  $p < 0.001$ ). It was also indirectly associated with depression via sense of coherence and post-migration living difficulties. Post-migration living difficulties were directly associated with depression symptoms ( $\beta= 0.23$ ,  $p<0.001$ ) and indirectly associated with PTSD symptoms via sense of coherence, symptoms of depression, and task-oriented coping style.

Table 2: Path coefficients between predictors and endogenous variables in the path model

| Predictors                  | Endogenous variables      | Unstandardized Estimate(95%,CI) | Standard Error | Standardized Path Coefficient | p-values |
|-----------------------------|---------------------------|---------------------------------|----------------|-------------------------------|----------|
| Pre-migration difficulties  | Post-migration            | 0.21 (0.17, 0.25)               | 0.021          | 0.39                          | p<0.001  |
| Post-migration difficulties | Sense of coherence        | -0.21 (-0.32, -0.10)            | 0.056          | -0.15                         | p<0.001  |
| Pre-migration difficulties  | Sense of coherence        | -0.14 (-0.20, -0.08)            | 0.031          | -0.19                         | p<0.001  |
| Social support              | Sense of coherence        | 1.28 (1.01, 1.55)               | 0.139          | 0.35                          | p<0.001  |
| Sense of coherence          | Depression                | -0.59 (-0.68, -0.50)            | 0.046          | -0.40                         | p<0.001  |
| Pre-migration difficulties  | Depression                | 0.38 (0.31, 0.45)               | 0.034          | 0.35                          | p<0.001  |
| Post-migration difficulties | Depression                | 0.46 (0.34, 0.58)               | 0.062          | 0.23                          | p<0.001  |
| Pre-migration difficulties  | Duration of stay          | 0.02 (0.00, 0.04)               | 0.011          | 0.09                          | p<0.05   |
| Social support              | Depression                | -0.78 (-1.05, -0.51)            | 0.162          | -0.14                         | p<0.001  |
| Post-migration difficulties | Task-oriented coping      | 0.03 (0.01, 0.05)               | 0.008          | 0.16                          | p<0.001  |
| Social support              | Task-oriented coping      | 0.13 (0.09, 0.17)               | 0.022          | 0.22                          | p<0.001  |
| Duration of stay            | PTSD                      | 0.07 (0.04, 0.10)               | 0.017          | 0.14                          | p<0.001  |
| Sense of coherence          | Avoidance-oriented coping | -0.01(-0.02, -0.002)            | 0.004          | -0.14                         | p<0.001  |
| Sense of coherence          | PTSD                      | -0.03 (-0.04, -0.02)            | 0.007          | -0.16                         | p<0.001  |
| Pre-migration difficulties  | PTSD                      | 0.01 (0.00, 0.02)               | 0.005          | 0.09                          | p<0.05   |
| Depression                  | PTSD                      | 0.04 (0.03, 0.05)               | 0.006          | 0.38                          | p<0.05   |
| Task-oriented coping        | PTSD                      | -0.07(-0.14, -0.004)            | 0.038          | -0.07                         | p<0.05   |
| Pre-migration difficulties  | Emotion-oriented coping   | 0.01 (0.004, 0.02)              | 0.003          | 0.09                          | p<0.001  |
| Sense of coherence          | Emotion-oriented coping   | -0.01(-0.02, -0.002)            | 0.004          | -0.14                         | p<0.01   |

Duration of stay in the refugee camp, sense of coherence, post-migration living difficulties, task-oriented coping style and depression together mediated the association between pre-migration living difficulties and PTSD symptoms (standardized indirect coefficient = 0.26,  $p < 0.01$ ). Similarly, task-oriented coping style, sense of coherence and depression symptoms together mediated the association between post-migration living difficulties and PTSD symptoms (standardized indirect coefficient= 0.13,  $p < 0.01$ ) (Table 3).

Table 3: Mediation analysis between exposure to trauma during pre and post- migration period and symptoms (PTSD and depression)

| Hypothesized relationship                      | Mediating variables                                                                                                    | Standardized Direct Effect | Standardized Indirect Effect | Result             |
|------------------------------------------------|------------------------------------------------------------------------------------------------------------------------|----------------------------|------------------------------|--------------------|
| Pre-migration living difficulties→ PTSD        | Duration of stay in the camp, sense of coherence, post-migration living difficulties, task-oriented coping, depression | 0.09*                      | 0.26 <sup>£</sup>            | Partially mediated |
| Post-migration living difficulties → PTSD      | Task-oriented coping, sense of coherence and depression                                                                | -0.05 (n.s)                | 0.13 <sup>£</sup>            | Partially mediated |
| Pre-migration living difficulties→ Depression  | Sense of coherence and post-migration living difficulties                                                              | 0.35 <sup>¥</sup>          | 0.19 <sup>£</sup>            | Partially mediated |
| Post-migration living difficulties→ Depression | Sense of coherence                                                                                                     | 0.23 <sup>¥</sup>          | -0.06 <sup>£</sup>           | Partially mediated |

\* p< 0.05; <sup>£</sup> p< 0.01; <sup>¥</sup> p< 0.001; n.s = not significant

Pre-migration and post migration living difficulties were not significantly associated with social support. Hence, social support was not a mediator for the association between exposure to trauma and symptoms in this path model (see figure-1).

Figure-1: Path model depicting direct and indirect (mediated) association between exposure to trauma and mental health outcomes.

The association between pre-migration living difficulties and depression was strengthened by exposure to post-migration living difficulties ( $\beta= 0.23$ ,  $p< 0.001$ ). Pre-migration living difficulties were significantly and positively associated with emotion-oriented coping style ( $\beta= 0.09$ ,  $p < 0.05$ ) as well as post-migration living difficulties ( $\beta=0.39$ ,  $p < 0.001$ ). On the other hand, post-migration living difficulties were associated positively with task-oriented coping style



( $\beta=0.16$ ,  $p < 0.001$ ). Depression partially mediated and strengthened the association between post-migration trauma and symptoms of PTSD ( $\beta= 0.38$ ,  $p < 0.001$ ).

### Moderators

Test for moderation (interaction effect) (Table-4) illustrates that sense of coherence and task-oriented coping style did not moderate the effect of pre/post-migration living difficulties on PTSD or depression symptoms ( $p > 0.05$ ). However, the interaction between social support and post-migration living difficulties resulted in an inverse association with depression ( $p < 0.05$ ), which shows a moderating role of social support on the effect of post-migration living difficulties on depression symptoms.

Table 4: Moderation analysis for sense of coherence, task-oriented coping style and social support

| Model | Main and interaction predictors                           | Standardized path coefficient to PTSD (n=562) | Standardized path coefficient to depression(n=562) |
|-------|-----------------------------------------------------------|-----------------------------------------------|----------------------------------------------------|
| 1     | Pre-migration living difficulties                         | 0.248 <sup>¥</sup>                            | 0.440 <sup>¥</sup>                                 |
|       | pre-migration living difficulties x Sense of coherence    | 0.057                                         | 0.022                                              |
|       | Sense of coherence                                        | -0.372 <sup>¥</sup>                           | -0.513 <sup>¥</sup>                                |
| 2     | Post-migration living difficulties                        | 0.103 <sup>£</sup>                            | 0.371 <sup>¥</sup>                                 |
|       | Post-migration living difficulties x Sense of coherence   | -0.036                                        | 0.053                                              |
|       | Sense of coherence                                        | -0.407 <sup>¥</sup>                           | -0.536 <sup>¥</sup>                                |
| 3     | Pre-migration living difficulties                         | 0.353 <sup>¥</sup>                            | 0.547 <sup>¥</sup>                                 |
|       | pre-migration living difficulties x Task-oriented coping  | 0.027                                         | -0.004                                             |
|       | Task-oriented coping                                      | -0.092 <sup>*</sup>                           | -0.012                                             |
| 4     | Post-migration living difficulties                        | 0.221 <sup>¥</sup>                            | 0.466 <sup>¥</sup>                                 |
|       | Post-migration living difficulties x task-oriented coping | -0.019                                        | -0.061                                             |
|       | Task-oriented coping                                      | -0.076                                        | 0.000                                              |
| 5     | Pre-migration living difficulties                         | 0.327 <sup>¥</sup>                            | 0.536 <sup>¥</sup>                                 |
|       | pre-migration living difficulties x social support        | 0.037                                         | -0.006                                             |
|       | social support                                            | -0.249 <sup>¥</sup>                           | -0.295 <sup>¥</sup>                                |
| 6     | Post-migration living difficulties                        | 0.193 <sup>¥</sup>                            | 0.445 <sup>¥</sup>                                 |
|       | Post-migration living difficulties x social support       | -0.029                                        | -0.106 <sup>*</sup>                                |
|       | Social support                                            | -0.253 <sup>¥</sup>                           | -0.259 <sup>¥</sup>                                |

<sup>¥</sup>p < 0.001, <sup>£</sup>p < 0.01, \* p < 0.05

1  
2  
3 Emotion-oriented coping style appeared to have a moderating effect upon PTSD symptoms, with  
4 an interaction with the threat for life sub-scale of pre-migration living difficulties both in females  
5  
6 ( $\beta = -0.120$ ,  $p < 0.05$ ) ( $n=304$ ) and males ( $\beta = -0.114$ ,  $p < 0.05$ ) ( $n=258$ ) (Table-5). Similarly, the  
7  
8 interaction between emotion-oriented coping styles with the threat for abuse sub-scale of pre-  
9  
10 migration trauma was negatively and significantly associated both with PTSD and depression  
11  
12 symptoms (model-6). Sub-group analysis by gender (Table-5: models 7-12) showed that  
13  
14 exposure to post-migration trauma was associated with symptoms of PTSD only in females  
15  
16  
17  
18  
19  
20  
21  
22  
23  
24  
25  
26  
27  
28  
29  
30  
31  
32  
33  
34  
35  
36  
37  
38  
39  
40  
41  
42  
43  
44  
45  
46  
47  
48  
49  
50  
51  
52  
53  
54  
55  
56  
57  
58  
59  
60

Table-5: The significance of path coefficients for the main effect and interaction effect for factors associated with symptoms of PTSD and depression.

| Model | Main and interaction predictors                      | Standardized path coefficient to PTSD |                     |                     | Standardized path coefficient to Depression |                     |                     |
|-------|------------------------------------------------------|---------------------------------------|---------------------|---------------------|---------------------------------------------|---------------------|---------------------|
|       |                                                      | Total (n=562)                         | Female (n=304)      | Male (n=258)        | Total (n=562)                               | Female (n=304)      | Male (n=258)        |
| 1     | Threat for life (Pre-migration)                      | 0.362 <sup>¥</sup>                    | 0.052 <sup>¥</sup>  | 0.421 <sup>¥</sup>  | 0.483 <sup>¥</sup>                          | 0.720 <sup>¥</sup>  | 0.484 <sup>¥</sup>  |
|       | Threat for life(pre-m) x Task-oriented coping        | 0.035                                 | 0.085               | 0.026               | 0.026                                       | 0.206               | 0.057               |
|       | Task-oriented coping                                 | -0.089 <sup>*</sup>                   | -0.055              | -0.094              | 0.009                                       | 0.768               | -0.044              |
| 2     | Threat for life (Pre-migration)                      | 0.362 <sup>¥</sup>                    | 0.317 <sup>¥</sup>  | 0.428 <sup>¥</sup>  | 0.492 <sup>¥</sup>                          | 0.514 <sup>¥</sup>  | 0.494 <sup>¥</sup>  |
|       | Threat for life(pre-m) x Avoidance-oriented coping   | -0.069                                | -0.048              | -0.059              | -0.046                                      | -0.021              | -0.030              |
|       | Avoidance-oriented coping                            | 0.021                                 | 0.081               | -0.038              | 0.028                                       | 0.115               | -0.044              |
| 3     | Threat for life (Pre-migration)                      | 0.362 <sup>¥</sup>                    | 0.319 <sup>¥</sup>  | 0.422 <sup>¥</sup>  | 0.483 <sup>¥</sup>                          | 0.514 <sup>¥</sup>  | 0.484 <sup>¥</sup>  |
|       | Threat for life(pre-m) x Emotion-oriented coping     | -0.127 <sup>£</sup>                   | -0.120 <sup>*</sup> | -0.114 <sup>*</sup> | -0.047                                      | -0.060              | -0.015              |
|       | Emotion-oriented coping                              | 0.001                                 | 0.006               | -0.020              | 0.053                                       | 0.067               | 0.021               |
| 4     | Threat for Abuse (Pre-migration)                     | 0.203 <sup>¥</sup>                    | 0.224 <sup>¥</sup>  | 0.181 <sup>£</sup>  | 0.504 <sup>¥</sup>                          | 0.538 <sup>¥</sup>  | 0.461 <sup>¥</sup>  |
|       | Threat for Abuse(pre-m) x Task-oriented coping       | 0.010                                 | 0.019               | -0.002              | -0.079 <sup>*</sup>                         | -0.098              | -0.060              |
|       | Task-oriented coping                                 | -0.066                                | -0.069              | -0.064              | -0.012                                      | 0.015               | -0.038              |
| 5     | Threat for Abuse (Pre-migration)                     | 0.195 <sup>¥</sup>                    | 0.206 <sup>¥</sup>  | 0.180 <sup>£</sup>  | 0.490 <sup>¥</sup>                          | 0.530 <sup>¥</sup>  | 0.450 <sup>¥</sup>  |
|       | Threat for Abuse(pre-m) x Avoidance-oriented coping  | -0.025                                | -0.006              | -0.024              | -0.005                                      | 0.030               | -0.017              |
|       | Avoidance-oriented coping                            | 0.034                                 | 0.077               | -0.002              | 0.030                                       | 0.089               | -0.014              |
| 6     | Threat for Abuse (Pre-migration)                     | 0.238 <sup>¥</sup>                    | 0.227 <sup>¥</sup>  | 0.269 <sup>¥</sup>  | 0.517 <sup>¥</sup>                          | 0.543 <sup>¥</sup>  | 0.495 <sup>¥</sup>  |
|       | Threat for Abuse(pre-m) x Emotion-oriented coping    | -0.180 <sup>¥</sup>                   | 0.133 <sup>*</sup>  | -0.240 <sup>¥</sup> | -0.116 <sup>£</sup>                         | -0.093              | -0.154 <sup>£</sup> |
|       | Emotion-oriented coping                              | -0.009                                | 0.011               | -0.036              | 0.006                                       | 0.030               | -0.024              |
| 7     | Threat for life (Post-migration)                     | 0.190 <sup>¥</sup>                    | 0.293 <sup>¥</sup>  | 0.078               | 0.449 <sup>£</sup>                          | 0.502 <sup>¥</sup>  | 0.400 <sup>¥</sup>  |
|       | Threat for life(post-m) x Task-oriented coping       | -0.035                                | -0.009              | -0.034              | -0.070 <sup>*</sup>                         | -0.056              | -0.090              |
|       | Task-oriented coping                                 | -0.073                                | -0.072              | -0.069              | 0.002                                       | 0.063               | -0.061              |
| 8     | Threat for life (Post-migration)                     | 0.182 <sup>¥</sup>                    | 0.281 <sup>¥</sup>  | 0.067               | 0.453 <sup>¥</sup>                          | 0.522 <sup>¥</sup>  | 0.382 <sup>¥</sup>  |
|       | Threat for life(post-m) x Avoidance-oriented coping  | -0.019                                | -0.013              | -0.016              | 0.029                                       | 0.045               | 0.017               |
|       | Avoidance-oriented coping                            | 0.037                                 | 0.083               | -0.002              | 0.050                                       | 0.114 <sup>*</sup>  | -0.007              |
| 9     | Threat for life (Post-migration)                     | 0.182 <sup>¥</sup>                    | 0.281 <sup>¥</sup>  | 0.063               | 0.452 <sup>¥</sup>                          | 0.521 <sup>¥</sup>  | 0.382 <sup>¥</sup>  |
|       | Threat for life(post-m) x Emotion-oriented coping    | .0004                                 | 0.034               | -0.040              | 0.008                                       | 0.000               | 0.012               |
|       | Emotion-oriented coping                              | 0.022                                 | 0.023               | 0.020               | 0.075 <sup>a</sup>                          | 0.061               | 0.088               |
| 10    | Threat for Abuse (Post-migration)                    | 0.206 <sup>¥</sup>                    | 0.281 <sup>¥</sup>  | 0.106               | 0.328 <sup>¥</sup>                          | 0.380 <sup>¥</sup>  | 0.280 <sup>¥</sup>  |
|       | Threat for Abuse(post-m) x Task-oriented coping      | 0.004                                 | 0.029               | -0.034              | -0.054                                      | -0.107 <sup>*</sup> | -0.002              |
|       | Task-oriented coping                                 | -0.061                                | -0.072              | -0.061              | 0.038                                       | 0.078               | -0.006              |
| 11    | Threat for Abuse (Post-migration)                    | 0.199 <sup>¥</sup>                    | 0.276 <sup>¥</sup>  | 0.093               | 0.329 <sup>¥</sup>                          | 0.387 <sup>¥</sup>  | 0.273 <sup>¥</sup>  |
|       | Threat for Abuse(post-m) x Avoidance-oriented coping | 0.024                                 | 0.025               | 0.049               | 0.033                                       | 0.040               | 0.023               |
|       | Avoidance-oriented coping                            | 0.052                                 | 0.097               | 0.013               | 0.069                                       | 0.126 <sup>*</sup>  | 0.014               |
| 12    | Threat for Abuse (Post-migration)                    | 0.201 <sup>¥</sup>                    | 0.272 <sup>¥</sup>  | 0.111               | 0.331 <sup>¥</sup>                          | 0.384 <sup>¥</sup>  | 0.278 <sup>¥</sup>  |
|       | Threat for Abuse(post-m) x Emotion-oriented coping   | -0.005                                | -0.018              | 0.003               | -0.033                                      | -0.014              | -0.052              |
|       | Emotion-oriented coping                              | 0.040                                 | 0.050               | 0.027               | 0.109 <sup>*</sup>                          | 0.111 <sup>*</sup>  | 0.106 <sup>*</sup>  |
| 13    | Task oriented coping                                 | -0.049                                | -0.025              | -0.072              | 0.038                                       | 0.114 <sup>*</sup>  | -0.039              |
|       | Task-oriented coping x Emotion –oriented coping      | -0.025                                | 0.014               | -0.067              | -0.125 <sup>£</sup>                         | -0.115 <sup>*</sup> | -0.148 <sup>*</sup> |
|       | Emotion-oriented coping                              | 0.033                                 | 0.043               | 0.035               | 0.098 <sup>*</sup>                          | 0.077               | 0.125 <sup>*</sup>  |

<sup>¥</sup>p< 0.001, <sup>£</sup> p< 0.01, \* p< 0.05

1  
2  
3  
4  
5  
6 Task-oriented coping style was independently and negatively associated with PTSD (Table 5:  
7 model-1), while emotion-oriented coping style showed a positive and independent association  
8 with depression (Table 5: models 9, 12 and 13). The interaction between emotion-oriented and  
9 task-oriented coping styles was negatively and significantly associated with depression both in  
10 females ( $\beta = -0.12$ ,  $p < 0.05$ ) and males ( $B = -0.15$ ,  $p < 0.05$ ). Emotion-oriented coping had an  
11 inverse association with symptoms when it interacted with other variables (Table 5: Model-3, 6  
12 and 13). An avoidance-oriented coping style was positively associated with symptoms of  
13 depression for females when tested as an independent predictor (Table 5: models-8 and 11).  
14  
15  
16  
17  
18  
19  
20  
21  
22  
23  
24

## 25 **Discussion**

26  
27 In the present study that aimed to investigate the mediating and moderating roles of theoretically  
28 relevant factors (i.e. sense of coherence, adaptive coping style and social support) between  
29 exposure to traumatic events and psychological symptoms, findings supported our alternative  
30 hypotheses. Sense of coherence partially mediated (but did not moderate) the effect of exposure  
31 to pre and post traumatic events on symptoms of PTSD and depression. The same effect was  
32 shown with a task-oriented coping style, which partially mediated (but did not moderate) the  
33 effect of exposure to post-migration traumatic events on PTSD symptoms. However, social  
34 support moderated the effect of post-migration living difficulties on symptoms of depression,  
35 whereas use of emotion-oriented coping strategies moderated the effect of exposure to pre-  
36 migration traumatic events on symptoms of PTSD and depression.  
37  
38  
39  
40  
41  
42  
43  
44  
45  
46  
47  
48  
49  
50  
51  
52

53 Our finding that the duration of stay in the refugee camp exacerbated symptoms is consistent  
54 with previous findings in Australia<sup>42</sup> where prolonged detention and temporary protection of  
55  
56  
57  
58  
59  
60

1  
2  
3 refugees contributed substantially to the risk of PTSD, depression and other mental health-  
4 related disabilities. The likely explanation for the exacerbating effect of longer duration of stay  
5  
6 for worsening symptoms of PTSD symptoms in the present study is that the longer refugees stay  
7  
8 in the camp, the greater the chance to be exposed to different post-migration traumas and abuses.  
9  
10 Meager support, limited employment opportunities and resources and being in this situation for a  
11  
12 prolonged period are also other stressors that could lead them to experience some form of  
13  
14 psychological symptoms. As refugees stay longer in the camp, their chance of leaving the camp  
15  
16 might decrease overtime, resulting in a sense of hopelessness that exacerbated their  
17  
18 psychological symptoms.  
19  
20  
21  
22  
23  
24  
25

26 The finding of increased use of emotion-oriented and task-oriented coping styles with increased  
27  
28 exposure to pre-migration and post-migration living difficulties, respectively, is in line with  
29  
30 previous findings of Tibetan refugees in India.<sup>5</sup> The indirect (mediated) effect of pre-migration  
31  
32 living difficulties on depression and PTSD symptoms via the path of post-migration living  
33  
34 difficulties seen in the present study has theoretical support in the literature.<sup>1,17</sup> The association  
35  
36 between pre-migration living difficulties and PTSD was mediated by post-migration living  
37  
38 difficulties among Zimbabwean refugees in South Africa.<sup>1</sup> A recent study has also reported that  
39  
40 post-migration stressors accounted for greater variance in the level of depression and anxiety  
41  
42 compared to experiences of trauma and loss.<sup>17</sup> This indicates that being exposed to pre-migration  
43  
44 trauma alone is not the sole factor affecting the mental wellbeing of refugees, but post-migration  
45  
46 living circumstances are also likely to play an intervening (mediating) role. The mediating role  
47  
48 of post-migration living difficulties in the present study can be best explained by the continuous  
49  
50 exposure of Eritrean refugees to stressful conditions of the camp life in Ethiopia, like poverty  
51  
52  
53  
54  
55  
56  
57  
58  
59  
60

1  
2  
3 and economic dependency, poor and overcrowded housing. These experiences are likely to  
4  
5 worsen the effect of exposure to traumatic events in their home country before migration.  
6  
7

8  
9 The association between sense of coherence and reduced symptoms of PTSD and depression in  
10  
11 this study is in line with reports from other studies that describe an inverse association between  
12  
13 sense of coherence and psychological distress in many cultural contexts.<sup>3, 14-15,37</sup> On the other  
14  
15 hand, sense of coherence mediated the association between traumatic events and psychological  
16  
17 symptoms in this study which is again in agreement with previous findings.<sup>3-4</sup> However, its  
18  
19 moderating role between exposure to trauma and psychological symptoms reported in other  
20  
21 studies<sup>7</sup> was not found in this study.  
22  
23  
24  
25  
26

27 The moderating role of social support seen in this study is in line with evidence of previous  
28  
29 studies.<sup>10</sup> However, this is unlike the recent report which indicated that perceived social support  
30  
31 had a moderating effect of exposure to trauma on symptoms of PTSD among Eritrean and  
32  
33 Sudanese asylum seekers in Israel.<sup>10</sup> The current findings showed that social support moderated  
34  
35 the effect of exposure to post-migration trauma on symptoms of depression. The absence of a  
36  
37 mediating role of social support between exposure to trauma and symptoms of PTSD and  
38  
39 depression is in agreement with findings from a study conducted in African Americans aged  
40  
41 between 18 and 54 in the National Co-morbidity Study, which reported that social support did  
42  
43 not mediate the effects of financial strain or traumatic events on psychological symptoms.<sup>43</sup>  
44  
45  
46  
47  
48  
49

50 A task-oriented coping style mediated the relationship between exposure to post-migration  
51  
52 trauma and symptoms of PTSD in this study, which signifies the importance of this coping  
53  
54 strategy for Eritrean refugees. This finding is also consistent with findings in Tibetan refugees in  
55  
56  
57  
58  
59  
60



1  
2  
3 India.<sup>5</sup> However, use of a task-oriented coping style did not have the moderating effect of  
4 exposure to trauma on psychological health indicated in previous studies, including the findings  
5 from displaced Ethiopians from Eritrea who were living in temporary shelters in Ethiopia.<sup>18</sup> An  
6 avoidance-oriented coping style was not found to be associated with lower symptoms in this  
7 studies, in contrast to findings from previous studies from Ethiopian<sup>18</sup> and Congolese sample,<sup>8</sup>  
8 where an avoidance-coping strategy was found to be beneficial. The likely explanation for this is  
9 the composition of the refugee participants: most were literate, with an urban-orientation.  
10  
11  
12  
13  
14  
15  
16  
17  
18  
19  
20

21 The strong association between depression and PTSD symptoms supported what was reported in  
22 the Zimbabwean sample.<sup>1</sup> However, since our finding was based on a cross-sectional study, it is  
23 noteworthy regarding the direction of causality because of the possibility that elevated symptoms  
24 of depression might have been driven by heightened symptoms of PTSD or vice-versa. The  
25 inverse association between the interaction term (i.e. emotion-oriented coping style and task-  
26 oriented coping style) and reduced symptoms of depression for both sexes seen in the present  
27 study has supported one of our hypotheses, and this finding is in line with the report from the  
28 Democratic Republic of Congo.<sup>8</sup>  
29  
30  
31  
32  
33  
34  
35  
36  
37  
38  
39  
40  
41

42 Our findings that PTSD symptoms are differentially associated with post-migration trauma in  
43 females, not in males, may imply the ongoing gender-based vulnerability of female refugees to  
44 post-migration abuses in the refugee camps, which are also reported in previous studies  
45 conducted in refugee camps in Ethiopia.<sup>44-45</sup> Particularly, gender based physical violence was  
46 reported in a previous study from Eritrean refugee population living in Shimelba, one of the  
47 biggest refugee camps in Northern Ethiopia.<sup>44</sup> Another study in Somali female refugees reported  
48  
49  
50  
51  
52  
53  
54  
55  
56  
57  
58  
59  
60

1  
2  
3 that they were vulnerable to rape during transit and abduction in the refugee camp in South  
4 Eastern Ethiopia.<sup>45</sup> The pre/post-migration living difficulties in this study should be understood  
5  
6 with caution because Eritrean refugees traveled only a short distance to cross the border to a  
7  
8 neighboring country that has a similar culture. The essence of pre/post migration living  
9  
10 difficulties described in the literature denotes something different for refugees who had traveled  
11  
12 long distances and those who had entirely different culture in comparison with the culture of the  
13  
14 host country.  
15  
16  
17  
18  
19  
20

21 The association between emotion-oriented coping style and reduced symptoms of PTSD, when it  
22  
23 interacted with the threat for life sub-scale of pre-migration difficulties may imply that this  
24  
25 coping style has a potential benefit for those persons who encountered life threatening trauma.  
26  
27 This coping strategy may help to release traumatic memories, thereby reducing PTSD symptoms.  
28  
29 The moderating effect of emotion-oriented coping strategy for pre-migration abuse (sexual and  
30  
31 physical) in reducing symptoms (PTSD and depression) implies its potential use for refugees  
32  
33 who had experienced abuse in Eritrea to deal with symptoms of both conditions. The protective  
34  
35 role of this coping style was also reported by previous studies in other African humanitarian  
36  
37 settings.<sup>8,18</sup>  
38  
39  
40  
41  
42  
43  
44

### 45 **Implications of the findings**

46 The differential association between PTSD symptoms and post-migration living difficulties for  
47  
48 females, unlike males, may necessitate intervention for ongoing post-migration traumatic abuses  
49  
50 uniquely for female refugees. This finding also informs national and international policy makers  
51  
52 for special protection of women refugees from violation of their human rights.  
53  
54  
55  
56  
57  
58  
59  
60

1  
2  
3 The current finding that duration of stay in camp mediated the effect of pre-migration trauma on  
4 PTSD calls for accelerated resettlement, repatriation or integration of Eritrean refugees within  
5 the host society. Enhancement of social support for the refugees also seems important, because  
6 this study has shown that it has a fairly strong positive association with increased sense of  
7 coherence, which in turn is associated with decreasing symptoms of PTSD and depression. Future  
8 studies should focus on longitudinal study designs to replicate the present findings from Eritrean  
9 samples in humanitarian settings.  
10  
11  
12  
13  
14  
15  
16  
17  
18  
19  
20

21 **Acknowledgments:** Our appreciation primarily goes to a senior Ethiopian mental health researcher, Dr Teshome Shibre kelkilie,  
22 who is presently living in Canada, for his invaluable support in revising the research protocol and his inspiring encouragements  
23 from the inception of this study till its completion. Dr Charlotte Hanlon and Dr Abebaw Fekadu in Addis Ababa University,  
24 department of psychiatry, also deserve special thanks for their vital input, having a worthwhile contributions to shape this paper  
25 to be in its present form. We are grateful to Prof. Terry B. Northcut from Loyola University Chicago, School of Social work  
26 (United States), for her kind assistance in editing the language on the final version of the manuscript. We would also like to thank  
27 head office of Administration of Refugee and Returnees Affairs (ARRA) in Addis Ababa, and its district office in Shire in  
28 Ethiopia for permission to conduct this study. Furthermore, we would like to acknowledge the worthwhile contribution made by  
29 healthcare staff of ARRA and center for victims of Trauma (CVT) in Shire and Mai Aini refugee camp for their unreserved  
30 support during the entire period of data collection, and all the participants of the study who shared their experiences without  
31 reservation.  
32  
33  
34  
35  
36  
37  
38  
39  
40  
41

42 **Funding:** This study was financially supported by Addis Ababa University and University of Gondar, Ethiopia  
43  
44

45 **Data availability and sharing:** All necessary data to understand in manuscript (MS) is included in tables or text within the MS.  
46 The raw data in SPSS format will be deposited in the Department of Psychiatry, Addis Ababa University (AAU), and can be  
47 accessed in accordance with data sharing policy of Institutional Review Board (IRB) of College of Health Sciences, AAU.  
48  
49  
50

51 **Authors' contributions:** BG is the Principal Investigator (PI) of this study. He led in generating the research idea, design and  
52 methods of the study, writing the research protocol, validating measures, data collection, analysis, interpretation and writing of  
53 the findings. AA has made contribution in revising the research protocol, the research design, validation of measures, analysis  
54  
55  
56  
57  
58  
59

1  
2  
3 and interpretation of data, and critically reviewing the final manuscript. GM made contribution in checking and editing the  
4 statistical analysis and critically reviewing of the drafted manuscript. All the authors approved the final version.  
5  
6  
7

8 **Ethical Considerations:** This study had ethical clearance from Institutional Ethical Review Board (IRB) of College of Health  
9 Sciences, Addis Ababa University. Participants were provided with information sheet about the study regarding its objective,  
10 relevance, beneficence, risk, participant's rights and others. Then, a written consent from each participant was obtained before  
11 engaging him/her to participate. Ethical issues as outlined by declaration of Helsinki for human participants in medical research  
12 were adhered.  
13  
14  
15  
16  
17

18 **Competing interests:** Authors declare that there is no conflict of interest.  
19  
20  
21  
22

## 23 References

- 24 1. Idemudia ES, Williams JK, Wyatt G. Gender difference in Trauma and Post traumatic Stress Symptoms  
25 among Displaced Zimbabweans in South Africa. *J Trauma Stress Disorder Treat* 2013; 2(3): 1340.
- 26 2. Brumsey AD, Joseph NT, Myers HF, et al. Modeling the Relationship between Trauma and Psychological Distress  
27 among HIV-Positive and HIV-Negative Women. *Psychol Trauma*, 2013; 5(1): 69–76.
- 28 3. Nosheen,A, Riaz,MN, Batoo,N. Cross-Cultural Study on Social Support, Sense of Coherence and Outcomes in  
29 Pakistan and Germany. *Pakistan Journal of Commerce and Social Sciences* 2014; 8 (2):445- 452.
- 30 4. Veronese G, Pepe A. Sense of coherence mediates the effect of trauma on the social and emotional functioning of  
31 Palestinian health providers. *American Journal of Orthopsychiatry* 2014; 84(5): 597-606.
- 32 5. Sachs B, Rosenfeld B. Lhewa,D, et al. Entering Exile: Trauma, Mental Health, and Coping Among Tibetan  
33 Refugees Arriving in Dharamsala, India. *Journal of Traumatic Stress* 2008; 21(2): 199–208.
- 34 6. Antonovsky, A. Unravelling the Mystery of Health. How People Manage Stress and Stay Well. Jossey-Bass, 1987,  
35 San Francisco.
- 36 7. Pham PN, Vinck P, kinkodi DK, et al. Sense of coherence and its Association with Exposure to traumatic events,  
37 post traumatic stress disorder, and depression in Eastern Democratic Republic of Congo. *Journal of Traumatic*  
38 *Stress* 2010; 23(3):313–321.  
39  
40  
41  
42  
43  
44  
45  
46  
47  
48  
49  
50  
51  
52  
53  
54  
55  
56  
57  
58  
59  
60

- 1
  - 2
  - 3
  - 4
  - 5
  - 6
  - 7
  - 8
  - 9
  - 10
  - 11
  - 12
  - 13
  - 14
  - 15
  - 16
  - 17
  - 18
  - 19
  - 20
  - 21
  - 22
  - 23
  - 24
  - 25
  - 26
  - 27
  - 28
  - 29
  - 30
  - 31
  - 32
  - 33
  - 34
  - 35
  - 36
  - 37
  - 38
  - 39
  - 40
  - 41
  - 42
  - 43
  - 44
  - 45
  - 46
  - 47
  - 48
  - 49
  - 50
  - 51
  - 52
  - 53
  - 54
  - 55
  - 56
  - 57
  - 58
  - 59
  - 60
8. Cherewick M, Tol W, Burnham G, Doocy S, et al. A structural equation model of conflict-affected youth coping and resilience. *Health Psychology and Behavioral Medicine* 2016; 4(1): 155–174.
9. Dalgard OS, Dowrick C, Lehtinen V, et al. Negative life events, social support and gender difference in depression: A multinational community survey with data from the ODIN study. *Soc Psychiatry PsychiatrEpidemiol*2006; 41: 444-451.
10. Nakasha O, Nagara M, Shoshania A, et al. The association between perceived social support and post traumatic stress symptoms among Eritrean and Sudanese male asylum seekers in Israel. *International Journal of Culture and Mental Health*2017;doi - 10.1080/17542863.2017.1299190.
11. Lazarus, R. S., &Folkman, S. Psychological Stress and the Coping Process. New York, 1984; Appleton-Century-Crofts.
12. Voges MA. and Romney DM. Risk and Resiliency Factors in Post Traumatic Stress Disorder, *Annals of General Hospital Psychiatry* 2003; 2:4, <https://doi.org/10.1186/1475-2832-2-4>.
13. HoobermanJ, Rosenfeld B, Rasmussen A, et al. Resilience in Trauma-Exposed Refugees: The Moderating Effect of Coping Style on Resilience Variables. *American Journal of Orthopsychiatry* 2010; 80 (4):557–563.
14. Almedom A, Tesfamichael B, Mohammed ZS, et al. Use of ‘sense of coherence (soc) scale to measure resilience in Eritrea: Interrogating both the data and the scale. *J.biosoc.Sci* 2007; 39: 91–107.
15. Aljurany H. Personality characteristics, trauma and symptoms of PTSD: A population based study in Iraq. *PhD dissertation*2013; Heriot Watt University.
16. Li M. The Relationship among Sense of Coherence, Coping Strategies, and Interpersonal Patterns: A Cross-Cultural Study, *American Counseling Association, VISTAS online* 2015; 63:1-10.
17. Miller KE, Rasmusse A. The mental health of civilians displaced by armed conflict: an ecological model of refugee distress. *Epidemiology and Psychiatric Sciences* 2016; doi:10.1017/S2045796016000172
18. ArayaM,Chotai J, KomproeJ.H, de Jong JTV. Gender differences in traumatic life events, coping strategies, perceived social support and socio-demographics among post-conflict displaced persons in Ethiopia. *Social psychiatry Psychiatric epidemiol* 2007; 42: 307-315.
19. Women’s Refugee Commission. Young and Astray, An Assessment of Driving the Movement of An Accompanied Children and Adolescents from Eritrea into Ethiopia, Sudan and Beyond. 2013; New York.

- 1  
2  
3 20. United Nations Higher Commissioner for Refugees. Ethiopia, Operational Overview: Camp Demographic  
4 Population statistics by Office and Region (As of 31 August 2013).  
5  
6 <https://reliefweb.int/sites/reliefweb.int/files/resources/Auguststatisticspackage.pdf>  
7
- 8  
9 21. United Nations Higher Commissioner for Refugees. Mai Aini refugee camp. Camp profile Shire as of 31<sup>st</sup>  
10 January,2018.UNHCR,Ethiopia,<https://data2.unhcr.org/ar/documents/download/62694>  
11
- 12  
13 22. de Jong JT, Komproe IH, Van Ommeren M, et al: Lifetime Events and Posttraumatic Stress Disorder in 4 Post-  
14 conflict Settings, *Journal of American Medical Association*, 2007; 266(5):255-262.  
15
- 16  
17 23. OnyutLP, Patience L, Neuner F, et al. The Nakivale Camp Mental Health Project: Building Local Competency for  
18 Psychological assistance to Traumatized Refugees, *Intervention* 2004; 2(2): 90-107.  
19
- 20  
21 24. Kamau M, Silove D,Steel Z, Catanzaro R, et al. Psychiatric Disorders in an African Refugee Camp. *Intervention*  
22 2004; 2(2):84 –89  
23
- 24  
25 25. Ommern MV and de Jong JTV. Preparing instruments for cross-cultural research. Use of the translation monitoring  
26 form with Nepali speaking Bhutanese refugees, *Trans-cultural psychiatry* 1999; 36(3):285-301.  
27
- 28  
29 26. Lynn MR. Determination and Quantification Of Content Validity. *Nursing Research* 1986; 35(6): 382–386.  
30
- 31  
32 27. Polit DF and Beck CT. The Content Validity Index: Are you sure you know what’s being reported? Critique and  
33 recommendations. *Research in Nursing & Health*, 2006; 29: 489–497.  
34
- 35  
36 28. Idemudia ES, Williams JK, Madu SN, et al. Trauma Exposures and Post traumatic Stress among Zimbabwean  
37 refugees in South Africa. *Life Science Journal* 2013; 10 (3): 2397-2497.  
38
- 39  
40 29. Radloff, LS. The CES-D Scale: A Self-Report Depression Scale for Research in the General Population. *Applied*  
41 *Psychological measurement* 1977; 1(3): 385-401.  
42
- 43  
44 30. Moges MF. Translation And Adaptation Of The Center For Epidemiologic Studies-Depression (CES-D) Scale into  
45 Tigrigna Language For Tigrigna Speaking Eritrean Immigrants in the United States (Phd Thesis), University of  
46 South Florida, *ProQuest Dissertations Publishing* 2011; 3464689.  
47
- 48  
49 31. Prins A, Ouimette C, Kimerling R, et al. The primary care PTSD screen (PC-PTSD): development and operating  
50 characteristics. *Primary Care Psychiatry* 2003; 9(1): 9-14.  
51
- 52  
53 32. Bileuse PD, Wright KM, Adler AB, et al. Validating the Primary Care Post Traumatic Stress Disorder screen and  
54 the Post traumatic Stress Disorder Checklist with soldiers returning from combat. *Journal of Consulting and*  
55 *Clinical Psychology* 2008; 76(2):272–281.  
56  
57



- 1  
2  
3 33. Hoge CW, Auchterlonie JL, Milliken CS. Mental health problems, use of mental health services, and attrition from  
4 military service after returning from deployment to Iraq or Afghanistan. *Journal of the American Medical*  
5 *Association* 2006; 295:1023-1032.  
6  
7  
8  
9 34. Taylor EM, Yanni EA, Pezzi C, et al. Physical and Mental Health Status of Iraqi Refugees Resettled in the United  
10 States. *J Immigr Minor Health* 2014; 16(6): 1130–1137.  
11  
12 35. Caitlin M. Somali Refugee Interpretations of trauma-related Mental Illness: Similarities and Differences between  
13 the Somali concepts of ‘MurugoJoogto’ and ‘Qulub’ and PTSD, *Undergraduate Research Journal at the*  
14 *University of Northern Colorado* 2013;3:1.  
15  
16  
17  
18 36. Araya M. Post-conflict internally displaced persons in Ethiopia: Mental Distress and Quality of life in relation to  
19 Traumatic Life events, Coping Strategy, Social support, and Living Conditions, *PhD Dissertation*, Printed by Print  
20 & Media, Umea University 2007;Umeå, 2003889.  
21  
22  
23 37. Antonovsky A. The structure and properties of sense of coherence scale. *Social Science & Medicine*1994; 36(6):  
24 725-733.  
25  
26  
27 38. Mahammadzadeh A, Poursharifi H, Alipour, A. Validation of Sense of Coherence (SOC) 13-item scale in Iranian  
28 sample. *Procedia Social and Behavioral Sciences* 2010; 5(2010): 1451–1455.  
29  
30  
31 39. Eriksson M, Lindstro B. Validity of Antonovsky’s sense of coherence scale: a systematic review. *J Epidemiol*  
32 *Community Health* 2005; 59: 460–466.  
33  
34 40. AbiolaT,UdofiaO,Zakari M. Psychometric properties of the 3-Item Oslo Social Support Scale among Clinical  
35 Students of Bayero University, Kano, Nigeria; *Malaysian Journal of Psychiatry* 2013; 22:2.  
36  
37  
38 41. Schreiber JB, Nora A, Stage FK, Barlow EA, King J. Reporting Structural Equation Modeling and Confirmatory  
39 Factor Analysis Results: A Review. *The Journal of Educational Research* 2006; 99(6):323-337.  
40  
41  
42 42. Steel Z, Silove D, Brooks R, et al. Impact of immigration detention and temporary protection on the mental health of  
43 refugees. *British Journal of Psychiatry* 2005; 188(1): 58-64.  
44  
45  
46 43. Lincoln, Chatters, Taylor. Social Support, Traumatic Events, and Depressive Symptoms among African Americans.  
47 *J Marriage Fam.* 2005; 67(3): 754–766.  
48  
49  
50 44. Feseha G. G/mariam A and Gerbaba M. Intimate Partner Physical Violence among Women in Shimelba  
51 Refugee Camp, Northern Ethiopia, *BMC Public Health* 2012; 12(125):1-10.  
52  
53  
54  
55  
56  
57  
58  
59  
60

- 1  
2  
3 45. Wirtz, AL, Glass N, Pham K, Aberra A, Rubenstein LS, Singh S, et al. Development of a screening tool to  
4 identify female survivors of gender-based violence in a humanitarian setting: Qualitative evidence from  
5 research among refugees in Ethiopia. *Conflict and Health* 2013; 7:13,doi: 10.1186/1752-1505-7-13.  
6  
7  
8  
9  
10  
11  
12  
13  
14  
15  
16  
17  
18  
19  
20  
21  
22  
23  
24  
25  
26  
27  
28  
29  
30  
31  
32  
33  
34  
35

### 36 **Caption**

37 Figure-1: Path model depicting direct and indirect (mediated) association between exposure to trauma and  
38 mental health outcomes.  
39  
40  
41  
42

### 43 **Legend to Figure-1**

44 All paths are depicting standardized significant coefficients. Rectangles represent observed variables;  
45 circles represent disturbance (error terms); one sided arrows together with coefficient values are equivalent  
46 to regression beta weights between the two variables connected by these arrows; double headed arrows  
47 represent co-variances between error terms.  
48  
49  
50  
51  
52  
53  
54  
55  
56  
57  
58  
59  
60

Figure-1: Path model depicting direct and indirect (mediated) association between exposure to trauma and mental health outcomes.

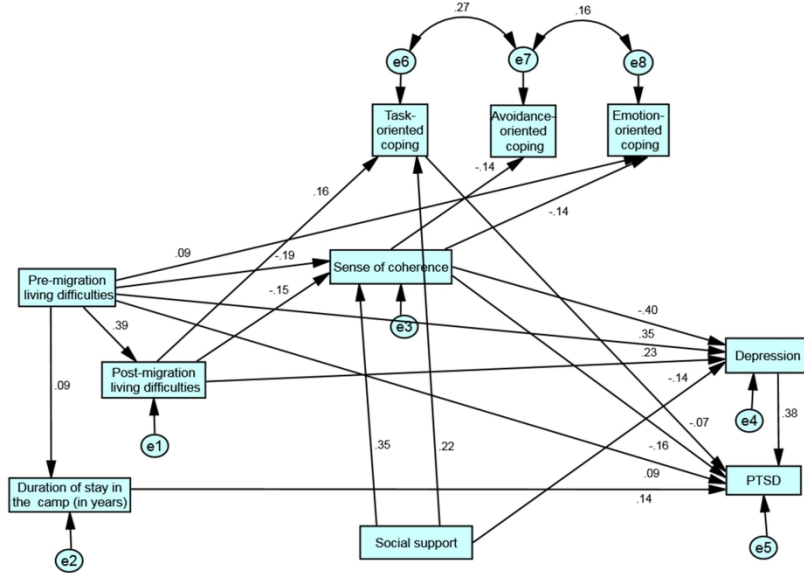

Legend: All paths are depicting standardized significant coefficients. Rectangles represent observed variables, circles represent disturbance (error) terms; one sided arrows together with coefficient values are equivalent to regression beta weights between the two variables; double headed arrows represent co-variances between error terms.

279x238mm (300 x 300 DPI)

## Symptoms of Post Traumatic Stress Disorder and Depression among Eritrean refugees in Ethiopia: Identifying Direct, Meditating and Moderating Predictors from Path Analysis

(FOR REVISED MANUSCRIPT: Manuscript ID bmjopen-2017-021142.R1)

### STROBE 2007 (v4) Statement—Checklist of items that should be included in reports of *cross-sectional studies*

| Section/Topic                | Item # | Recommendation                                                                                                                                                                       | Reported on page # |
|------------------------------|--------|--------------------------------------------------------------------------------------------------------------------------------------------------------------------------------------|--------------------|
| Title and abstract           | 1      | (a) Indicate the study's design with a commonly used term in the title or the abstract                                                                                               | 2                  |
|                              |        | (b) Provide in the abstract an informative and balanced summary of what was done and what was found                                                                                  | 2,3                |
| <b>Introduction</b>          |        |                                                                                                                                                                                      |                    |
| Background/rationale         | 2      | Explain the scientific background and rationale for the investigation being reported                                                                                                 | 3-6                |
| Objectives                   | 3      | State specific objectives, including any pre-specified hypotheses                                                                                                                    | 6                  |
| <b>Methods</b>               |        |                                                                                                                                                                                      |                    |
| Study design                 | 4      | Present key elements of study design early in the paper                                                                                                                              | 7                  |
| Setting                      | 5      | Describe the setting, locations, and relevant dates, including periods of recruitment, exposure, follow-up, and data collection                                                      | 6-8                |
| Participants                 | 6      | (a) Give the eligibility criteria, and the sources and methods of selection of participants                                                                                          | 7                  |
| Variables                    | 7      | Clearly define all outcomes, exposures, predictors, potential confounders, and effect modifiers. Give diagnostic criteria, if applicable                                             | 8                  |
| Data sources/<br>measurement | 8*     | For each variable of interest, give sources of data and details of methods of assessment (measurement). Describe comparability of assessment methods if there is more than one group | 9-14               |
| Bias                         | 9      | Describe any efforts to address potential sources of bias                                                                                                                            | 3,8,14             |
| Study size                   | 10     | Explain how the study size was arrived at                                                                                                                                            | 7                  |
| Quantitative variables       | 11     | Explain how quantitative variables were handled in the analyses. If applicable, describe which groupings were chosen and why                                                         | 14                 |
| Statistical methods          | 12     | (a) Describe all statistical methods, including those used to control for confounding                                                                                                | 14                 |

|                          |     |                                                                                                                                                                                                              |           |
|--------------------------|-----|--------------------------------------------------------------------------------------------------------------------------------------------------------------------------------------------------------------|-----------|
|                          |     | (b) Describe any methods used to examine subgroups and interactions                                                                                                                                          | 14, 21,26 |
|                          |     | (c) Explain how missing data were addressed                                                                                                                                                                  | 7,8       |
|                          |     | (d) If applicable, describe analytical methods taking account of sampling strategy                                                                                                                           | 7,8       |
|                          |     | (e) Describe any sensitivity analyses                                                                                                                                                                        |           |
| <b>Results</b>           |     |                                                                                                                                                                                                              |           |
| Participants             | 13* | (a) Report numbers of individuals at each stage of study—eg numbers potentially eligible, examined for eligibility, confirmed eligible, included in the study, completing follow-up, and analysed            | NA        |
|                          |     | (b) Give reasons for non-participation at each stage                                                                                                                                                         | NA        |
|                          |     | (c) Consider use of a flow diagram                                                                                                                                                                           |           |
| Descriptive data         | 14* | (a) Give characteristics of study participants (eg demographic, clinical, social) and information on exposures and potential confounders                                                                     | 8,14-15   |
|                          |     | (b) Indicate number of participants with missing data for each variable of interest                                                                                                                          | NA        |
| Outcome data             | 15* | Report numbers of outcome events or summary measures                                                                                                                                                         | NA        |
| Main results             | 16  | (a) Give unadjusted estimates and, if applicable, confounder-adjusted estimates and their precision (eg, 95% confidence interval). Make clear which confounders were adjusted for and why they were included | 14,17     |
|                          |     | (b) Report category boundaries when continuous variables were categorized                                                                                                                                    | NA        |
|                          |     | (c) If relevant, consider translating estimates of relative risk into absolute risk for a meaningful time period                                                                                             | NA        |
| Other analyses           | 17  | Report other analyses done—eg analyses of subgroups and interactions, and sensitivity analyses                                                                                                               | 20-22     |
| <b>Discussion</b>        |     |                                                                                                                                                                                                              |           |
| Key results              | 18  | Summarise key results with reference to study objectives                                                                                                                                                     | 22-27     |
| Limitations              | 19  | Discuss limitations of the study, taking into account sources of potential bias or imprecision. Discuss both direction and magnitude of any potential bias                                                   | 3         |
| Interpretation           | 20  | Give a cautious overall interpretation of results considering objectives, limitations, multiplicity of analyses, results from similar studies, and other relevant evidence                                   | 3, 22-27  |
| Generalisability         | 21  | Discuss the generalisability (external validity) of the study results                                                                                                                                        | 26-27     |
| <b>Other information</b> |     |                                                                                                                                                                                                              |           |
| Funding                  | 22  | Give the source of funding and the role of the funders for the present study and, if applicable, for the original study on which the present article is based                                                | 27        |

NA-Not Applicable

\*Give information separately for cases and controls in case-control studies and, if applicable, for exposed and unexposed groups in cohort and cross-sectional studies.

1  
2  
3 **Note:** An Explanation and Elaboration article discusses each checklist item and gives methodological background and published examples of transparent reporting. The STROBE  
4 checklist is best used in conjunction with this article (freely available on the Web sites of PLoS Medicine at <http://www.plosmedicine.org/>, Annals of Internal Medicine at  
5 <http://www.annals.org/>, and Epidemiology at <http://www.epidem.com/>). Information on the STROBE Initiative is available at [www.strobe-statement.org](http://www.strobe-statement.org).  
6  
7  
8  
9  
10  
11  
12  
13  
14  
15  
16  
17  
18  
19  
20  
21  
22  
23  
24  
25  
26  
27  
28  
29  
30  
31  
32  
33  
34  
35  
36  
37  
38  
39  
40  
41  
42  
43  
44  
45  
46

For peer review only
